# Supplementary material for: Metal π-Lewis base activation in palladium(0)-catalyzed trans-alkylative cyclization of alkynals
Source: Royal Society of Chemistry journal article supplement (doi:10.1039/d4sc04190a), 2024-01-01
Supplement: d4sc04190a1.pdf [file d4sc04190a1.pdf]

## Electronic Supplementary Information

### Metal $\pi$ -Lewis Base Activation in Palladium(0)-Catalyzed trans-Alkylative Cyclization of Alkynals

Lei Zhu,<sup>a,b,†</sup> Bo Zhao,<sup>a,†</sup> Ke Xie,<sup>c</sup> Wu-Tao Gui,<sup>c</sup> Sheng-Li Niu,<sup>a</sup> Peng-Fei Zheng,<sup>a</sup> Ying-chun  
Chen,<sup>a,c</sup> Xiao-Wei Qi,<sup>\*b</sup> and Qin Ouyang<sup>\*a</sup>

<sup>a</sup>College of Pharmacy, Third Military Medical University, Shapingba, Chongqing 400038, China Email:  
ouyangq@tmmu.edu.cn.

<sup>b</sup>Breast and Thyroid Surgery, Southwest Hospital, Third Military Medical University, Shapingba, Chongqing  
400038, China Email: qxw9908@foxmail.com.

<sup>c</sup>Key Laboratory of Drug-Targeting and Drug Delivery System of the Ministry of Education and Sichuan Research  
Center for Drug Precision Industrial Technology, West China School of Pharmacy, Sichuan University, Chengdu  
610041, China.

<sup>†</sup> These authors contributed equally.

#### Table of Contents

|                                                                                                                                      |    |
|--------------------------------------------------------------------------------------------------------------------------------------|----|
| 1. Comparison of the metal $\pi$ -Lewis acid activation and $\pi$ -Lewis base activation .....                                       | 2  |
| 2. MeOH acting as an H-bond donor in the $\pi$ -Lewis base activation .....                                                          | 2  |
| 3. Competitive $\beta$ -H elimination and protonation starting from int-3 .....                                                      | 4  |
| 4. Exclusion the possibility of Pd(II)-catalyzed mechanism .....                                                                     | 4  |
| 5. FMO analysis for TS-endo(Y-Shape) and TS-endo(T-Shape) .....                                                                      | 7  |
| 6. Reactivities for $\pi$ -Lewis base activation with PPh <sub>3</sub> (L1) and PCy <sub>3</sub> (L4) .....                          | 8  |
| 7. Regioselectivities for the Pd(PCy <sub>3</sub> ) <sub>2</sub> -catalyzed $\pi$ -Lewis base activation of 1a, 1e, 1f, and 1g ..... | 9  |
| 8. Detected the coordination of 1a and Pd(0) by <sup>13</sup> C NMR .....                                                            | 10 |
| 9. Experimental procedures .....                                                                                                     | 11 |
| 10. Spectrum for compounds .....                                                                                                     | 13 |
| 11. Complete Reference for Gaussian 09 .....                                                                                         | 16 |
| 12. Absolute Calculation Energies, Enthalpies, and Free Energies .....                                                               | 16 |
| 13. Geometries for All the Optimized Compounds and Transition State .....                                                            | 19 |

## 1. Comparison of the metal $\pi$ -Lewis acid activation and $\pi$ -Lewis base activation

In Chatt-Dewar-Duncanson coordination mode, the metal can act as  $\pi$ -Lewis acids by accepting  $\pi$ -electrons of alkynes to enhance their electrophilic reactivity toward diverse nucleophiles. Meanwhile, the empty antibonding molecular orbital of the alkyne ( $\pi^*$ ) is able to accept electrons from the  $d$ -orbitals of metal via  $\pi$ -back-donation. To distinguish the role of Lewis acid or base in the metal-alkyne complex, the electron density of typical Lewis acid metal-alkyne complexes was considered. As shown in Figure S1, in the Au(I)-alkyne complex **int-Au(I)** and Pd(II)-alkyne complex **int-Pd(II)**, there are significant charge transfers from alkyne to metal, indicating the canonical Lewis acid role of Au(I) and Pd(II). However, in the Pd(0)-alkyne complex **int-Pd(0)**, a considerable amount of charge transfer from  $PdL_2$  to alkyne suggests the intrinsic Lewis base role of Pd(0), which is consistent with the Lewis base mode in the  $(Ph_3)_2P_2Pd(0)$ -alkynal complex.

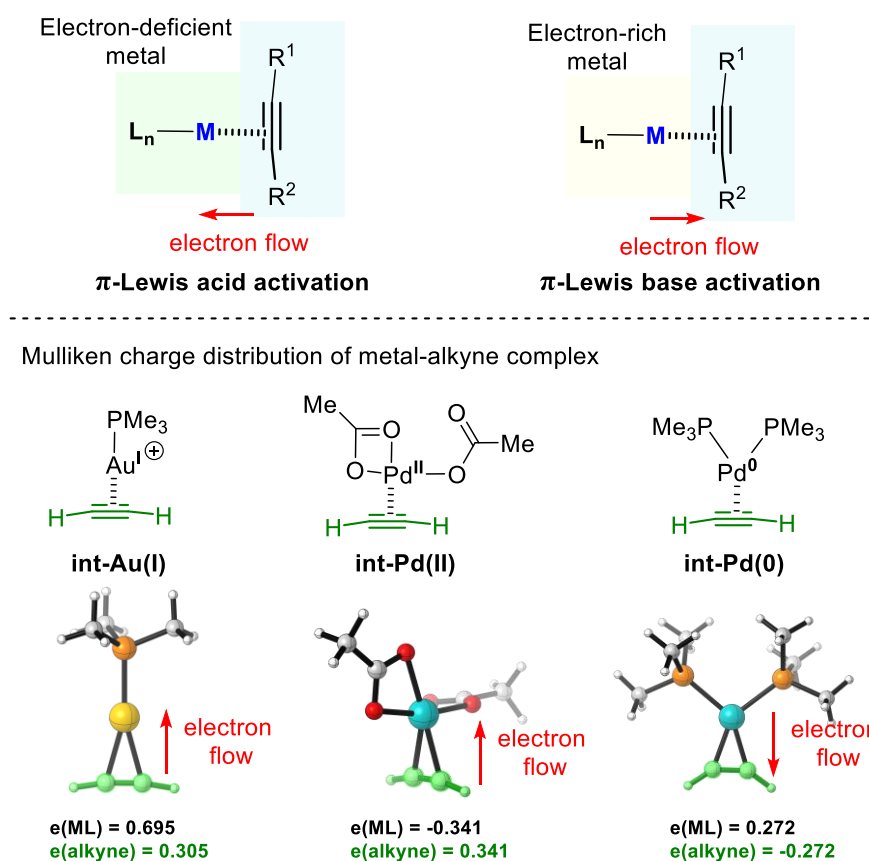

Figure S1. Comparison of the metal  $\pi$ -Lewis acid activation and  $\pi$ -Lewis base activation.

## 2. MeOH acting as an H-bond donor in the $\pi$ -Lewis base activation

As depicted in Figure S2, we also considered the MeOH acting as an H-bond donor in the  $\pi$ -

Lewis base activation. The relative free energy of **TS-endo-MeOH** is 4.9 kcal/mol higher than that of **TS-endo**, which indicates that MeOH didn't play a crucial role in the  $\pi$ -Lewis base activation. While MeOH was considered as a proton source, and the generated counter ion  $\text{MeO}^-$  could be considered as an activator of phenylboronic acid to realize the subsequent Suzuki reaction (see Figure 3 in the text). Moreover, we also have considered the stabilizing effects of arylboronic acid in the  $\pi$ -Lewis base activation. The activation free energy of this process (via **TS-endo-PhB(OH)<sub>2</sub>**) is 11.7 kcal/mol higher than that of **TS-endo**, which indicates the weak Lewis acid ability of arylboronic acid.

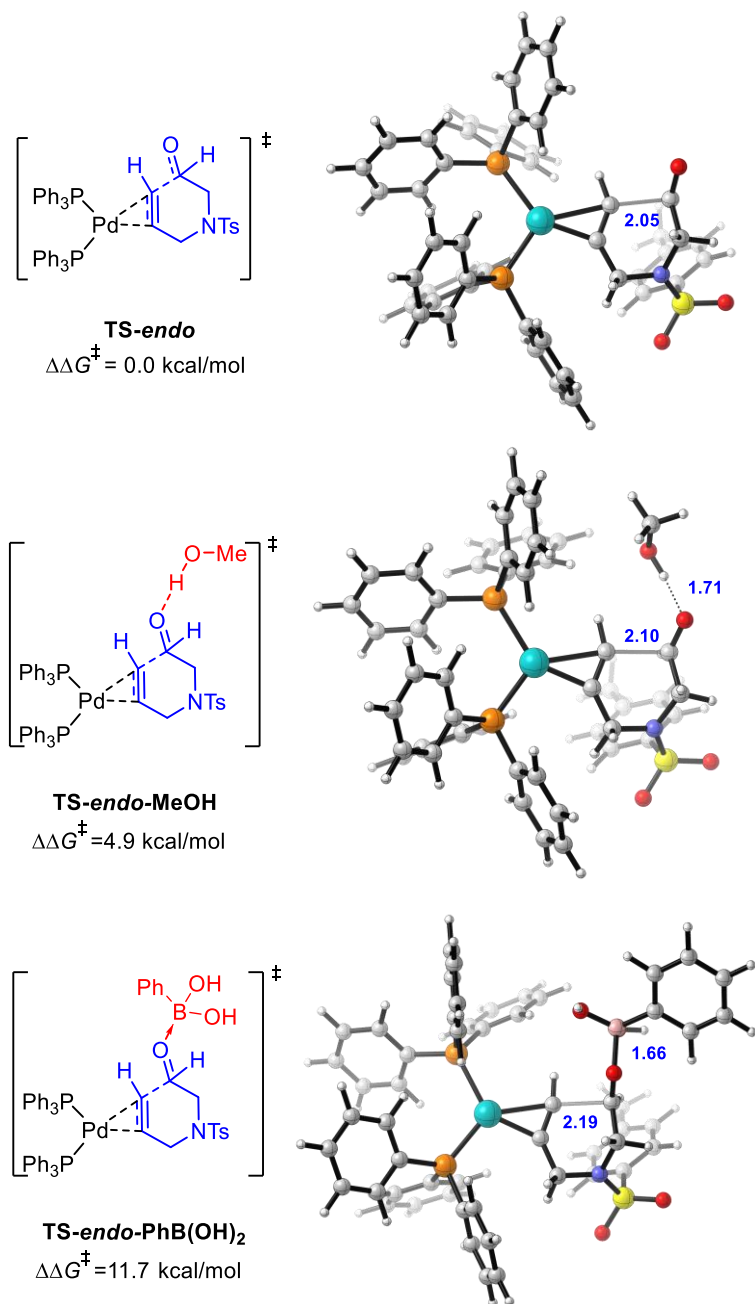

Figure S2. Consideration for the MeOH and arylboronic acid to stabilize the alkoxide in the  $\pi$ -Lewis base activation..

### 3. Competitive $\beta$ -H elimination and protonation starting from **int-3**

The competitive  $\beta$ -H elimination and protonation starting from **int-3** were also taken into consideration. As shown in Figure S3, the free energy barrier of the  $\beta$ -H elimination (via **TS- $\beta$ -H**) is 13.6 kcal/mol higher than that of the transmetalation (via **TS-TM**). Meanwhile, the free energy barrier of the protonation (via **TS-proton**) is extremely high about 50.0 kcal/mol. These results suggest that the transmetalation would preferentially proceed starting from **int-3**, which corroborates that no corresponding hydroalkylative byproduct was detected in the reaction system.

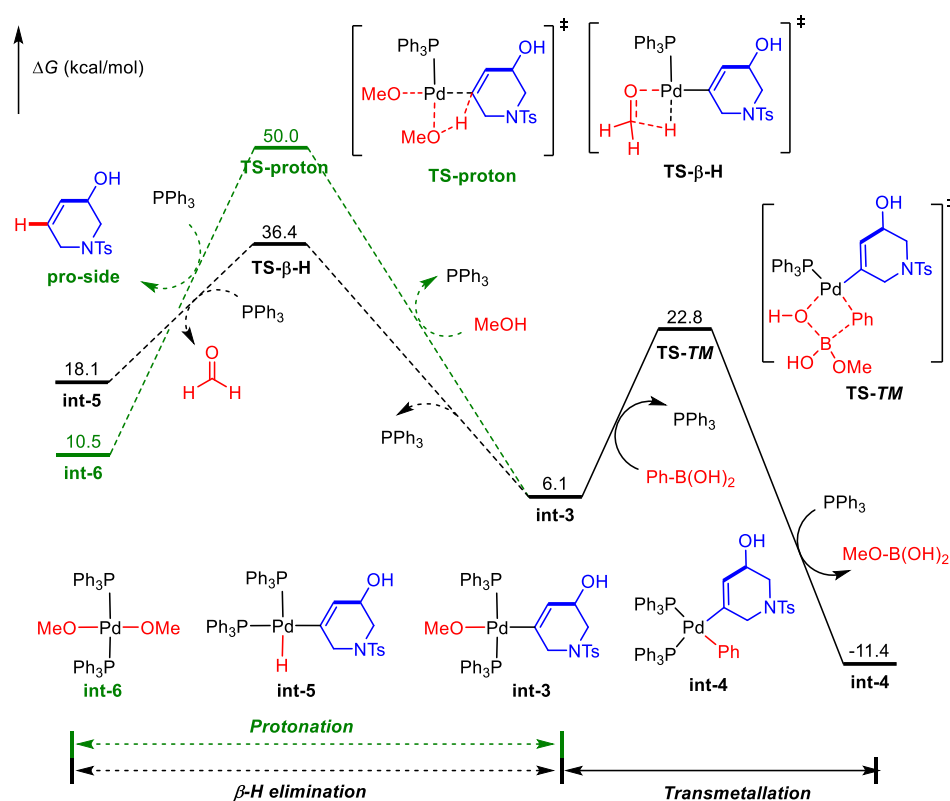

Figure S3. Free energy profile for the competitive  $\beta$ -H elimination and protonation starting from **int-3**.

### 4. Exclusion the possibility of Pd(II)-catalyzed mechanism

To distinguish the rationality of Pd(0)-catalyzed or Pd(II)-catalyzed mechanism in this Pd(0)-catalyzed trans-alkylative cyclization of alkynals, further calculations and control experiments were conducted in the revision, and corresponding results were summarized in below:

Initially, we conducted the calculation for the probable reaction pathway starting from the Pd(II) catalyst. As shown in Figure S4, the  $\text{Pd}(\text{OMe})_2(\text{PPh}_3)_2$  **int-6** was chosen as the initial catalyst complex. The transmetalation between **int-6** and phenylboronic acid proceeds via **TS-1** with an energy barrier of 17.5 kcal/mol to generate aryl-Pd(II) intermediate **int-7** irreversibly. Starting from **int-7**, the

migration insertion (via **TS-2**) of **1a** affords the *cis*-vinyl-Pd(II) intermediate **int-8**, in which following *Z/E*-isomerization (via **TS-3**) generates *trans*-vinyl-Pd(II) intermediate **int-10** reversibly. Then the intramolecular aldehyde 1,2-addition proceeds via **TS-4** to form alkoxy-Pd(II) intermediate **int-11**, from which the subsequent protonation could release the final product. Overall the rate-determining step of the Pd(II)-mediated reaction pathway (black line in Fig S4) is the *Z/E*-isomerization with an energy barrier of 28.6 kcal/mol (referring to **int-8** → **TS-3**), which is close to the activation energy of the Pd(0)-mediated reaction pathway in Fig 3 (28.0 kcal/mol, via **TS-endo**).

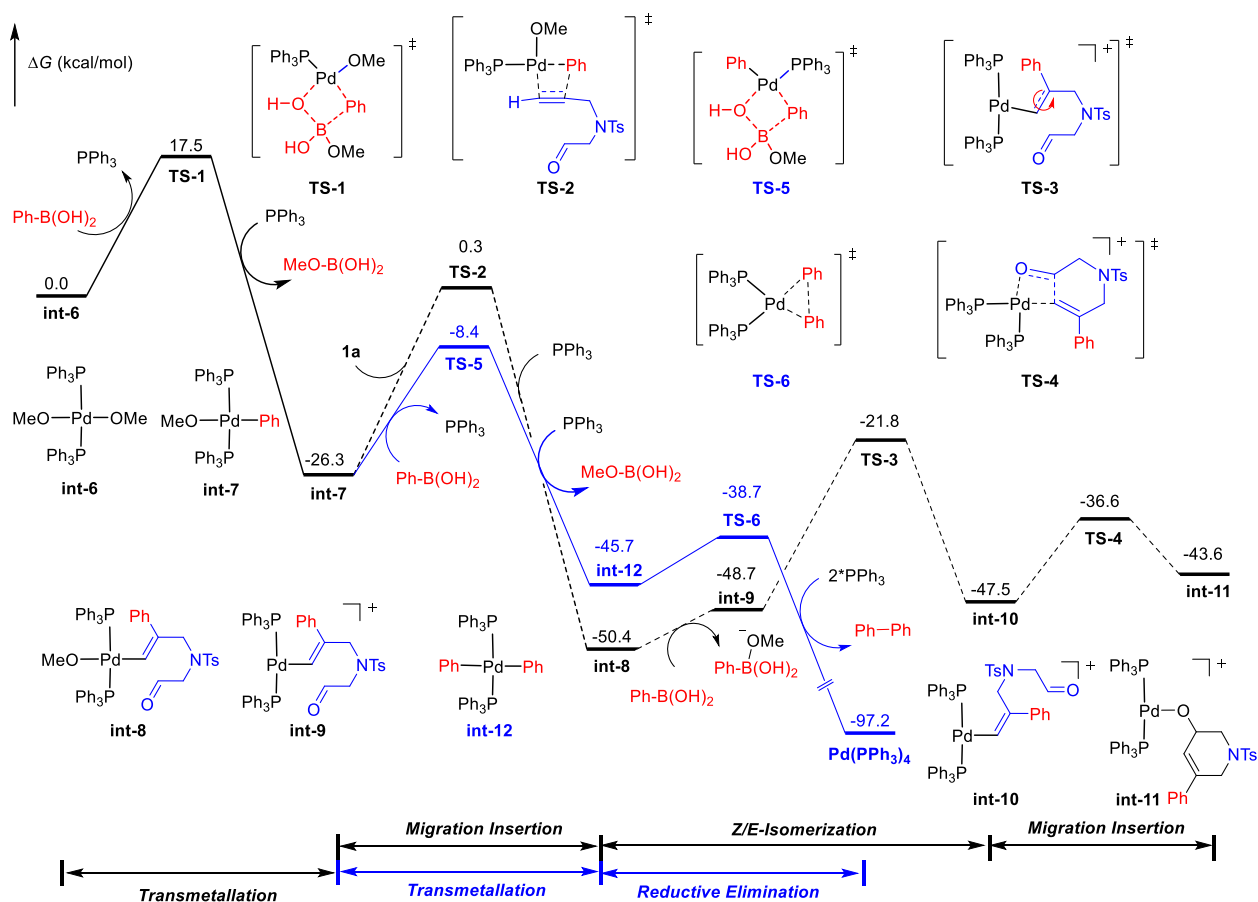

Figure S4. Free energy profile for the probable reaction pathway starting from Pd(II) catalyst.

Meanwhile, starting from **int-7**, an alternative pathway undergoing the second transmetalation via **TS-5** (blue line in Figure S4) generates the diaryl-Pd(II) intermediate **int-7**, in which the following reductive elimination could proceed rapidly to afford Pd(0) species Pd(PPh<sub>3</sub>)<sub>4</sub>. The energy barrier of the second transmetalation is only 17.9 kcal/mol, which is 8.7 kcal/mol lower than that of the corresponding migration insertion (via **TS-2**). It suggests that even if a Pd(II) catalyst is generated, the reduction of Pd(II) with the assistance of phenylboronic acid would preferentially occur rather than a Pd(II)-mediated reaction pathway to generate the final product in this catalytic system. Therefore, the  $\pi$ -Lewis base activation mode starting from the Pd(0) catalyst is proven to be more

theoretically favorable in this reaction.

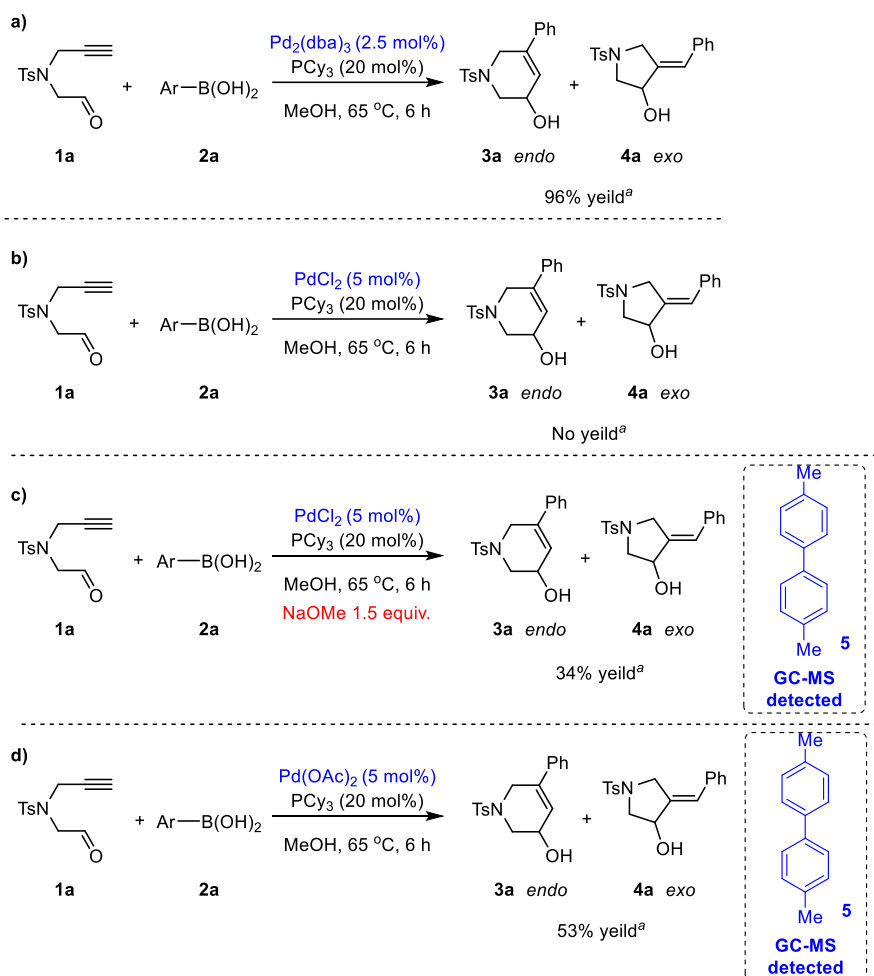

Figure S5. Comparison of Pd(0) and Pd(II) catalysts for the *trans*-alkylative cyclization of alkyne **1a**.

<sup>a</sup>The yield was determined by <sup>1</sup>H NMR analysis. The Ar of Ar-B(OH)<sub>2</sub> represents p-methyl phenyl.

Furthermore, to validate our theoretical results, the control experiments were then conducted. As shown in Figure S5a, the *trans*-alkylative cyclization of alkyne **1a** and **2a** proceeds smoothly mediated by Pd(0) catalyst (Pd<sub>2</sub>(dba)<sub>3</sub>) and PCy<sub>3</sub>, which obtained a 96% yield (mixture of **3a** and **4a**) after 6 hours. While using PdCl<sub>2</sub> as the catalyst (Figure S5b), the corresponding reaction didn't work. It indicates that the Pd(II)-catalyzed mechanism may be not relevant. When adding NaOMe as an additive (Figure S5c), the reaction obtained a 34% yield. Meanwhile, the 4,4'-dimethylbiphenyl **5** was detected by GC-MS as a by-product, which suggests that adding NaOMe promotes two-step transmetalation guiding the generation of **5** and Pd(0) catalyst in situ, thus the reaction can proceed via a Pd(0)-catalyzed pathway. The Pd(OAc)<sub>2</sub> with enhanced transmetalation reactivity could also catalyze this reaction, in which the by-product **5** was also detected (Figure S5d). It is consistent with the aforementioned calculated results in Figure S3, that the reduction of Pd(II) with the assistance of phenylboronic acid might preferentially occur in this Pd(II) system.

Further kinetic studies for the comparison of Pd(0) and Pd(II) catalysts show a low reaction rate as well as an obvious induction period in the Pd(II)-catalyzed system (Figure S6). This result validates our mechanistic speculation of the reduction of Pd(II) with the assistance of phenylboronic acid to generate the active Pd(0) catalyst *in situ*. Therefore, these theoretical and experimental results suggest that the Pd(0)-catalyzed mechanism is more favorable in this Pd-catalyzed *trans*-alkylative cyclization of alkynal.

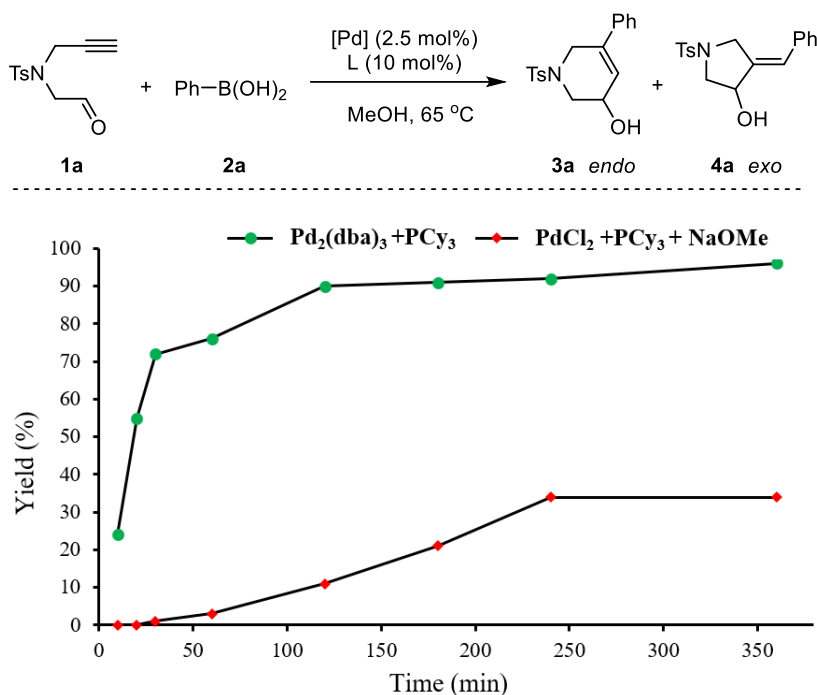

Figure S6. Kinetic studies for the comparison of Pd(0) and Pd(II) catalysts. The yield indicates the total yield of **3a** and **4a**.

## 5. FMO analysis for TS-endo(Y-Shape) and TS-endo(T-Shape)

To get more insights into the different conformation of transition states in  $\pi$ -Lewis base activation, frontier molecular orbital (FMO) analysis was then conducted. As shown in Figure S7, there is a significant orbital overlap between Pd and reactant in **TS-endo(Y-Shape)**. It accordingly reduces owing to the reacting alkyne being perpendicular to the P-Pd-P plane in **TS-endo(T-Shape)**. Thus it results in the high activation free energy of **TS-endo(T-Shape)**.

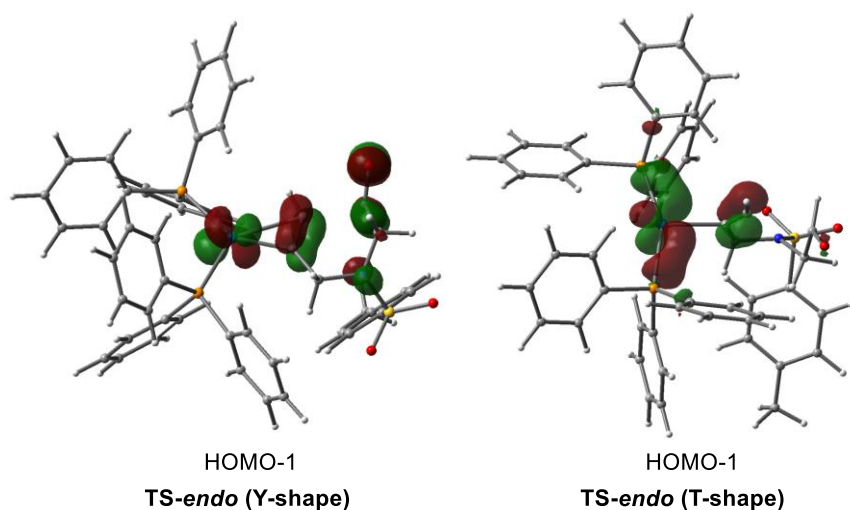

Figure S7. Frontier molecular orbital diagram for **TS-endo(Y-Shape)** and **TS-endo(T-Shape)**.

## 6. Reactivities for $\pi$ -Lewis base activation with $\text{PPh}_3$ (**L1**) and $\text{PCy}_3$ (**L4**)

The energy barriers for  $\pi$ -Lewis base activation with  $\text{PPh}_3$  (**L1**) and  $\text{PCy}_3$  (**L4**) were calculated to evaluate the electron effect of the ligand. As shown in Figure S8, The relative free energy of Pd(0)-alkyne complex **int-1** and **int-1-L4** were set to zero for an intuitionistic comparison. Calculated results showed that the free energy barrier of the **L4**-involved case is 8.7 kcal/mol lower than that of **L1**, correlating with the electron-donating effects. It indicates ligands with greater electron-donating abilities would accelerate this Pd(0)-catalyzed  $\pi$ -Lewis base activation reaction (see Figure 6 and Figure 7 in the text).

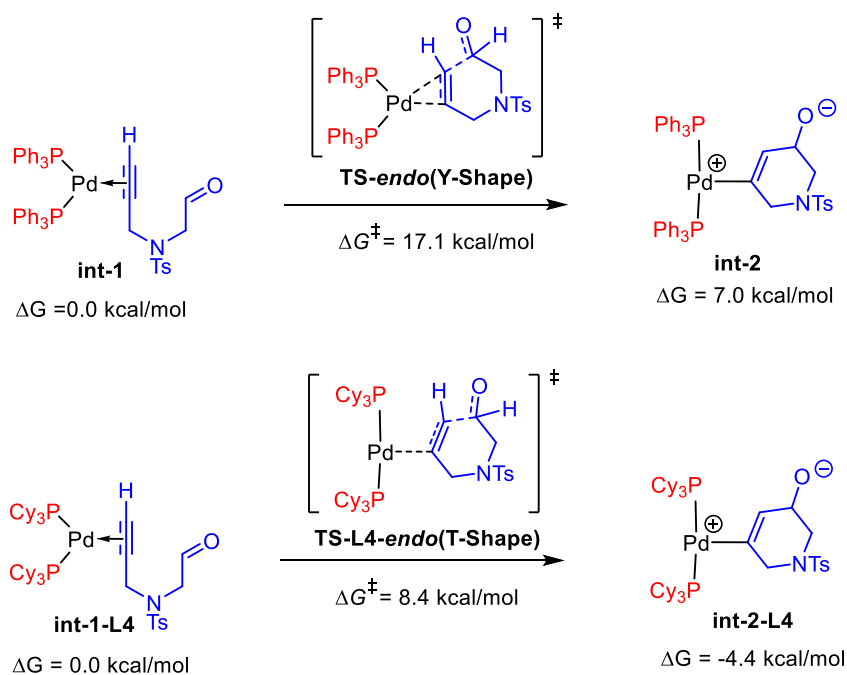

Figure S8. Comparison of the reactivities for  $\pi$ -Lewis base activation with  $\text{PPh}_3$  (**L1**) and  $\text{PCy}_3$  (**L4**).



## 7. Regioselectivities for the Pd(PCy<sub>3</sub>)<sub>2</sub>-catalyzed $\pi$ -Lewis base activation of **1a**, **1e**, **1f**, and **1g**

Previous experimental results showed that *endo*-regioselectivity could be regulated by both steric and electronic effects of the substituent group in the PCy<sub>3</sub> (**L4**) involved case. As shown in Figure S9, the relative free energy of **TS-L4-*exo*** is 0.8 kcal/mol lower than that of **TS-L4-*endo*** due to the weak electron-donating effects of alkyl moiety at **1a**, which is consistent with the observation of the mixture (*endo/exo* = 32 : 68) in the experiment. Meanwhile, large substituents at the terminal position of NTs-tether reactants **1e** and **1f** lead to *endo*-selectivity in the presence of **L4**. Furthermore, the electron-withdrawing as well as steric aryl substituent **1g** performs more *endo*-selective. These results indicate that the regioselectivity depends on both steric and electronic effects in the PCy<sub>3</sub> (**L4**) involved case.

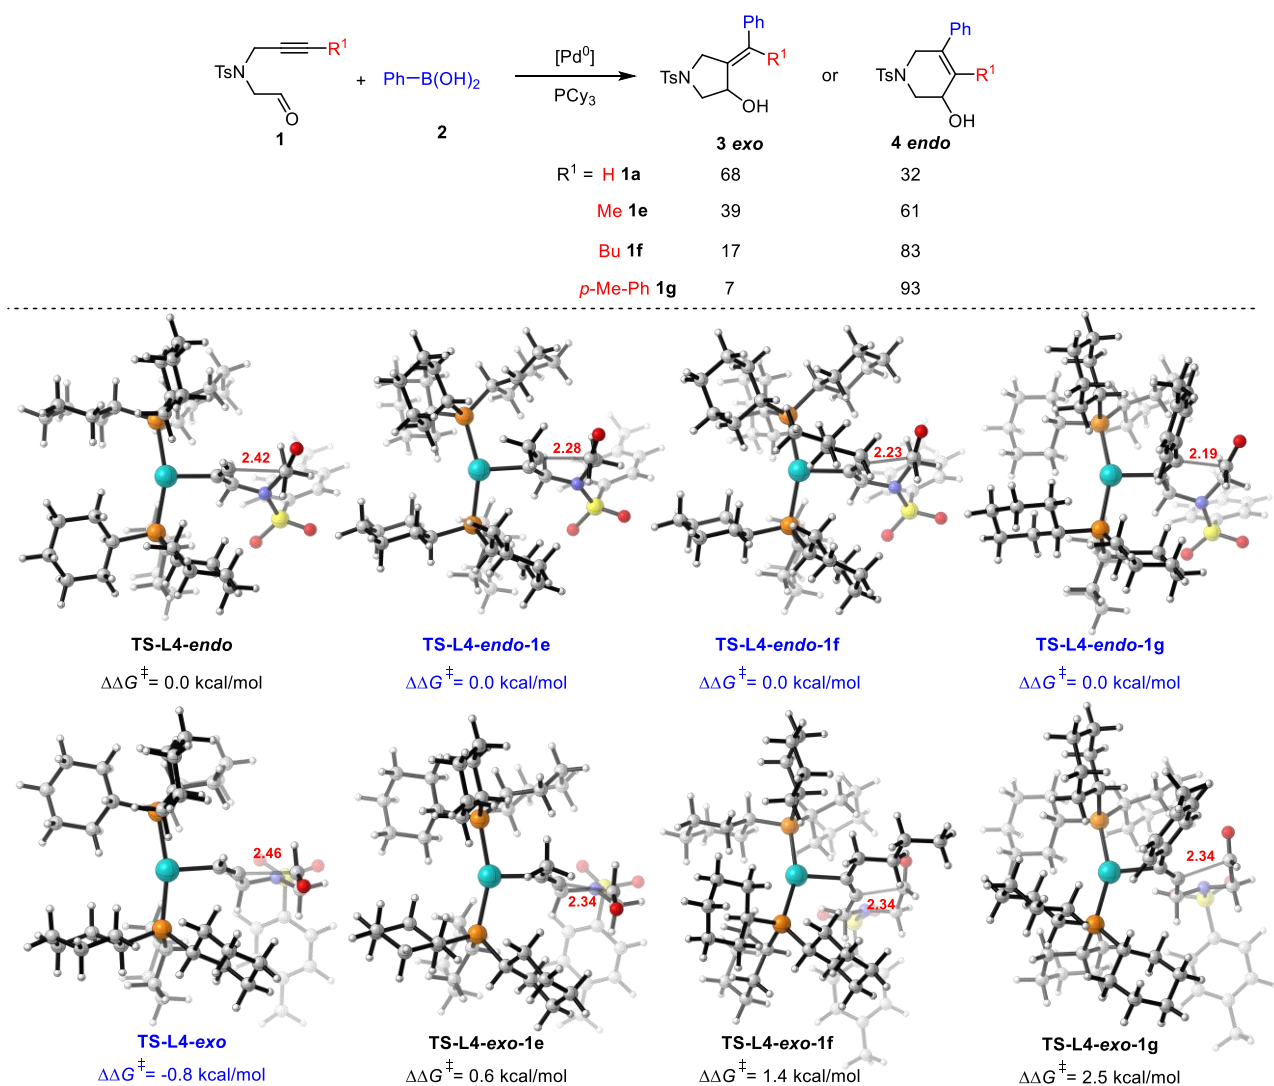

Figure S9. Regioselectivities for the Pd(PCy<sub>3</sub>)<sub>2</sub>-catalyzed  $\pi$ -Lewis base activation of **1a**, **1e**, **1f**, and **1g**.

## 8. Detected the coordination of **1a** and Pd(0) by $^{13}\text{C}$ NMR

To validate the coordination of **1a** and Pd(0) by  $^{13}\text{C}$  NMR, we have carried out NMR studies on the *in situ* generated complexes between alkyne of **1a** and Pd(0). As shown below, when we mix and heat **1a** and Pd(PPh<sub>3</sub>)<sub>4</sub>, the  $^{13}\text{C}$  NMR signals of the triple bond of **1a** are still clear without apparent field shift. However, when we add Pd<sub>2</sub>(dba)<sub>3</sub>/PPh<sub>3</sub> and reduce the ratio of ligand and metal (P/Pd = 3/1), the  $^{13}\text{C}$  NMR signals of the triple bond of **1a** disappeared around 70-80 ppm. These results show that the coordination of **1a** and Pd(0) is only present in the system with a low P/Pd ratio, indicating a weak coordination capacity of alkyne compared with PPh<sub>3</sub>. It corroborates the endotherm of ligand exchange between **1a** and PPh<sub>3</sub> in the theoretical calculation.

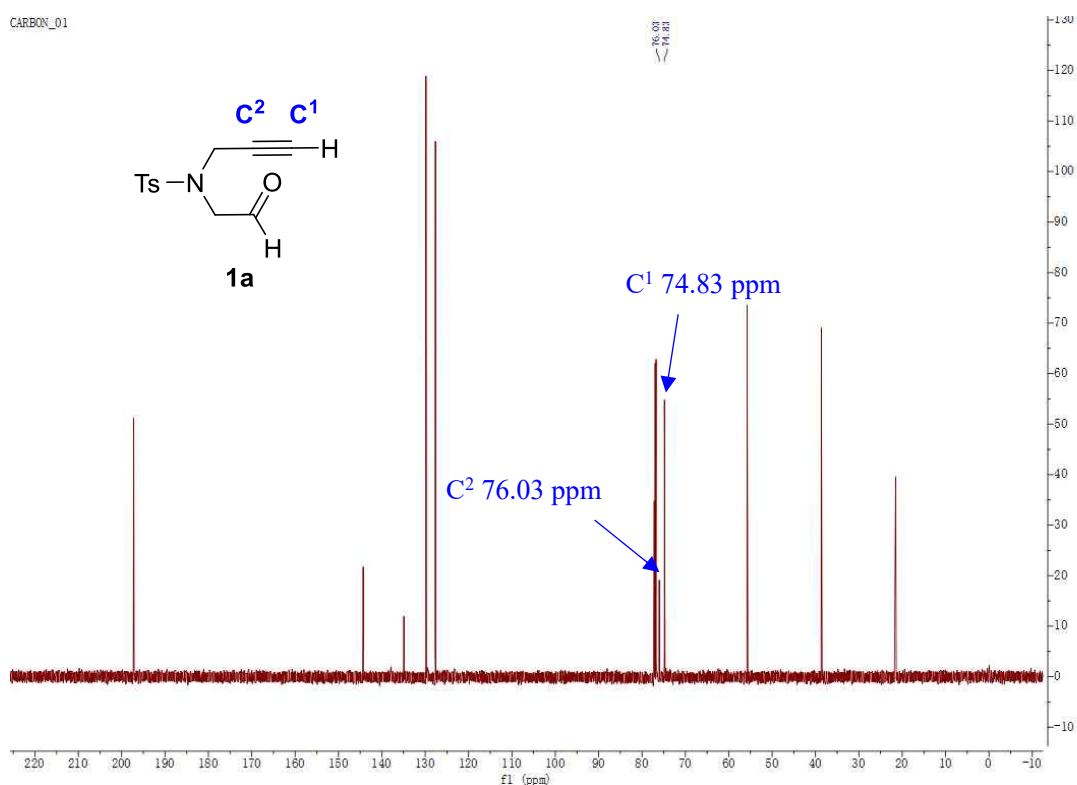

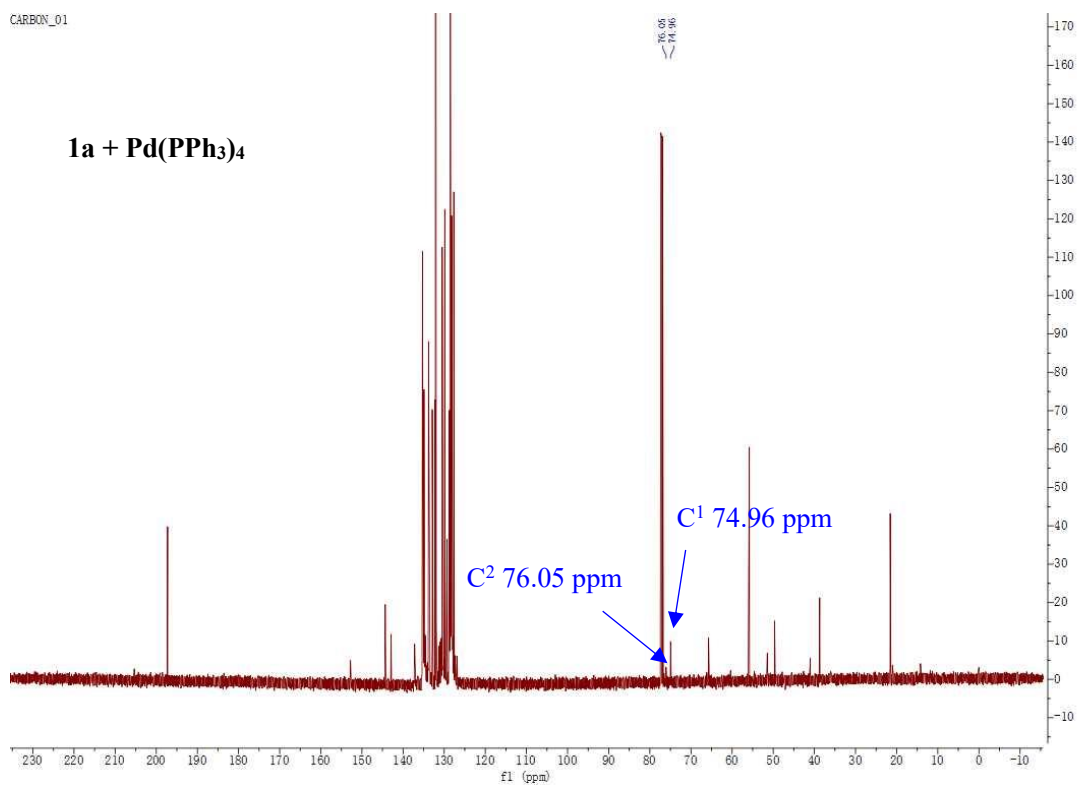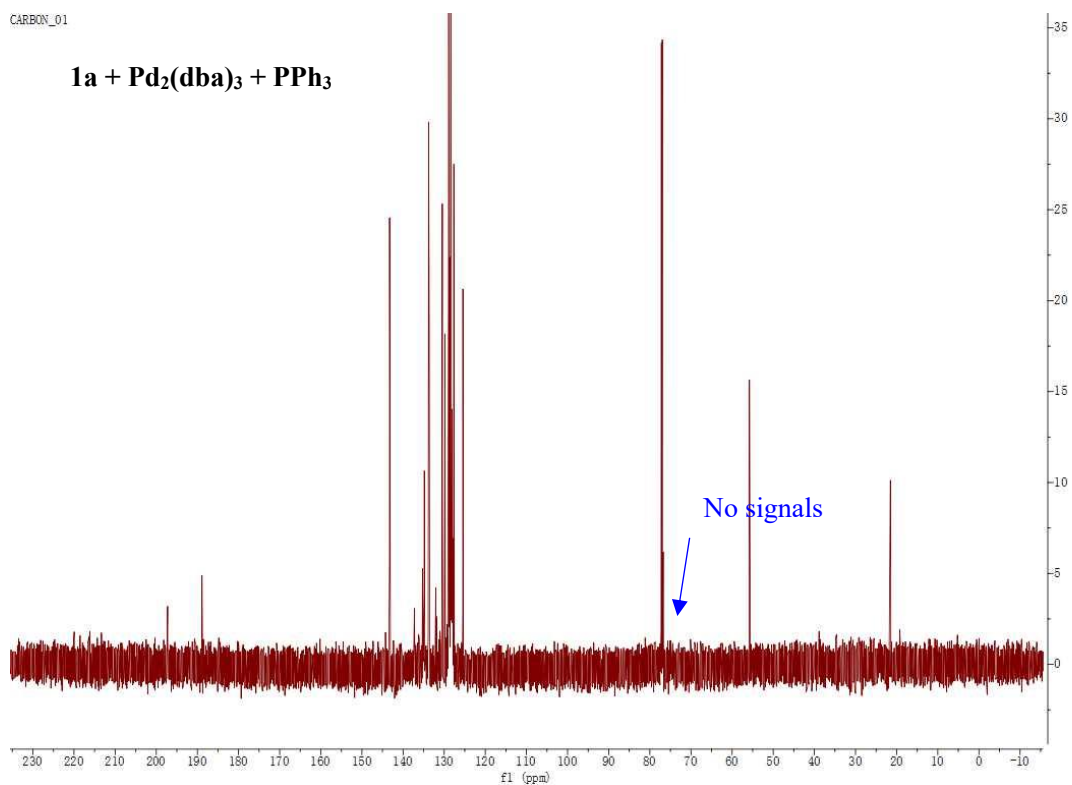

## 9. Experimental procedures

### 9.1 General Procedure

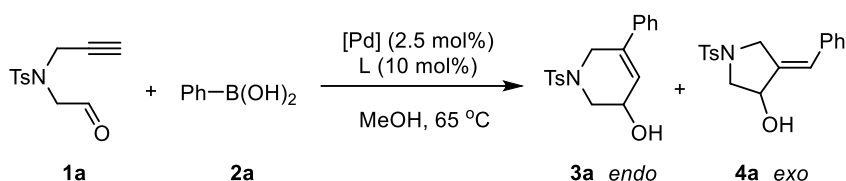

In an  $\text{N}_2$ -filled glovebox, an oven-dried Schlenk tube equipped with a stirrer bar was charged with **1a** (0.2 mmol), *p*-tolylboronic acid **2a** (0.3 mmol, 1.5 equiv),  $\text{PCy}_3$  (30 mol%),  $\text{Pd}_2(\text{dba})_3$  (5 mol%), and MeOH (2 mL). Under a nitrogen atmosphere, The Schlenk tube was sealed with a Teflon screwcap, and the reaction mixture was stirred at  $65^\circ\text{C}$  for 24 h. Upon cooling to room temperature, the reaction mixture was diluted with 10 mL of ethyl acetate, and filtered through a pad of silica gel, followed by washing the pad of the silica gel with ethyl acetate (20 mL). Subsequently, the filtrate was concentrated under reduced pressure. The residue was purified by flash chromatography on silica gel to afford the desired products.

## 9.2 Preparation of reactants

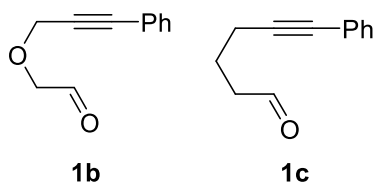

The **1b** and **1c** were prepared according to literature procedures, The structure of the product was identified by comparison with the NMR spectra of the previous report.

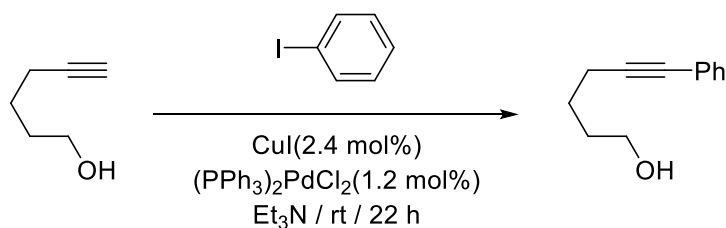

Under nitrogen atmosphere, Iodobenzene (5.4 ml, 48 mmol) was added to a mixture of CuI (183 mg, 0.96 mmol),  $(\text{PPh}_3)_2\text{PdCl}_2$  (337 mg, 0.48 mmol), and  $\text{Et}_3\text{N}$  (80 ml). The solution was stirred at  $25^\circ\text{C}$  for 30 min. Hex-5-yn-1-ol (3.7 ml, 40 mmol) is then added and the mixture is stirred for an additional 22 h at  $25^\circ\text{C}$ . The resulting solution is diluted with EtOAc, filtered over celite and concentrated under reduced pressure. The residue is purified by flash chromatography on silica gel (10% EtOAc/hexane) to afford 6-Phenylhex-5-yn-1-ol (5.1g, 73%) as a yellow oil (*J. Am. Chem. Soc.* **2003**, *125*, 8076-8077).

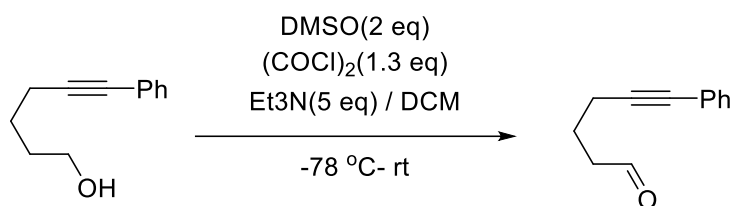

To a solution of oxalyl chloride (3.5 mL, 40 mmol) in anhydrous CH<sub>2</sub>Cl<sub>2</sub> (100 mL) was added DMSO (4.5 mL, 62 mmol) at -78 °C. The mixture was stirred at -78 °C for 10 min, and then a solution of 6-Phenylhex-5-yn-1-ol (5.0 g, 30mmol) in anhydrous CH<sub>2</sub>Cl<sub>2</sub> (10 mL) was added. The mixture was stirred at -78 °C for 2 h, and then triethylamine (22mL, 160 mmol) was added. The reaction was allowed to warm up to 25 °C over 2 h and then partitioned between EtOAc and saturated aqueous NH<sub>4</sub>Cl. The aqueous layer was extracted with EtOAc twice. The combined organic layers were washed with brine, dried over MgSO<sub>4</sub>, and concentrated in vacuo. The residue is purified by flash chromatography on silica gel (20% EtOAc/hexane) to afford 6-phenylhex-5-ynal (1.1g, 21%) as a yellow oil (*Chem. Eur. J.* **2004**, *10*, 5681–5688).

## 10. Spectrum for compounds

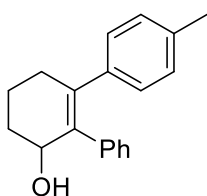

**4-methyl-3',4',5',6'-tetrahydro-[1,1':2',1''-terphenyl]-3'-ol (3b):** Colorless oil; <sup>1</sup>H NMR (600 MHz, CDCl<sub>3</sub>): δ 7.15 (t, J = 7.4 Hz, 2H), 7.012-7.06 (m, 3H), 6.93 – 6.86 (m, 4H), 4.67 (br-s, 1H), 2.63 (dt, J = 18.3, 4.6 Hz, 1H), 2.31-2.25 (m, 1H), 2.23 (s, 3H), 2.06-2.01 (m, 1H), 1.99 – 1.94 (m, 2H), 1.85-1.79 (m, 1H). <sup>13</sup>C NMR (150 MHz, CDCl<sub>3</sub>): δ 140.66, 139.66, 138.91, 136.43, 135.78, 129.76, 128.68, 128.38, 127.97, 126.30, 68.54, 32.33, 31.22, 21.00, 18.39. HRMS(ESI): Calcd for C<sub>19</sub>H<sub>20</sub>O [M + Na]<sup>+</sup> 287.1406, found 287.1406.

<sup>1</sup>H NMR Spectrum of **3b**

PROTON\_01

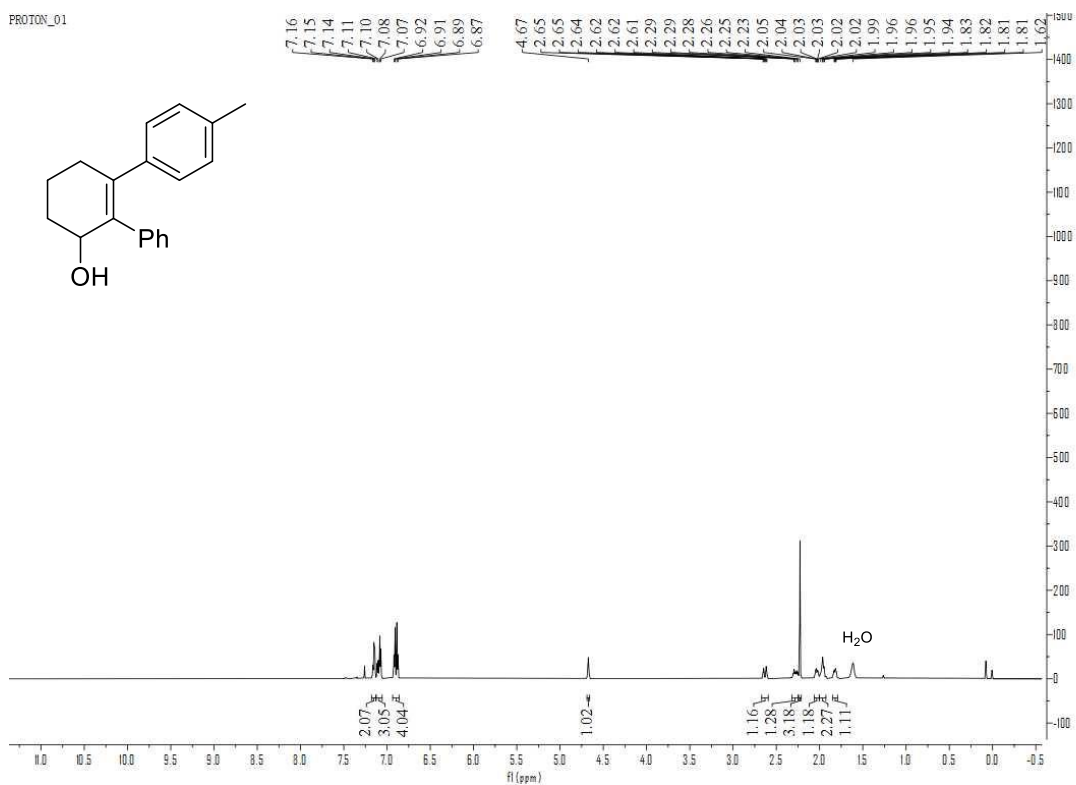

<sup>13</sup>C NMR Spectrum of 3b

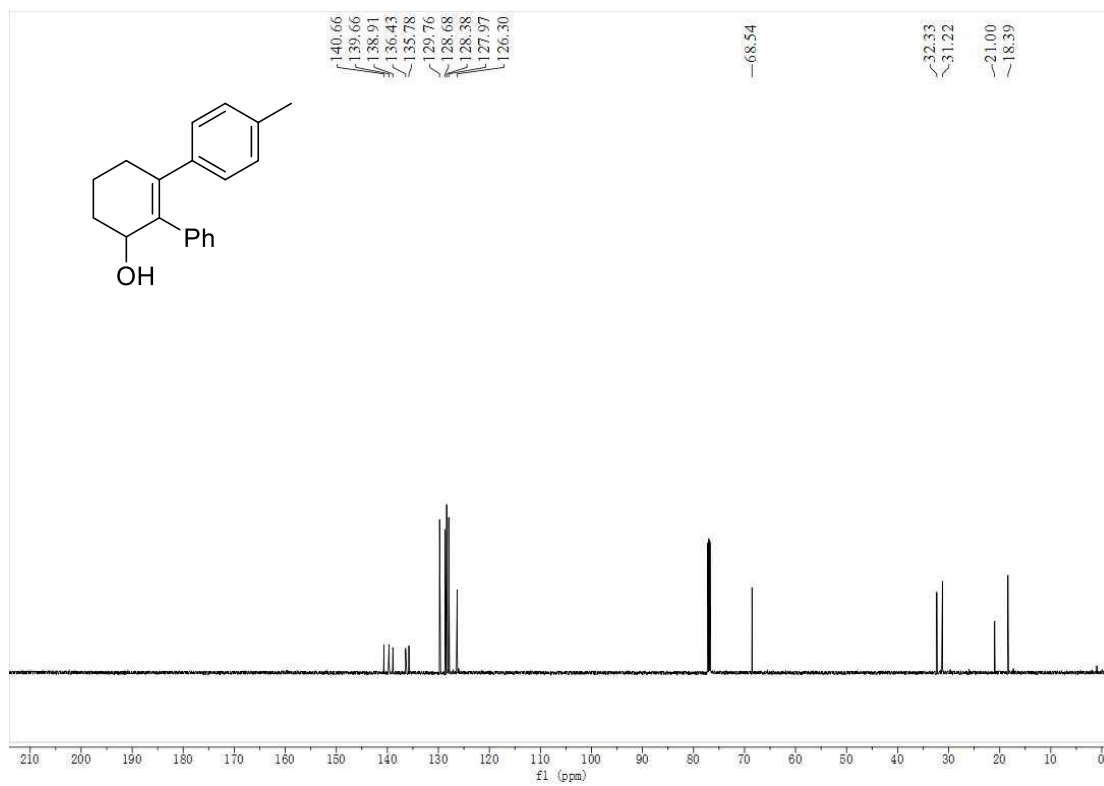

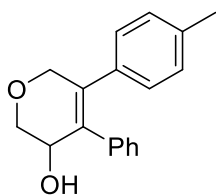

**4-phenyl-5-(p-tolyl)-3,6-dihydro-2H-pyran-3-ol (3c):** Colorless oil;  $^1\text{H NMR}$  (600 MHz,  $\text{CDCl}_3$ ):  $\delta$  7.20-7.10 (m, 5H), 6.98 (d,  $J = 7.8$  Hz, 2H), 6.93 (d,  $J = 7.9$  Hz, 2H), 4.62-4.56 (m, 1H), 4.41 (s, 1H), 4.27 – 4.19 (m, 2H), 3.92-3.86 (m, 1H), 2.42 (br-s, 1H), 2.27 (s, 3H).  $^{13}\text{C NMR}$  (150 MHz,  $\text{CDCl}_3$ ):  $\delta$  139.00, 137.43, 137.05, 134.51, 133.88, 129.32, 128.88, 128.80, 128.09, 126.83, 71.15, 69.39, 66.25, 21.07. **HRMS(ESI):** Calcd for  $\text{C}_{18}\text{H}_{18}\text{O}_2$   $[\text{M} + \text{Na}]^+$  289.1199, found 289.1197.

$^1\text{H NMR}$  Spectrum of **3c**

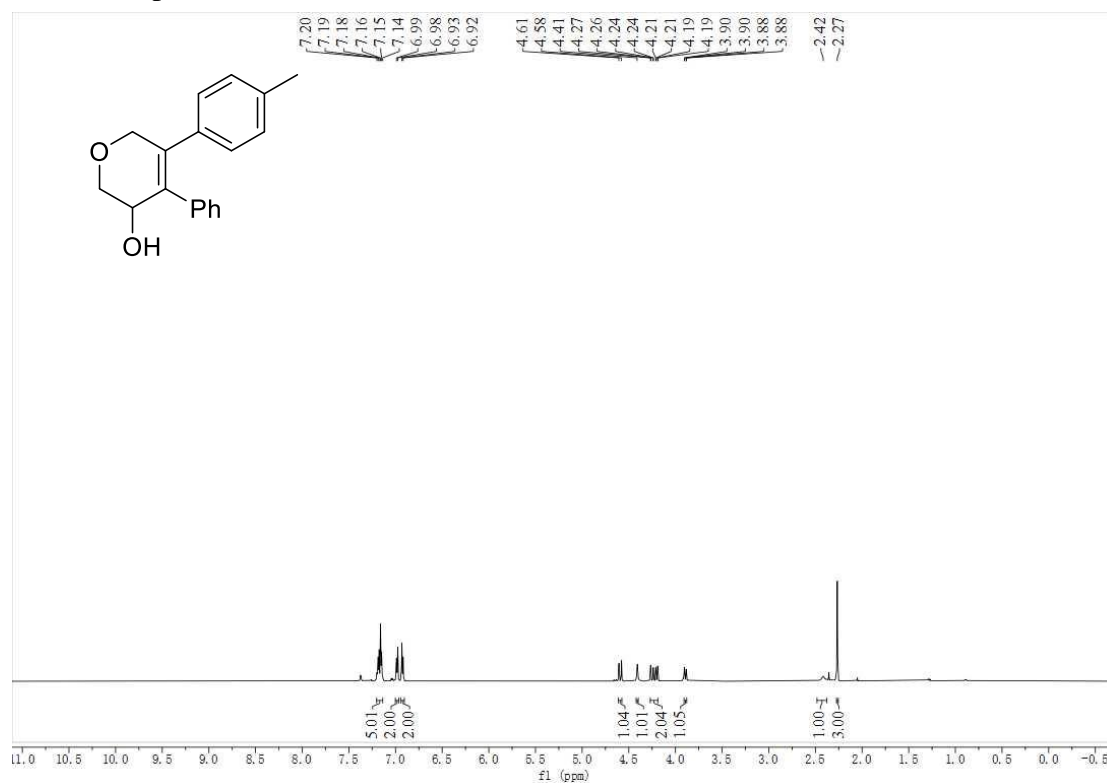

$^{13}\text{C NMR}$  Spectrum of **3c**

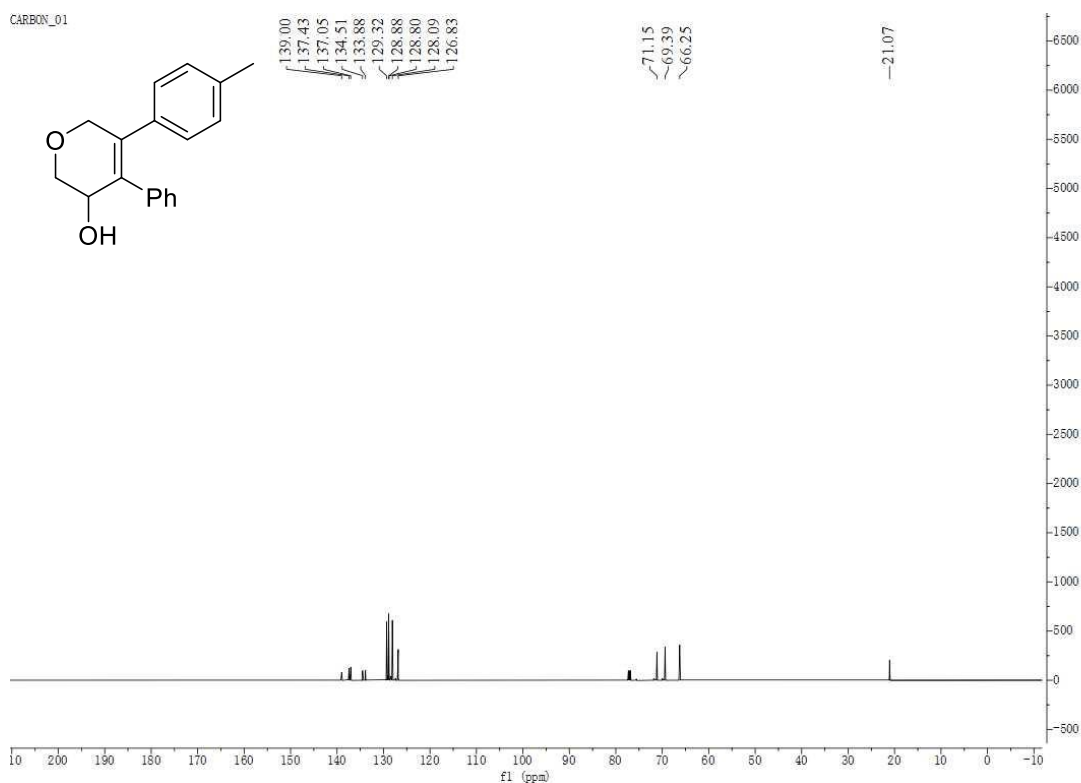

## 11. Complete Reference for Gaussian 09

*Gaussian 09*, Revision D.01, Frisch, M. J.; Trucks, G. W.; Schlegel, H. B.; Scuseria, G. E.; Robb, M. A.; Cheeseman, J. R.; Scalmani, G.; Barone, V.; Mennucci, B.; Petersson, G. A.; Nakatsuji, H.; Caricato, M.; Li, X.; Hratchian, H. P.; Izmaylov, A. F.; Bloino, J.; Zheng, G.; Sonnenberg, J. L.; Hada, M.; Ehara, M.; Toyota, K.; Fukuda, R.; Hasegawa, J.; Ishida, M.; Nakajima, T.; Honda, Y.; Kitao, O.; Nakai, H.; Vreven, T.; Montgomery, Jr., J. A.; Peralta, J. E.; Ogliaro, F.; Bearpark, M.; Heyd, J. J.; Brothers, E.; Kudin, K. N.; Staroverov, V. N.; Kobayashi, R.; Normand, J.; Raghavachari, K.; Rendell, A.; Burant, J. C.; Iyengar, S. S.; Tomasi, J.; Cossi, M.; Rega, N.; Millam, N. J.; Klene, M.; Knox, J. E.; Cross, J. B.; Bakken, V.; Adamo, C.; Jaramillo, J.; Gomperts, R.; Stratmann, R. E.; Yazyev, O.; Austin, A. J.; Cammi, R.; Pomelli, C.; Ochterski, J. W.; Martin, R. L.; Morokuma, K.; Zakrzewski, V. G.; Voth, G. A.; Salvador, P.; Dannenberg, J. J.; Dapprich, S.; Daniels, A. D.; Farkas, Ö.; Foresman, J. B.; Ortiz, J. V.; Cioslowski, J.; Fox, D. J. Gaussian, Inc., Wallingford CT, **2013**.

## 12. Absolute Calculation Energies, Enthalpies, and Free Energies

| Geometry                    | $E_{(\text{elec-B3LYP})}^1$ | $G_{(\text{corr-B3LYP})}^2$ | $H_{(\text{corr-B3LYP})}^3$ | $E_{(\text{solv, M06})}^4$ | IF <sup>5</sup> |
|-----------------------------|-----------------------------|-----------------------------|-----------------------------|----------------------------|-----------------|
| <b>1a</b>                   | -1142.9141                  | 0.180957                    | 0.247223                    | -1143.414418               | -               |
| <b>3a</b>                   | -1375.088152                | 0.284825                    | 0.359497                    | -1375.638188               | -               |
| <b>Ph-B(OH)<sub>2</sub></b> | -407.99627                  | 0.092014                    | 0.133953                    | -408.175033                | -               |



|                                        |              |          |          |              |         |
|----------------------------------------|--------------|----------|----------|--------------|---------|
| <b>PPh<sub>3</sub></b>                 | -1035.72921  | 0.227006 | 0.290261 | -1035.991688 | -       |
| <b>MeOH</b>                            | -115.639087  | 0.028236 | 0.055241 | -115.706896  | -       |
| <b>MeO-B(OH)<sub>2</sub></b>           | -291.586525  | 0.046122 | 0.083147 | -291.777246  | -       |
| <b>Pd(PPh<sub>3</sub>)<sub>4</sub></b> | -4270.906622 | 0.97875  | 1.170719 | -4272.065515 | -       |
| <b>int-1</b>                           | -3342.3854   | 0.677882 | 0.834772 | -3343.455577 | -       |
| <b>int-2</b>                           | -3342.381059 | 0.685322 | 0.836814 | -3343.447631 | -       |
| <b>int-3</b>                           | -3458.066639 | 0.738986 | 0.894719 | -3459.198729 | -       |
| <b>int-4</b>                           | -3574.484924 | 0.782803 | 0.945088 | -3575.622444 | -       |
| <b>int-5</b>                           | -3343.606962 | 0.705455 | 0.857484 | -3344.668357 | -       |
| <b>int-6</b>                           | -2429.520786 | 0.552739 | 0.676046 | -2430.208896 | -       |
| <b>int-7</b>                           | -2545.955571 | 0.597894 | 0.726653 | -2546.64792  | -       |
| <b>int-8</b>                           | -3688.938573 | 0.809254 | 0.978493 | -3690.135625 | -       |
| <b>int-9</b>                           | -3573.758974 | 0.769987 | 0.934392 | -3574.878304 | -       |
| <b>int-10</b>                          | -3573.758224 | 0.771035 | 0.934341 | -3574.877494 | -       |
| <b>int-11</b>                          | -3573.771622 | 0.778047 | 0.937011 | -3574.874187 | -       |
| <b>int-12</b>                          | -2662.380432 | 0.644081 | 0.777392 | -2663.076845 | -       |
| <b>pro-side</b>                        | -1144.19183  | 0.210156 | 0.273639 | -1144.685458 | -       |
| <b>int-Au(I)</b>                       | -673.905873  | 0.104599 | 0.154635 | -674.028555  | -       |
| <b>int-Pd(II)</b>                      | -661.886634  | 0.086476 | 0.145772 | -662.190248  | -       |
| <b>int-Pd(0)</b>                       | -1127.151396 | 0.207797 | 0.276167 | -1127.422363 | -       |
| <b>int-oxcyc</b>                       | -3342.41541  | 0.690176 | 0.836273 | -3343.471945 | -       |
| <b>int-LA</b>                          | -3342.338765 | 0.684006 | 0.833400 | -3343.398324 | -       |
| <b>int-1-L2</b>                        | -3349.632157 | 0.816568 | 0.975380 | -3350.709912 | -       |
| <b>int-1-L3</b>                        | -3356.875789 | 0.954073 | 1.115926 | -3357.960138 | -       |
| <b>int-1-L4</b>                        | -3364.107858 | 1.090786 | 1.256611 | -3365.198869 | -       |
| <b>int-2-L4</b>                        | -3364.121741 | 1.100912 | 1.259315 | -3365.211843 | -       |
| <b>TS-endo</b>                         | -3342.354265 | 0.678735 | 0.83292  | -3343.429094 | 411.08i |
| <b>TS-exo</b>                          | -3342.353066 | 0.679442 | 0.833235 | -3343.423411 | 384.61i |
| <b>TS-endo-side</b>                    | -3342.353611 | 0.680683 | 0.833111 | -3343.424134 | 446.50i |
| <b>TS-endo-MeOH</b>                    | -3458.007592 | 0.726319 | 0.890552 | -3459.143344 | 471.00i |
| <b>TS-endo-PhB(OH)<sub>2</sub></b>     | -3750.356307 | 0.79499  | 0.968591 | -3751.605676 | 537.68i |

|                            |              |          |          |              |                 |
|----------------------------|--------------|----------|----------|--------------|-----------------|
| <b>TS-proton</b>           | -2537.926979 | 0.53005  | 0.653493 | -2538.833817 | <i>1115.25i</i> |
| <b>TS-β-H</b>              | -2422.287381 | 0.478684 | 0.596128 | -2423.129739 | <i>253.99i</i>  |
| <b>TS-1</b>                | -1801.764575 | 0.413924 | 0.517138 | -1802.360604 | <i>320.65i</i>  |
| <b>TS-2</b>                | -2653.110321 | 0.550501 | 0.681661 | -2654.026849 | <i>264.73i</i>  |
| <b>TS-3</b>                | -3573.706853 | 0.766398 | 0.930753 | -3574.831857 | <i>66.76i</i>   |
| <b>TS-4</b>                | -3573.740959 | 0.776537 | 0.934371 | -3574.865701 | <i>315.88i</i>  |
| <b>TS-5</b>                | -1918.198117 | 0.461674 | 0.567945 | -1918.801407 | <i>332.96i</i>  |
| <b>TS-6</b>                | -2662.362477 | 0.642611 | 0.775393 | -2663.064227 | <i>322.15i</i>  |
| <b>TS-oxcyc</b>            | -3342.352029 | 0.681661 | 0.833318 | -3343.417913 | <i>341.52i</i>  |
| <b>TS-LA</b>               | -3342.324444 | 0.678404 | 0.832751 | -3343.387116 | <i>511.41i</i>  |
| <b>TS-TM</b>               | -2830.312661 | 0.601009 | 0.735866 | -2831.352568 | <i>318.85i</i>  |
| <b>TS-RE</b>               | -3574.466167 | 0.782259 | 0.943482 | -3575.607074 | <i>337.60i</i>  |
| <b>TS-endo(T-shape)</b>    | -3342.351905 | 0.677137 | 0.832871 | -3343.420804 | <i>241.29i</i>  |
| <b>TS-L2-endo(Y-shape)</b> | -3349.603442 | 0.819029 | 0.973827 | -3350.681596 | <i>465.26i</i>  |
| <b>TS-L2-endo(T-shape)</b> | -3349.601791 | 0.817154 | 0.973595 | -3350.67703  | <i>243.23i</i>  |
| <b>TS-L3-endo(Y-shape)</b> | -3356.846994 | 0.954242 | 1.11422  | -3357.934349 | <i>424.27i</i>  |
| <b>TS-L3-endo(T-shape)</b> | -3356.85098  | 0.95136  | 1.113644 | -3357.932479 | <i>229.24i</i>  |
| <b>TS-L4-endo(Y-shape)</b> | -3364.081614 | 1.093638 | 1.255105 | -3365.173929 | <i>387.13i</i>  |
| <b>TS-L4-endo(T-shape)</b> | -3364.086047 | 1.088337 | 1.254243 | -3365.178951 | <i>151.29i</i>  |
| <b>TS-endo-1d</b>          | -2660.13499  | 0.610189 | 0.74291  | -2660.876059 | <i>350.51i</i>  |
| <b>TS-exo-1d</b>           | -2660.135956 | 0.607099 | 0.742955 | -2660.870399 | <i>356.46i</i>  |
| <b>TS-L4-exo</b>           | -3364.095235 | 1.087379 | 1.254021 | -3365.179243 | <i>74.95i</i>   |
| <b>TS-L4-endo-1d</b>       | -2681.864626 | 1.017822 | 1.16398  | -2682.624236 | <i>213.45i</i>  |
| <b>TS-L4-exo-1d</b>        | -2681.87829  | 1.018774 | 1.164284 | -2682.628802 | <i>222.49i</i>  |
| <b>TS-L4-endo-1e</b>       | -3403.379811 | 1.115763 | 1.284225 | -3404.483817 | <i>240.35i</i>  |
| <b>TS-L4-exo-1e</b>        | -3403.382598 | 1.11711  | 1.284235 | -3404.484219 | <i>180.54i</i>  |
| <b>TS-L4-endo-1f</b>       | -3521.234543 | 1.197803 | 1.373719 | -3522.370871 | <i>246.60i</i>  |
| <b>TS-L4-exo-1f</b>        | -3521.235433 | 1.196462 | 1.373489 | -3522.367295 | <i>143.24i</i>  |
| <b>TS-L4-endo-1g</b>       | -3634.277734 | 1.189808 | 1.370278 | -3635.443638 | <i>221.86i</i>  |
| <b>TS-L4-exo-1g</b>        | -3634.273232 | 1.189842 | 1.369951 | -3635.439654 | <i>136.17i</i>  |

<sup>1</sup>The electronic energy calculated by B3LYP in methanol solvent. <sup>2</sup>The thermal correction to Gibbs free energy

calculated by B3LYP in methanol solvent. <sup>3</sup>The thermal correction to enthalpy calculated by B3LYP in methanol solvent. <sup>4</sup>The electronic energy calculated by M06 in methanol solvent. <sup>5</sup>The B3LYP calculated imaginary frequencies for the transition states.

### 13. Geometries for All the Optimized Compounds and Transition State

|           |             |             |             |                             |             |             |             |
|-----------|-------------|-------------|-------------|-----------------------------|-------------|-------------|-------------|
| <b>1a</b> |             |             |             | H                           | 1.21262800  | 1.94357700  | -0.77651100 |
| C         | 1.69584800  | 1.30906000  | 1.89800900  | C                           | -0.87439900 | 2.42214700  | -0.32661300 |
| C         | 1.21200300  | 2.35748700  | 2.26815200  | O                           | -1.04976400 | 3.57722000  | -1.13868300 |
| H         | 0.77786100  | 3.28730500  | 2.59759500  | H                           | -0.57630300 | 2.72573500  | 0.69632500  |
| C         | 2.30374000  | 0.04678800  | 1.45146200  | S                           | 1.08693200  | -0.08080600 | 1.07065300  |
| H         | 3.40214200  | 0.15252500  | 1.46105200  | O                           | 0.63068000  | -1.35070200 | 1.66278100  |
| H         | 2.06630500  | -0.75814400 | 2.16158700  | O                           | 1.10838500  | 1.12503900  | 1.92339900  |
| N         | 1.91357200  | -0.38597400 | 0.10682600  | C                           | 2.74151400  | -0.31218100 | 0.43531800  |
| C         | 2.43745100  | 0.33985000  | -1.03988300 | C                           | 3.03710000  | -1.48419500 | -0.27456200 |
| H         | 3.53053800  | 0.45131400  | -0.94302300 | C                           | 3.72154100  | 0.65032400  | 0.68177200  |
| H         | 2.26079900  | -0.25422200 | -1.95260500 | C                           | 4.33176500  | -1.67683000 | -0.74726200 |
| C         | 1.82545100  | 1.70645500  | -1.28346800 | H                           | 2.26682700  | -2.23789400 | -0.45226100 |
| O         | 2.43107700  | 2.60520800  | -1.82374800 | C                           | 5.01593300  | 0.43845100  | 0.19696900  |
| H         | 0.75961300  | 1.82689000  | -0.97341700 | H                           | 3.47929000  | 1.55110100  | 1.24788200  |
| S         | 0.73622600  | -1.56391800 | -0.08845800 | C                           | 5.34304200  | -0.72066800 | -0.52272900 |
| O         | 0.95152800  | -2.13978200 | -1.42473800 | H                           | 4.56779800  | -2.58989500 | -1.30110600 |
| O         | 0.81176900  | -2.42381700 | 1.10258500  | H                           | 5.78534000  | 1.19166900  | 0.38629700  |
| C         | -0.87207200 | -0.78210500 | -0.08854700 | H                           | -3.06444000 | 2.35264100  | -0.15840000 |
| C         | -1.44318800 | -0.38296900 | -1.30236200 | H                           | -0.27979500 | 4.15198900  | -1.01137100 |
| C         | -1.53397800 | -0.57051100 | 1.12610200  | C                           | -3.65658400 | -0.30920300 | -0.21000300 |
| C         | -2.68968000 | 0.24320400  | -1.28933000 | C                           | -4.75876300 | 0.31915800  | 0.40856900  |
| H         | -0.92693500 | -0.56722100 | -2.24617100 | C                           | -3.85364000 | -1.60142100 | -0.74047200 |
| C         | -2.77928900 | 0.05816300  | 1.11656700  | C                           | -6.00396100 | -0.30686600 | 0.47524400  |
| H         | -1.08965900 | -0.89915700 | 2.06723500  | H                           | -4.63585800 | 1.30437500  | 0.86344100  |
| C         | -3.37858700 | 0.47515800  | -0.08529100 | C                           | -5.10218800 | -2.22744400 | -0.67404800 |
| H         | -3.13911100 | 0.55407900  | -2.23642600 | H                           | -3.03198900 | -2.12813900 | -1.22944300 |
| H         | -3.29870800 | 0.22420700  | 2.06428200  | C                           | -6.18477700 | -1.58434800 | -0.06823200 |
| C         | -4.73813700 | 1.12139900  | -0.08730900 | H                           | -6.83777300 | 0.20319200  | 0.96571300  |
| H         | -4.84504500 | 1.83435000  | -0.91911700 | H                           | -5.22622700 | -3.22651400 | -1.10107200 |
| H         | -5.52811300 | 0.35864300  | -0.20859000 | H                           | -7.15972700 | -2.07593600 | -0.01222300 |
| H         | -4.93667300 | 1.64918700  | 0.85774300  | C                           | 6.73611800  | -0.95352900 | -1.04343100 |
| <b>3a</b> |             |             |             | H                           | 7.17247600  | -1.86657500 | -0.60382900 |
| C         | -2.33106800 | 0.36068800  | -0.29343100 | H                           | 6.72927600  | -1.09977200 | -2.13668700 |
| C         | -2.19035900 | 1.70079000  | -0.25088000 | H                           | 7.40274300  | -0.10994900 | -0.81274400 |
| C         | -1.11401100 | -0.53398400 | -0.46459600 | <b>Ph-B(OH)<sub>2</sub></b> |             |             |             |
| H         | -1.12377000 | -0.98356700 | -1.47384000 | C                           | -0.17402100 | 0.00017000  | 0.00035300  |
| H         | -1.14703900 | -1.36867200 | 0.24757100  | C                           | 0.55499500  | -1.20603000 | 0.01361200  |
| N         | 0.15888300  | 0.17450900  | -0.30223600 | C                           | 0.55524500  | 1.20615600  | -0.01306500 |
| C         | 0.21162900  | 1.50648500  | -0.90556300 | C                           | 1.95300800  | -1.21067700 | 0.01428800  |
| H         | 0.03569800  | 1.39728600  | -1.98882000 | H                           | 0.01767400  | -2.15873300 | 0.02449600  |

|   |             |             |             |
|---|-------------|-------------|-------------|
| C | 1.95328100  | 1.21058800  | -0.01440300 |
| H | 0.01809400  | 2.15899000  | -0.02358700 |
| C | 2.65559300  | -0.00010400 | -0.00027700 |
| H | 2.49776600  | -2.15912800 | 0.02585600  |
| H | 2.49821000  | 2.15893900  | -0.02631700 |
| H | 3.74946000  | -0.00020900 | -0.00058300 |
| B | -1.74933200 | 0.00003200  | 0.00006700  |
| O | -2.39360200 | -1.20599800 | -0.02870500 |
| H | -3.36149400 | -1.15224800 | -0.02947000 |
| O | -2.39388300 | 1.20589900  | 0.02837200  |
| H | -3.36178300 | 1.15240200  | 0.02888500  |

**PPh<sub>3</sub>**

|   |             |             |             |
|---|-------------|-------------|-------------|
| P | 0.00006200  | 0.00076700  | -1.19199000 |
| C | -1.46340800 | 0.81551400  | -0.39684700 |
| C | -2.71553100 | 0.60599000  | -1.00587900 |
| C | -1.39533300 | 1.64736700  | 0.73366500  |
| C | -3.87142300 | 1.19521300  | -0.48653900 |
| H | -2.78676600 | -0.02499100 | -1.89745500 |
| C | -2.55156900 | 2.24700200  | 1.24636200  |
| H | -0.43611700 | 1.83102600  | 1.22308600  |
| C | -3.79171700 | 2.02062000  | 0.64102300  |
| H | -4.83618200 | 1.01735900  | -0.96991100 |
| H | -2.48074200 | 2.89289600  | 2.12615400  |
| H | -4.69375200 | 2.49000800  | 1.04314600  |
| C | 1.43764900  | 0.85928700  | -0.39534700 |
| C | 1.89221100  | 2.04086800  | -1.01127900 |
| C | 2.11252000  | 0.39150000  | 0.74526800  |
| C | 2.98009500  | 2.74675200  | -0.48999300 |
| H | 1.39015700  | 2.41200500  | -1.91036600 |
| C | 3.20935700  | 1.09215900  | 1.25985700  |
| H | 1.78291900  | -0.52476800 | 1.24049300  |
| C | 3.64413200  | 2.27158900  | 0.64662000  |
| H | 3.31683200  | 3.66500200  | -0.97930900 |
| H | 3.72472600  | 0.71394900  | 2.14732000  |
| H | 4.50151400  | 2.81710000  | 1.05037100  |
| C | 0.02608000  | -1.67407000 | -0.39675700 |
| C | -0.74488000 | -2.03794600 | 0.72034900  |
| C | 0.85135200  | -2.64697200 | -0.99288200 |
| C | -0.68590300 | -3.33961600 | 1.23181000  |
| H | -1.39652000 | -1.30427300 | 1.20038300  |
| C | 0.91913600  | -3.94286800 | -0.47431300 |
| H | 1.44651600  | -2.38786300 | -1.87424100 |
| C | 0.14709900  | -4.29374300 | 0.63922100  |
| H | -1.29354300 | -3.60694400 | 2.10103600  |
| H | 1.56936300  | -4.68399000 | -0.94758200 |
| H | 0.19147300  | -5.30989300 | 1.04069800  |

**MeOH**

|   |             |             |             |
|---|-------------|-------------|-------------|
| C | 0.65933200  | -0.01908400 | 0.00000000  |
| H | 1.10161500  | 0.99026400  | -0.00000100 |
| H | 1.03511400  | -0.55150700 | -0.89554200 |
| H | 1.03511500  | -0.55150600 | 0.89554200  |
| O | -0.74882800 | 0.12384100  | 0.00000000  |
| H | -1.13721100 | -0.76348000 | 0.00000000  |

**MeO-B(OH)<sub>2</sub>**

|   |             |             |             |
|---|-------------|-------------|-------------|
| B | 0.51523000  | -0.03383700 | -0.00011900 |
| O | 1.63821100  | -0.81875300 | 0.00005900  |
| H | 2.46568100  | -0.31709100 | 0.00255700  |
| O | 0.51336100  | 1.33446600  | 0.00028900  |
| H | 1.39814700  | 1.72675700  | -0.00307700 |
| O | -0.67396900 | -0.71054800 | -0.00065200 |
| C | -1.91401500 | -0.02261300 | 0.00027700  |
| H | -2.72015600 | -0.77171600 | -0.02631400 |
| H | -2.03853300 | 0.59163600  | 0.90876300  |
| H | -2.01801900 | 0.63395100  | -0.88055700 |

**Pd(PPh<sub>3</sub>)<sub>4</sub>**

|    |             |             |             |
|----|-------------|-------------|-------------|
| Pd | 0.00244700  | 0.00401000  | 0.00609900  |
| P  | 0.13873900  | 2.44658000  | 0.77164900  |
| P  | 2.03376100  | -1.30829900 | 0.88308400  |
| P  | -2.18446100 | -1.06508900 | 0.85691700  |
| P  | 0.01384800  | -0.07387300 | -2.50016400 |
| C  | 3.74198400  | -0.64991000 | 0.50639100  |
| C  | 4.82213600  | -1.45818300 | 0.11007600  |
| C  | 3.96475600  | 0.72987700  | 0.65714000  |
| C  | 6.08400500  | -0.90124100 | -0.12895200 |
| H  | 4.69161200  | -2.53454900 | -0.01089000 |
| C  | 5.22748000  | 1.28580200  | 0.43209500  |
| H  | 3.14202500  | 1.38131400  | 0.95487100  |
| C  | 6.29307400  | 0.47150600  | 0.03283500  |
| H  | 6.90873600  | -1.54934500 | -0.43888500 |
| H  | 5.37475900  | 2.36127000  | 0.56190500  |
| H  | 7.27992100  | 0.90506400  | -0.15120000 |
| C  | 2.23501000  | -3.07377900 | 0.30457800  |
| C  | 2.39103900  | -4.16777000 | 1.17325000  |
| C  | 2.22847500  | -3.32030700 | -1.08117400 |
| C  | 2.53435000  | -5.46742400 | 0.67061000  |
| H  | 2.40576800  | -4.01729800 | 2.25373400  |
| C  | 2.38388500  | -4.61506100 | -1.58319400 |
| H  | 2.11321600  | -2.48960100 | -1.77960400 |
| C  | 2.53399800  | -5.69690100 | -0.70807800 |
| H  | 2.65343600  | -6.30298400 | 1.36627900  |
| H  | 2.38307000  | -4.77806900 | -2.66452400 |
| H  | 2.65009300  | -6.71140600 | -1.09908700 |

|   |             |             |             |   |             |             |             |
|---|-------------|-------------|-------------|---|-------------|-------------|-------------|
| C | 2.17788400  | -1.54477300 | 2.73190500  | C | -1.36885200 | -3.75950900 | 0.76884900  |
| C | 3.39253800  | -1.45986900 | 3.43553100  | C | -3.81514500 | -4.82438600 | -0.03882900 |
| C | 1.00787800  | -1.83284300 | 3.45622500  | H | -4.54387900 | -2.80209700 | -0.02815600 |
| C | 3.43287500  | -1.65976500 | 4.82057500  | C | -1.50769900 | -5.14026900 | 0.60009200  |
| H | 4.32227800  | -1.24063900 | 2.90784300  | H | -0.40359400 | -3.35507400 | 1.07608200  |
| C | 1.04890100  | -2.04764400 | 4.83705900  | C | -2.73250300 | -5.67871800 | 0.19037700  |
| H | 0.05064100  | -1.88924400 | 2.93618200  | H | -4.77846300 | -5.23244300 | -0.35786700 |
| C | 2.26302700  | -1.95800400 | 5.52623400  | H | -0.65143000 | -5.79519200 | 0.78182500  |
| H | 4.38825100  | -1.58624000 | 5.34798700  | H | -2.84163100 | -6.75764500 | 0.04992100  |
| H | 0.12548100  | -2.27638400 | 5.37573100  | C | -2.52777000 | -0.99078300 | 2.69302800  |
| H | 2.29668100  | -2.11695700 | 6.60758200  | C | -3.06349500 | -2.06316700 | 3.42825000  |
| C | 1.65158200  | -0.37349900 | -3.34566000 | C | -2.24144600 | 0.20554100  | 3.37424300  |
| C | 1.82048200  | -1.24300700 | -4.43796700 | C | -3.30660200 | -1.93949000 | 4.80142000  |
| C | 2.77798900  | 0.31530600  | -2.86091500 | H | -3.30120500 | -3.00673400 | 2.93449300  |
| C | 3.07895900  | -1.41662800 | -5.02633900 | C | -2.49744900 | 0.33534300  | 4.74245900  |
| H | 0.96845100  | -1.79169500 | -4.84309000 | H | -1.81219900 | 1.04855500  | 2.83094400  |
| C | 4.03149300  | 0.15551100  | -3.45885300 | C | -3.02841200 | -0.73967600 | 5.46334300  |
| H | 2.67548400  | 0.98363300  | -2.00392300 | H | -3.72166100 | -2.78764200 | 5.35338100  |
| C | 4.18773800  | -0.71590600 | -4.54237600 | H | -2.27176200 | 1.27857500  | 5.24701100  |
| H | 3.18873000  | -2.10106400 | -5.87241700 | H | -3.22170500 | -0.64353000 | 6.53530400  |
| H | 4.89034500  | 0.70789700  | -3.06855300 | C | -3.79232600 | -0.38874500 | 0.18719600  |
| H | 5.16947600  | -0.85026200 | -5.00488100 | C | -4.85008400 | 0.05880900  | 0.99741200  |
| C | -1.03594900 | -1.37688000 | -3.32857900 | C | -3.95144800 | -0.32620900 | -1.20987700 |
| C | -1.02136500 | -2.67493400 | -2.78730800 | C | -6.02926100 | 0.55508400  | 0.42690400  |
| C | -1.83398600 | -1.13515600 | -4.46102300 | H | -4.76673700 | 0.02209000  | 2.08465100  |
| C | -1.76643600 | -3.70518700 | -3.36858600 | C | -5.13238700 | 0.15739400  | -1.77916800 |
| H | -0.42222900 | -2.88363300 | -1.89900600 | H | -3.14884800 | -0.67207700 | -1.86352200 |
| C | -2.59397800 | -2.16233200 | -5.03317200 | C | -6.17691200 | 0.60472500  | -0.96208400 |
| H | -1.86756600 | -0.14099800 | -4.91007800 | H | -6.83855400 | 0.89832300  | 1.07770400  |
| C | -2.56038500 | -3.45116000 | -4.49238600 | H | -5.23350000 | 0.18771300  | -2.86761700 |
| H | -1.73244800 | -4.70783900 | -2.93425300 | H | -7.09954800 | 0.98852200  | -1.40597200 |
| H | -3.21106500 | -1.95145000 | -5.91128600 | C | 1.55431800  | 3.47327800  | 0.11323300  |
| H | -3.15208400 | -4.25318000 | -4.94227700 | C | 2.44359700  | 4.19488100  | 0.92814900  |
| C | -0.56192300 | 1.45083900  | -3.41124700 | C | 1.73814700  | 3.52516700  | -1.28117700 |
| C | 0.08689400  | 1.97996100  | -4.54115200 | C | 3.48566700  | 4.94255300  | 0.36473900  |
| C | -1.71477200 | 2.10254900  | -2.93744800 | H | 2.33100400  | 4.18447400  | 2.01331900  |
| C | -0.40437800 | 3.12683700  | -5.17638200 | C | 2.76988800  | 4.28087200  | -1.84408400 |
| H | 0.98208200  | 1.49889000  | -4.93909700 | H | 1.05902000  | 2.97923500  | -1.93831100 |
| C | -2.21559600 | 3.23767200  | -3.58152000 | C | 3.65249900  | 4.99093800  | -1.02208100 |
| H | -2.22669100 | 1.71957000  | -2.05254100 | H | 4.16584600  | 5.49519100  | 1.01916200  |
| C | -1.55846000 | 3.75754400  | -4.70216000 | H | 2.88585600  | 4.31035500  | -2.93107400 |
| H | 0.11791600  | 3.52414900  | -6.05143300 | H | 4.46397400  | 5.57817100  | -1.46056600 |
| H | -3.11769700 | 3.72219700  | -3.19865700 | C | -1.29298100 | 3.57731200  | 0.36345100  |
| H | -1.94264300 | 4.65146400  | -5.20120100 | C | -1.13995700 | 4.90196100  | -0.08290200 |
| C | -2.45129800 | -2.88952200 | 0.55060800  | C | -2.59670300 | 3.08285600  | 0.54189100  |
| C | -3.67815600 | -3.44333300 | 0.14408400  | C | -2.25718400 | 5.70398300  | -0.34366500 |

|              |             |             |             |    |             |             |             |
|--------------|-------------|-------------|-------------|----|-------------|-------------|-------------|
| H            | -0.14465500 | 5.32534800  | -0.22567800 | C  | -0.83805700 | 5.61842100  | -1.39712300 |
| C            | -3.71356400 | 3.88672400  | 0.29518600  | H  | -2.17947000 | 4.00881600  | -1.89782100 |
| H            | -2.74422000 | 2.05571200  | 0.87778300  | C  | 0.47198800  | 5.33733300  | 0.61377800  |
| C            | -3.54793900 | 5.20156400  | -0.15371000 | H  | 0.18741200  | 3.49366200  | 1.68902500  |
| H            | -2.11353800 | 6.73058200  | -0.69256200 | C  | 0.11272100  | 6.10865100  | -0.49872100 |
| H            | -4.71643900 | 3.47879600  | 0.44680300  | H  | -1.12716600 | 6.21177700  | -2.26910000 |
| H            | -4.41995200 | 5.82992400  | -0.35488100 | H  | 1.21528700  | 5.71071500  | 1.32371000  |
| C            | 0.30447300  | 2.78347700  | 2.60347200  | H  | 0.57334200  | 7.08669000  | -0.66220300 |
| C            | -0.38488000 | 3.81191300  | 3.27044300  | C  | -0.58731800 | -3.21081100 | -1.36427600 |
| C            | 1.17111500  | 1.96888900  | 3.35352000  | C  | -0.36561500 | -4.56917900 | -1.08356300 |
| C            | -0.20919200 | 4.01843700  | 4.64396100  | C  | -0.18797900 | -2.70556500 | -2.61536700 |
| H            | -1.06451400 | 4.46660400  | 2.72259300  | C  | 0.24020400  | -5.40130600 | -2.03231800 |
| C            | 1.35880300  | 2.18326100  | 4.72217200  | H  | -0.66315000 | -4.98956300 | -0.12076900 |
| H            | 1.70723300  | 1.15458600  | 2.86429400  | C  | 0.40644000  | -3.53955800 | -3.56636600 |
| C            | 0.66536100  | 3.20823400  | 5.37462800  | H  | -0.33673600 | -1.64701500 | -2.84568800 |
| H            | -0.75768900 | 4.82297400  | 5.14213300  | C  | 0.62536500  | -4.89082000 | -3.27554800 |
| H            | 2.04349300  | 1.53937800  | 5.28056400  | H  | 0.41070600  | -6.45514700 | -1.79515400 |
| H            | 0.80384700  | 3.37269100  | 6.44677100  | H  | 0.71001500  | -3.12806600 | -4.53285900 |
| <b>int-1</b> |             |             |             | H  | 1.09938100  | -5.54246500 | -4.01467400 |
| P            | -1.37289300 | -2.03376400 | -0.16234800 | C  | -3.17730400 | -2.19294300 | -0.57207000 |
| P            | -1.75928100 | 1.88033000  | 0.21789700  | C  | -3.65326500 | -2.93681200 | -1.66445100 |
| C            | -3.27062700 | 1.86037600  | -0.85685400 | C  | -4.10669000 | -1.50040000 | 0.22731300  |
| C            | -3.12754100 | 1.33502100  | -2.15395500 | C  | -5.02386300 | -2.99120800 | -1.94655400 |
| C            | -4.53093800 | 2.33413600  | -0.45556700 | H  | -2.95871500 | -3.48375100 | -2.30448700 |
| C            | -4.21289000 | 1.29969700  | -3.03471100 | C  | -5.47429400 | -1.56545500 | -0.04832000 |
| H            | -2.15735500 | 0.94539400  | -2.47547500 | H  | -3.76249300 | -0.90783500 | 1.07836500  |
| C            | -5.61932100 | 2.28692300  | -1.33330500 | C  | -5.93833200 | -2.31005700 | -1.13943000 |
| H            | -4.67714300 | 2.73862500  | 0.54743900  | H  | -5.37458700 | -3.57542000 | -2.80191400 |
| C            | -5.46335900 | 1.77388000  | -2.62499700 | H  | -6.18054200 | -1.02642600 | 0.58893800  |
| H            | -4.08197500 | 0.89161600  | -4.04059400 | H  | -7.00845800 | -2.35624400 | -1.35891200 |
| H            | -6.59490700 | 2.65434800  | -1.00306600 | C  | -1.24773100 | -2.92751000 | 1.45877200  |
| H            | -6.31571600 | 1.73895800  | -3.30900000 | C  | -2.19573700 | -3.87146700 | 1.89209000  |
| C            | -2.39791200 | 2.03239600  | 1.95213700  | C  | -0.14526800 | -2.64810400 | 2.28662800  |
| C            | -2.96020500 | 3.21976400  | 2.45776300  | C  | -2.04202400 | -4.51971700 | 3.12218300  |
| C            | -2.29449300 | 0.91908700  | 2.80328000  | H  | -3.06140800 | -4.10810100 | 1.26981200  |
| C            | -3.42318400 | 3.28142800  | 3.77526500  | C  | 0.01069800  | -3.30204600 | 3.51279000  |
| H            | -3.03264400 | 4.10764200  | 1.82564900  | H  | 0.59455700  | -1.90797600 | 1.96950400  |
| C            | -2.75900100 | 0.98139400  | 4.12203100  | C  | -0.93904200 | -4.23811300 | 3.93499400  |
| H            | -1.83523200 | -0.00083700 | 2.43364100  | H  | -2.78923300 | -5.24985700 | 3.44524400  |
| C            | -3.32628200 | 2.16190700  | 4.60985800  | H  | 0.87419700  | -3.07225300 | 4.14300200  |
| H            | -3.85854700 | 4.21074800  | 4.15280000  | H  | -0.82191200 | -4.74472000 | 4.89688100  |
| H            | -2.66807900 | 0.10538800  | 4.76988900  | Pd | -0.21269300 | 0.08608500  | -0.17094300 |
| H            | -3.68566900 | 2.21404800  | 5.64122900  | C  | 1.76013500  | 0.78091200  | -0.45369300 |
| C            | -1.07911000 | 3.58692900  | -0.07441400 | C  | 1.74750600  | -0.49437100 | -0.52941400 |
| C            | -1.43368400 | 4.36806500  | -1.18587000 | H  | 2.28737800  | -1.42448400 | -0.68516100 |
| C            | -0.11204300 | 4.08573500  | 0.81953500  | C  | 2.51263200  | 2.05954100  | -0.52857600 |

|              |             |             |             |   |             |             |             |
|--------------|-------------|-------------|-------------|---|-------------|-------------|-------------|
| H            | 1.98145300  | 2.77206300  | -1.18099000 | H | 3.59987300  | 1.46668700  | -1.01408700 |
| H            | 2.55157700  | 2.53896700  | 0.45948500  | C | 4.15400000  | 4.02234200  | -3.20351500 |
| N            | 3.88891400  | 1.95654300  | -1.04557500 | H | 2.84315100  | 5.72093800  | -3.49500900 |
| C            | 4.07421500  | 1.72650300  | -2.47046500 | H | 5.25407200  | 2.22641400  | -2.69735300 |
| H            | 3.45672800  | 2.43847700  | -3.04316500 | H | 4.88233600  | 4.35633000  | -3.94734400 |
| H            | 5.12697100  | 1.92411500  | -2.73409000 | C | -0.53314700 | 3.26376400  | -0.54472400 |
| C            | 3.76562500  | 0.32051400  | -2.94686700 | C | -1.09582100 | 4.39528400  | 0.06697500  |
| O            | 3.23224200  | 0.08738300  | -4.01024300 | C | -1.20362300 | 2.66235000  | -1.62577900 |
| H            | 4.11267800  | -0.50265200 | -2.27878200 | C | -2.31202300 | 4.91215500  | -0.39399800 |
| S            | 5.18647700  | 1.94602800  | 0.00416800  | H | -0.59048100 | 4.88283400  | 0.90251800  |
| O            | 6.37229800  | 2.29854800  | -0.79492400 | C | -2.41182300 | 3.18791800  | -2.08930400 |
| O            | 4.80827400  | 2.78321200  | 1.15431800  | H | -0.77618200 | 1.78055500  | -2.11095900 |
| C            | 5.43046300  | 0.28151300  | 0.61768600  | C | -2.97079300 | 4.31228800  | -1.47084500 |
| C            | 6.25782200  | -0.59857900 | -0.09171200 | H | -2.74236800 | 5.79166500  | 0.09223000  |
| C            | 4.78811300  | -0.12178200 | 1.79158500  | H | -2.92203500 | 2.71267000  | -2.93113800 |
| C            | 6.42711600  | -1.89818900 | 0.38227500  | H | -3.92051600 | 4.71900000  | -1.82837300 |
| H            | 6.77337800  | -0.26898400 | -0.99565000 | C | 1.47676700  | -3.28263800 | 1.21612800  |
| C            | 4.97176400  | -1.42844200 | 2.25042600  | C | 0.15732700  | -3.61135700 | 1.58189700  |
| H            | 4.16074900  | 0.57585100  | 2.34912600  | C | 2.54067800  | -3.74218000 | 2.00984100  |
| C            | 5.78673100  | -2.33789700 | 1.55643700  | C | -0.08611200 | -4.39054600 | 2.71542100  |
| H            | 7.07609300  | -2.58589400 | -0.16730700 | H | -0.69042100 | -3.27360100 | 0.98283300  |
| H            | 4.47364800  | -1.74433100 | 3.17092600  | C | 2.28961200  | -4.51869800 | 3.14658800  |
| C            | 5.98354900  | -3.74706900 | 2.04826900  | H | 3.57250700  | -3.50101200 | 1.74772400  |
| H            | 5.63135200  | -4.47730300 | 1.30003000  | C | 0.97818700  | -4.84454500 | 3.50256100  |
| H            | 7.05205500  | -3.95930700 | 2.22110100  | H | -1.11636500 | -4.63893000 | 2.98400600  |
| H            | 5.44028100  | -3.92944400 | 2.98679000  | H | 3.12810000  | -4.87132600 | 3.75314400  |
| <b>int-2</b> |             |             |             | H | 0.78412500  | -5.45133300 | 4.39104300  |
| P            | 1.75205000  | -2.18775400 | -0.23796500 | C | 3.55288200  | -2.28945700 | -0.61197800 |
| P            | 1.08245700  | 2.54423200  | -0.03925000 | C | 4.08922500  | -3.17996100 | -1.55709300 |
| C            | 1.56037100  | 3.37698100  | 1.53224300  | C | 4.41554300  | -1.41473400 | 0.07564200  |
| C            | 0.74919800  | 3.22752300  | 2.67416000  | C | 5.46564800  | -3.19765000 | -1.80335700 |
| C            | 2.76426500  | 4.09609700  | 1.64210900  | H | 3.43763400  | -3.86335100 | -2.10532000 |
| C            | 1.13805500  | 3.78716900  | 3.89385400  | C | 5.79170300  | -1.44140400 | -0.16890800 |
| H            | -0.18577700 | 2.66632300  | 2.64241100  | H | 4.00843800  | -0.71164600 | 0.80847000  |
| C            | 3.14437800  | 4.65724000  | 2.86570600  | C | 6.31832300  | -2.33164700 | -1.11072300 |
| H            | 3.41372000  | 4.22421000  | 0.77420400  | H | 5.87255000  | -3.89400400 | -2.54143400 |
| C            | 2.33433900  | 4.50440800  | 3.99511700  | H | 6.45210700  | -0.76060800 | 0.37458100  |
| H            | 0.49827500  | 3.63933600  | 4.76791700  | H | 7.39365600  | -2.34846100 | -1.30730500 |
| H            | 4.08131800  | 5.21680000  | 2.93248600  | C | 0.89692800  | -3.00902400 | -1.64251700 |
| H            | 2.63614000  | 4.94043700  | 4.95127900  | C | 0.71503000  | -4.40148100 | -1.70985900 |
| C            | 2.27572700  | 3.16523000  | -1.29801900 | C | 0.43365200  | -2.20342200 | -2.69763400 |
| C            | 2.07324300  | 4.36358700  | -2.00363400 | C | 0.08192200  | -4.97416800 | -2.81704400 |
| C            | 3.42724000  | 2.40121900  | -1.55743200 | H | 1.06554400  | -5.04463700 | -0.89971900 |
| C            | 3.00962700  | 4.78730700  | -2.95100300 | C | -0.19394800 | -2.78059600 | -3.80538900 |
| H            | 1.18493600  | 4.97103700  | -1.81658200 | H | 0.56074600  | -1.11773900 | -2.64674200 |
| C            | 4.36288100  | 2.82933600  | -2.50445600 | C | -0.37216500 | -4.16668100 | -3.86531300 |

|              |             |             |             |   |             |             |             |
|--------------|-------------|-------------|-------------|---|-------------|-------------|-------------|
| H            | -0.05721700 | -6.05768500 | -2.85918200 | H | 0.17219900  | 4.38431200  | 4.68552900  |
| H            | -0.55027000 | -2.14440300 | -4.61981500 | H | -2.28880000 | 3.99647200  | 4.87709900  |
| H            | -0.86916400 | -4.61837600 | -4.72802300 | C | 1.89278700  | 3.82096100  | -0.07850900 |
| Pd           | 1.29379900  | 0.15307400  | -0.06097400 | C | 1.85794900  | 5.01856000  | -0.81178500 |
| C            | -0.31640400 | -0.12084000 | 1.09243400  | C | 3.06304100  | 3.49102200  | 0.63012600  |
| C            | -0.26750400 | 0.03921500  | 2.41354100  | C | 2.96622900  | 5.87205400  | -0.82580100 |
| C            | -1.57029100 | -0.50535000 | 0.34431600  | H | 0.97154300  | 5.29380000  | -1.38501800 |
| H            | -1.95037900 | 0.35461400  | -0.24077600 | C | 4.16557300  | 4.35029000  | 0.62079800  |
| H            | -1.36521000 | -1.31974700 | -0.36330200 | H | 3.11472800  | 2.55636500  | 1.19336400  |
| N            | -2.57580100 | -0.96430700 | 1.31563000  | C | 4.12034800  | 5.54261600  | -0.10857000 |
| C            | -2.78530100 | -0.05200200 | 2.44407600  | H | 2.92471300  | 6.79872100  | -1.40455200 |
| H            | -3.00298100 | 0.97121000  | 2.08042100  | H | 5.06556300  | 4.08084500  | 1.17988500  |
| H            | -3.63556900 | -0.39573200 | 3.04616200  | H | 4.98538900  | 6.21118000  | -0.12238400 |
| C            | -1.51718300 | 0.02511300  | 3.33967800  | C | -0.69160600 | 3.10480700  | -1.34135000 |
| O            | -1.54590600 | 1.08772800  | 4.16673300  | C | -1.42856600 | 4.30417700  | -1.32420300 |
| H            | -1.46548600 | -0.97415300 | 3.86974200  | C | -0.84998800 | 2.22237500  | -2.42337100 |
| S            | -3.81306200 | -1.93623100 | 0.77492400  | C | -2.29330300 | 4.61539700  | -2.37674500 |
| O            | -3.20756100 | -2.91421200 | -0.15081900 | H | -1.33603100 | 4.99767700  | -0.48550000 |
| O            | -4.52114400 | -2.42389100 | 1.97041800  | C | -1.71678300 | 2.53674400  | -3.47556500 |
| C            | -4.96740100 | -0.95067200 | -0.17627400 | H | -0.29535000 | 1.28065700  | -2.43624800 |
| C            | -4.77460400 | -0.79768200 | -1.55586300 | C | -2.43750800 | 3.73410300  | -3.45462900 |
| C            | -6.03401900 | -0.32066600 | 0.47327200  | H | -2.85966900 | 5.55021900  | -2.35282400 |
| C            | -5.65822900 | 0.00139400  | -2.27988200 | H | -1.83032900 | 1.84027900  | -4.31042600 |
| H            | -3.95397500 | -1.31058300 | -2.06062400 | H | -3.11671100 | 3.97993400  | -4.27539400 |
| C            | -6.90785500 | 0.47599200  | -0.27014600 | C | 1.62947200  | -3.11245000 | 1.00539100  |
| H            | -6.19319000 | -0.46214900 | 1.54375100  | C | 0.37025600  | -3.71385000 | 0.82399600  |
| C            | -6.73616700 | 0.65426400  | -1.65286300 | C | 2.38733200  | -3.45765100 | 2.13641700  |
| H            | -5.51306000 | 0.11460200  | -3.35806000 | C | -0.11726100 | -4.63774700 | 1.75101900  |
| H            | -7.74532600 | 0.96323300  | 0.23638200  | H | -0.24433800 | -3.46673100 | -0.04325800 |
| H            | 0.66032900  | 0.28427700  | 2.94104900  | C | 1.89749100  | -4.38691200 | 3.06202900  |
| C            | -7.67267800 | 1.52028200  | -2.45312800 | H | 3.36782500  | -3.00887100 | 2.30489400  |
| H            | -8.53074400 | 1.85457000  | -1.85184500 | C | 0.64544900  | -4.97857800 | 2.87399000  |
| H            | -7.15112200 | 2.41768600  | -2.82864600 | H | -1.10641000 | -5.07768500 | 1.59827800  |
| H            | -8.05555300 | 0.98198100  | -3.33577800 | H | 2.50345200  | -4.64798700 | 3.93395800  |
| <b>int-3</b> |             |             |             | H | 0.26372000  | -5.70210200 | 3.59941200  |
| P            | 2.19020900  | -1.83466300 | -0.20962600 | C | 4.00654700  | -1.70434600 | 0.09358200  |
| P            | 0.47392900  | 2.63760300  | 0.00644400  | C | 4.96305900  | -2.44449000 | -0.61885000 |
| C            | -0.41127600 | 3.13961900  | 1.55318100  | C | 4.43798200  | -0.81536900 | 1.09475800  |
| C            | -1.79636000 | 2.92228300  | 1.67179700  | C | 6.32454400  | -2.30318300 | -0.32806100 |
| C            | 0.28578700  | 3.66573600  | 2.65383600  | H | 4.65701100  | -3.13223000 | -1.40908800 |
| C            | -2.46550900 | 3.23080300  | 2.85880300  | C | 5.79749900  | -0.68359400 | 1.38958500  |
| H            | -2.36390800 | 2.51094000  | 0.83460700  | H | 3.70462700  | -0.21883600 | 1.64440100  |
| C            | -0.38738300 | 3.97142300  | 3.84180400  | C | 6.74474100  | -1.42682900 | 0.67678000  |
| H            | 1.36006500  | 3.84792200  | 2.59556000  | H | 7.05918000  | -2.88235500 | -0.89408000 |
| C            | -1.76383000 | 3.75588100  | 3.94875000  | H | 6.11755000  | 0.00846000  | 2.17308900  |
| H            | -3.54230800 | 3.05623800  | 2.93097500  | H | 7.80938600  | -1.31860900 | 0.90108800  |



C 1.99124700 -2.69145500 -1.82995200  
C 2.22903000 -4.07034000 -1.98210700  
C 1.58681300 -1.94187700 -2.94668800  
C 2.07117300 -4.67974800 -3.22982800  
H 2.53388500 -4.67613500 -1.12594200  
C 1.42876200 -2.55500500 -4.19389100  
H 1.39199700 -0.87410900 -2.83653100  
C 1.67150800 -3.92398200 -4.33785000  
H 2.25900200 -5.75165200 -3.33540200  
H 1.11036500 -1.95917000 -5.05341000  
H 1.54473500 -4.40470000 -5.31168100  
Pd 1.24050300 0.38065100 -0.17647800  
C -0.30650300 -0.26341700 0.95824400  
C -0.32857700 -0.32820800 2.30010200  
C -1.49318900 -0.75095300 0.15189100  
H -2.05309000 0.11954500 -0.24797500  
H -1.15432500 -1.33579000 -0.71272500  
N -2.37553200 -1.60485700 0.96878600  
C -2.74625100 -1.03783700 2.26356300  
H -3.22544600 -0.04822100 2.13921000  
H -3.45418800 -1.70304000 2.77356200  
C -1.48629300 -0.86523700 3.11429500  
O -1.85328800 0.01760000 4.17676700  
H -1.20726000 -1.85068200 3.53944200  
S -3.45032700 -2.62221600 0.20392000  
O -2.75828000 -3.13472400 -0.99319400  
O -3.92955000 -3.57649300 1.21929600  
C -4.85826800 -1.66738500 -0.35279300  
C -4.80112000 -1.01337700 -1.59149500  
C -5.98598000 -1.55682300 0.46661000  
C -5.88506400 -0.23769200 -1.99821700  
H -3.92719600 -1.12094500 -2.23655700  
C -7.06231800 -0.77539800 0.03951100  
H -6.03201700 -2.08589700 1.42001400  
C -7.03168300 -0.10203300 -1.19259400  
H -5.84376900 0.26993700 -2.96606700  
H -7.94661500 -0.69387800 0.67720700  
H 0.53553300 0.00037800 2.89303200  
C -8.18993500 0.74215700 -1.65396500  
H -9.01972400 0.72400000 -0.93245400  
H -7.88015500 1.79175400 -1.79428600  
H -8.57162600 0.39088000 -2.62734400  
H -1.09311800 0.10231200 4.77175300  
O 2.90478000 0.88094300 -1.38806600  
C 2.76803900 1.57340500 -2.58256900  
H 3.76350400 1.77304800 -3.04182800

H 2.18761500 1.02901600 -3.36526700  
H 2.27959500 2.56963200 -2.48588700  
**int-4**  
P -1.16801900 2.14321700 0.00099400  
P -2.60624100 -1.49582400 -0.39241100  
C -4.06311800 -0.77727400 -1.29945000  
C -3.78341100 0.00489700 -2.43511200  
C -5.40251400 -1.03771500 -0.97077900  
C -4.81734400 0.50599900 -3.22839000  
H -2.74677700 0.21526200 -2.71231000  
C -6.43860000 -0.52623500 -1.76246200  
H -5.65277300 -1.64918200 -0.10235200  
C -6.15091200 0.24299100 -2.89268500  
H -4.58077900 1.10695000 -4.11049700  
H -7.47672200 -0.74036400 -1.49354100  
H -6.96164700 0.63651200 -3.51173500  
C -3.35665200 -2.44394500 1.00111100  
C -3.18998400 -3.82672700 1.17909400  
C -4.02285200 -1.70872700 2.00111000  
C -3.69884600 -4.46216700 2.31794000  
H -2.65057700 -4.41973300 0.43915200  
C -4.53745900 -2.34694800 3.13221700  
H -4.14134700 -0.62630800 1.89984600  
C -4.37839400 -3.72806900 3.29341500  
H -3.55763900 -5.53948000 2.44020200  
H -5.05880200 -1.76062600 3.89368600  
H -4.77676400 -4.22753400 4.18064400  
C -2.09891000 -2.72340400 -1.68466800  
C -2.95981100 -3.74882100 -2.11834700  
C -0.87134400 -2.54487100 -2.34196700  
C -2.58252500 -4.59414700 -3.16461000  
H -3.93624900 -3.88581000 -1.64775900  
C -0.50032600 -3.38416500 -3.39905600  
H -0.20528500 -1.73731300 -2.02731600  
C -1.35121100 -4.41461800 -3.80679000  
H -3.25798300 -5.39146400 -3.48651300  
H 0.45819700 -3.23018000 -3.90192500  
H -1.06078000 -5.07397600 -4.62926600  
C 0.08864100 2.95960200 -1.07519800  
C 1.11629700 3.78065000 -0.58288000  
C 0.07892200 2.63735700 -2.44680400  
C 2.09152300 4.29129300 -1.44866100  
H 1.18009200 4.01389300 0.48088200  
C 1.04853200 3.15495700 -3.30917100  
H -0.69202300 1.97463900 -2.84947700  
C 2.05754100 3.98793500 -2.81231800

H 2.88355800 4.92973700 -1.04798500  
H 1.01815200 2.90089800 -4.37211400  
H 2.81844600 4.39189000 -3.48549300  
C -2.79614200 2.81584000 -0.60343900  
C -2.93114600 3.75759800 -1.63522200  
C -3.94913300 2.40119900 0.08878600  
C -4.19144900 4.27126700 -1.96673600  
H -2.05717500 4.11105400 -2.18417500  
C -5.20303700 2.92270800 -0.23534800  
H -3.86734900 1.67201900 0.89944500  
C -5.32887700 3.85956400 -1.26815100  
H -4.27735000 5.00575000 -2.77239100  
H -6.08616100 2.59325900 0.31845400  
H -6.31050100 4.26686000 -1.52486900  
C -1.13878700 3.01974200 1.63355600  
C -1.15043800 4.42386000 1.72377800  
C -1.23724500 2.26288900 2.81167900  
C -1.22765700 5.05187700 2.96938700  
H -1.11010300 5.03588400 0.81961400  
C -1.32746000 2.89341400 4.05801700  
H -1.24815500 1.17154800 2.74941700  
C -1.31554300 4.28827100 4.13966300  
H -1.22878300 6.14388600 3.02553900  
H -1.40499700 2.28952500 4.96611600  
H -1.38139000 4.78235600 5.11286200  
Pd -0.63610900 -0.23357600 0.37042000  
C 1.30578000 0.35461000 0.77128300  
C 1.79559600 0.88531100 1.90567100  
C 2.22563300 0.11157300 -0.40679000  
H 2.01308400 0.84050900 -1.20854200  
H 2.05525700 -0.87883200 -0.84628700  
N 3.67324700 0.22620400 -0.09582600  
C 3.99742200 1.35308100 0.78472800  
H 3.71296600 2.27204200 0.24712000  
H 5.08422300 1.40047400 0.95425900  
C 3.22654200 1.31983900 2.11179200  
O 3.20964700 2.62621000 2.69625700  
H 3.72665500 0.62172600 2.81084000  
S 4.52927600 -1.19276000 0.16205100  
O 3.95960500 -2.20364800 -0.75047400  
O 4.62564400 -1.54593300 1.59621200  
C 6.17656100 -0.78481800 -0.40280700  
C 6.38114200 -0.51972200 -1.76102700  
C 7.24277200 -0.79466600 0.50139100  
C 7.67411300 -0.25020500 -2.20929100  
H 5.54402300 -0.52318000 -2.46240000

C 8.52871400 -0.52238300 0.03340700  
H 7.06679300 -1.01427100 1.55564000  
C 8.76756400 -0.24551200 -1.32433000  
H 7.83850100 -0.04154000 -3.26979400  
H 9.36495200 -0.52699500 0.73829000  
H 1.16083000 1.03337600 2.78604000  
H 4.10690700 2.82947300 3.00238700  
C 0.03395900 -1.98635000 1.24757400  
C 0.76322000 -3.01770500 0.62747500  
C -0.24971600 -2.14586200 2.62125500  
C 1.17700200 -4.15743800 1.33476400  
H 1.02995900 -2.94899900 -0.42928900  
C 0.15776400 -3.28095700 3.33402000  
H -0.80187400 -1.36988200 3.16145300  
C 0.87474100 -4.29774400 2.69207500  
H 1.74482900 -4.93662300 0.81595800  
H -0.08422300 -3.36817000 4.39820500  
H 1.19697100 -5.18494700 3.24501400  
C 10.16340100 0.04530800 -1.80823100  
H 10.58530000 0.92290900 -1.28988200  
H 10.83752200 -0.80221100 -1.59809400  
H 10.18636800 0.24184400 -2.88994000

**int-5**

P -1.13633900 1.92887900 -0.28768500  
P -2.54850300 -1.77488000 0.05713700  
C -3.99086600 -1.31279600 -1.01269600  
C -3.69817200 -0.87447200 -2.31732900  
C -5.33377000 -1.42875800 -0.62045200  
C -4.72560100 -0.57103200 -3.21332200  
H -2.65744000 -0.77632500 -2.63977600  
C -6.36207400 -1.11364800 -1.51716100  
H -5.59041500 -1.77089400 0.38394000  
C -6.06230700 -0.68762400 -2.81409100  
H -4.48142400 -0.23652200 -4.22514300  
H -7.40351700 -1.20905500 -1.19762100  
H -6.86754100 -0.44565600 -3.51294900  
C -3.27322900 -2.14073700 1.71709000  
C -3.13073700 -3.38722900 2.34831100  
C -3.88862200 -1.08990300 2.42456400  
C -3.60703800 -3.58222400 3.65020500  
H -2.64221800 -4.21562200 1.83216100  
C -4.37200100 -1.29059200 3.71975700  
H -3.99439000 -0.10511100 1.96267700  
C -4.23226600 -2.53869600 4.33757900  
H -3.48637700 -4.55913500 4.12631900  
H -4.85457400 -0.46524900 4.25012400

H -4.60570800 -2.69417800 5.35330200  
C -2.14455300 -3.43138700 -0.67390900  
C -3.15277400 -4.39303700 -0.87860500  
C -0.83526000 -3.72605100 -1.08424500  
C -2.85032500 -5.62475400 -1.46294900  
H -4.18292200 -4.18305300 -0.58060900  
C -0.53506500 -4.95796600 -1.67827200  
H -0.04492200 -2.98701600 -0.93869500  
C -1.53964300 -5.91025500 -1.86537900  
H -3.64278200 -6.36392800 -1.60867700  
H 0.48997800 -5.16957300 -1.99435500  
H -1.30546100 -6.87321600 -2.32750100  
C 0.22805700 2.57404600 -1.35080800  
C 1.19213100 3.48979800 -0.89897900  
C 0.37063600 2.02297800 -2.63982600  
C 2.25386100 3.86937000 -1.72979600  
H 1.13771000 3.90060300 0.11023900  
C 1.42509300 2.41147200 -3.46995300  
H -0.34647100 1.28143800 -3.00250700  
C 2.36938400 3.34042800 -3.01805800  
H 2.99486300 4.58379700 -1.36102300  
H 1.51261700 1.98045000 -4.47092900  
H 3.19702800 3.64275600 -3.66531500  
C -2.69177200 2.47269100 -1.15446000  
C -2.72050500 3.17031400 -2.37222500  
C -3.90967400 2.20174500 -0.50301900  
C -3.93902800 3.58502700 -2.92472500  
H -1.79546700 3.40951800 -2.89849100  
C -5.12249400 2.62555700 -1.04956500  
H -3.91217100 1.66557700 0.44926900  
C -5.14159300 3.31707900 -2.26668000  
H -3.94096500 4.12951300 -3.87306100  
H -6.05682600 2.41157700 -0.52394100  
H -6.09082000 3.64687300 -2.69743100  
C -1.23286700 3.03979100 1.18863300  
C -1.30958200 4.43923300 1.06126900  
C -1.33643100 2.46579300 2.46542500  
C -1.46078000 5.24445500 2.19252300  
H -1.25936400 4.90595100 0.07445100  
C -1.49774300 3.27370100 3.59728600  
H -1.29679500 1.37834400 2.57158700  
C -1.55415900 4.66331300 3.46331000  
H -1.51371700 6.33088400 2.08089000  
H -1.57918700 2.81224100 4.58506300  
H -1.67697800 5.29561300 4.34690000  
Pd -0.61581900 -0.38203800 0.39404600

C 1.32657500 0.18847500 0.84065700  
C 1.74616800 0.86441600 1.92749500  
C 2.33367700 -0.24318900 -0.20613000  
H 2.18954400 0.34515300 -1.13025400  
H 2.18306800 -1.29190600 -0.48973000  
N 3.75314900 -0.08019600 0.19425200  
C 4.02776300 1.16170100 0.92210700  
H 3.78137300 1.99694400 0.24623100  
H 5.10143000 1.23664900 1.15398600  
C 3.16893000 1.30104900 2.18622900  
O 3.13691400 2.66819300 2.60808100  
H 3.60735800 0.68604400 2.99588600  
S 4.61351800 -1.43266200 0.67603100  
O 4.01470700 -2.59157100 -0.01381700  
O 4.75689100 -1.50692500 2.14658800  
C 6.24606500 -1.15362700 -0.00148800  
C 6.41165700 -1.14031000 -1.39089100  
C 7.33801500 -1.00368500 0.85787100  
C 7.69078200 -0.96423500 -1.91723400  
H 5.55454400 -1.26390300 -2.05647600  
C 8.61048900 -0.82783500 0.31171900  
H 7.19228100 -1.02486200 1.93901000  
C 8.81026000 -0.80595700 -1.07943500  
H 7.82431500 -0.95033900 -3.00227000  
H 9.46582100 -0.70633200 0.98228100  
H 1.04880400 1.16368100 2.71754600  
H 4.01153500 2.89294900 2.96106900  
C 10.19261300 -0.63706000 -1.65195100  
H 10.74152000 0.17026100 -1.14107500  
H 10.78398200 -1.56007300 -1.51903200  
H 10.16157800 -0.41199000 -2.72813400  
H -0.05435400 -1.72497700 1.00067600

**int-6**

P -2.39520700 -0.00895000 0.00309500  
P 2.40800600 -0.02142500 0.01119800  
C 3.24607600 -1.07784000 1.27686300  
C 3.26245700 -2.47220300 1.08213100  
C 3.81569700 -0.55348800 2.44919000  
C 3.83905000 -3.31659700 2.03345700  
H 2.83352500 -2.90729700 0.17749500  
C 4.38984900 -1.40318400 3.40160100  
H 3.82652800 0.52217400 2.62950300  
C 4.40319600 -2.78536900 3.19853400  
H 3.84667900 -4.39639000 1.86182200  
H 4.83299500 -0.97545700 4.30498000  
H 4.85356000 -3.44723500 3.94314000

|   |             |             |             |              |             |             |             |
|---|-------------|-------------|-------------|--------------|-------------|-------------|-------------|
| C | 3.02348000  | 1.68566100  | 0.32826800  | C            | -2.09734200 | 1.63359800  | 2.25777000  |
| C | 3.96960500  | 2.32855500  | -0.48620200 | C            | -4.81529500 | 1.68871600  | 2.91061300  |
| C | 2.49036100  | 2.37825100  | 1.43193400  | H            | -5.11220500 | 0.41840600  | 1.19576700  |
| C | 4.38624000  | 3.63128500  | -0.19097800 | C            | -2.53346800 | 2.34992800  | 3.37766000  |
| H | 4.38640400  | 1.82178500  | -1.35818700 | H            | -1.03299000 | 1.59664300  | 2.01277600  |
| C | 2.92053500  | 3.67344600  | 1.73231200  | C            | -3.89231500 | 2.38222300  | 3.70258900  |
| H | 1.73588100  | 1.90184900  | 2.06357700  | H            | -5.87817200 | 1.70328900  | 3.16630000  |
| C | 3.86948100  | 4.30381900  | 0.92018600  | H            | -1.80625100 | 2.87892700  | 3.99925200  |
| H | 5.12117200  | 4.12019600  | -0.83614700 | H            | -4.23369900 | 2.94088400  | 4.57830100  |
| H | 2.50414600  | 4.19467300  | 2.59841700  | Pd           | 0.01255400  | -0.07919600 | -0.05466500 |
| H | 4.20009500  | 5.32034100  | 1.14981300  | O            | 0.13260600  | 1.62939600  | -1.16373600 |
| C | 3.16114800  | -0.56814900 | -1.57685800 | O            | -0.01133000 | -1.86284100 | 0.91687000  |
| C | 4.53846500  | -0.83423000 | -1.69210200 | C            | -0.34254800 | 2.83867700  | -0.66229500 |
| C | 2.33438800  | -0.73663500 | -2.70008500 | H            | -0.14877300 | 3.65018300  | -1.39748500 |
| C | 5.07515500  | -1.25094200 | -2.91278500 | H            | -1.43857000 | 2.85118400  | -0.47286600 |
| H | 5.19658100  | -0.71984300 | -0.82743900 | H            | 0.14713600  | 3.15966600  | 0.28243100  |
| C | 2.87578200  | -1.15359900 | -3.92096000 | C            | -0.07716300 | -2.94444100 | 0.03559600  |
| H | 1.26096800  | -0.55086500 | -2.61498600 | H            | -0.08491200 | -3.89826500 | 0.60593200  |
| C | 4.24547500  | -1.40991000 | -4.02913300 | H            | -0.99238000 | -2.95063000 | -0.59543800 |
| H | 6.14638500  | -1.45488200 | -2.99171100 | H            | 0.78529800  | -3.00483000 | -0.66463500 |
| H | 2.22161500  | -1.28332300 | -4.78712200 | <b>int-7</b> |             |             |             |
| H | 4.66815400  | -1.73905200 | -4.98228500 | P            | -2.39639400 | 0.22097900  | -0.01032200 |
| C | -3.08915400 | 0.75824200  | -1.52166700 | P            | 2.40878200  | 0.23957600  | -0.04339700 |
| C | -4.09602100 | 1.73702400  | -1.52095100 | C            | 3.20318400  | 1.67874300  | -0.90603100 |
| C | -2.54190500 | 0.34148400  | -2.75005800 | C            | 3.20622200  | 2.92961400  | -0.25904000 |
| C | -4.55598500 | 2.27658300  | -2.72716200 | C            | 3.75731600  | 1.58678000  | -2.19357900 |
| H | -4.52504700 | 2.09218700  | -0.58266200 | C            | 3.75497900  | 4.05261500  | -0.88253500 |
| C | -3.01127500 | 0.87523100  | -3.95317900 | H            | 2.79139300  | 3.03141600  | 0.74526800  |
| H | -1.74708400 | -0.40895800 | -2.76621800 | C            | 4.30321600  | 2.71490100  | -2.81655800 |
| C | -4.01903000 | 1.84556200  | -3.94392300 | H            | 3.78133100  | 0.63440200  | -2.72374600 |
| H | -5.33853200 | 3.04001000  | -2.71177000 | C            | 4.30385200  | 3.95076500  | -2.16530200 |
| H | -2.58158400 | 0.53723900  | -4.89988000 | H            | 3.75327700  | 5.01304100  | -0.35998600 |
| H | -4.38105000 | 2.26951700  | -4.88444700 | H            | 4.73463100  | 2.61908700  | -3.81666700 |
| C | -3.28513100 | -1.61845700 | 0.17518600  | H            | 4.73310600  | 4.83055200  | -2.65217100 |
| C | -3.94702000 | -2.23393300 | -0.89984300 | C            | 3.18326300  | -1.24437000 | -0.82300000 |
| C | -3.25000100 | -2.27544000 | 1.42024800  | C            | 4.11151600  | -2.06777700 | -0.16555500 |
| C | -4.56318200 | -3.47939200 | -0.73284600 | C            | 2.78424500  | -1.58256800 | -2.13044600 |
| H | -3.99356600 | -1.74630000 | -1.87508600 | C            | 4.64750900  | -3.18804000 | -0.81147300 |
| C | -3.86533000 | -3.51872300 | 1.58159900  | H            | 4.42234500  | -1.84842300 | 0.85672300  |
| H | -2.74499300 | -1.81551000 | 2.27235200  | C            | 3.33243400  | -2.69225300 | -2.77792900 |
| C | -4.52269600 | -4.12587200 | 0.50542500  | H            | 2.03518600  | -0.97807300 | -2.64749700 |
| H | -5.07935100 | -3.94208300 | -1.57837500 | C            | 4.26762500  | -3.49848700 | -2.11968400 |
| H | -3.83168800 | -4.01517700 | 2.55518300  | H            | 5.36778500  | -3.81912600 | -0.28379800 |
| H | -5.00492700 | -5.09861300 | 0.63431100  | H            | 3.01805000  | -2.93399600 | -3.79672000 |
| C | -3.01751800 | 0.94494400  | 1.45062200  | H            | 4.69163500  | -4.37156500 | -2.62304300 |
| C | -4.38256600 | 0.96880100  | 1.79433200  | C            | 3.11488700  | 0.36008900  | 1.65537600  |

|    |             |             |             |              |             |             |             |
|----|-------------|-------------|-------------|--------------|-------------|-------------|-------------|
| C  | 4.49084000  | 0.56395400  | 1.87267300  | H            | -0.14461400 | 4.09114400  | 1.15217300  |
| C  | 2.25405900  | 0.27955600  | 2.76162100  | H            | -0.95752400 | 2.67208600  | 1.84317600  |
| C  | 4.99180000  | 0.66564400  | 3.17246500  | H            | 0.81322500  | 2.80805300  | 1.91911900  |
| H  | 5.17621400  | 0.64853600  | 1.02594200  | C            | -0.02731700 | -1.77314900 | 0.02178400  |
| C  | 2.75852000  | 0.38255200  | 4.06321800  | C            | -0.27483600 | -2.54288900 | -1.13267400 |
| H  | 1.18060400  | 0.15155900  | 2.60055200  | C            | 0.18518300  | -2.48341600 | 1.22178000  |
| C  | 4.12724800  | 0.57216200  | 4.27005700  | C            | -0.31458400 | -3.94419600 | -1.09309800 |
| H  | 6.06239800  | 0.82245800  | 3.32927500  | H            | -0.44210700 | -2.05303200 | -2.09471300 |
| H  | 2.07632400  | 0.32045800  | 4.91516200  | C            | 0.15156000  | -3.88415000 | 1.26875400  |
| H  | 4.52228500  | 0.65482700  | 5.28620600  | H            | 0.38001300  | -1.94439400 | 2.15295900  |
| C  | -3.10130800 | -1.09444900 | 1.07051500  | C            | -0.10102500 | -4.62511200 | 0.10937900  |
| C  | -3.84533600 | -2.18287200 | 0.58877300  | H            | -0.51317500 | -4.50467700 | -2.01246900 |
| C  | -2.78844600 | -1.03928900 | 2.44257300  | H            | 0.32322200  | -4.39717800 | 2.22061400  |
| C  | -4.29167700 | -3.17814800 | 1.46629900  | H            | -0.13063400 | -5.71810500 | 0.14314600  |
| H  | -4.07560100 | -2.27228900 | -0.47360700 | <b>int-8</b> |             |             |             |
| C  | -3.24794700 | -2.02619500 | 3.31747800  | P            | 1.31162800  | 2.55381700  | -0.20209600 |
| H  | -2.17184100 | -0.22446400 | 2.83175900  | C            | 0.43688300  | 3.27236000  | 1.25125800  |
| C  | -4.00410300 | -3.09874400 | 2.83117400  | C            | -0.83910300 | 3.85373400  | 1.17192300  |
| H  | -4.86811900 | -4.02050000 | 1.07436400  | C            | 1.05813000  | 3.16545900  | 2.51050400  |
| H  | -3.00398800 | -1.96223700 | 4.38124800  | C            | -1.46512100 | 4.34574900  | 2.32306300  |
| H  | -4.35863800 | -3.87553600 | 3.51399100  | H            | -1.35846400 | 3.92528800  | 0.21537200  |
| C  | -3.30141200 | 1.77199400  | 0.46265700  | C            | 0.43635200  | 3.67100400  | 3.65474700  |
| C  | -4.07682400 | 1.89890400  | 1.62643600  | H            | 2.03526200  | 2.68433100  | 2.60147400  |
| C  | -3.19239500 | 2.87912600  | -0.40165000 | C            | -0.82692300 | 4.26595100  | 3.56349000  |
| C  | -4.72372900 | 3.10504600  | 1.92150400  | H            | -2.45856800 | 4.79534800  | 2.24381300  |
| H  | -4.19650100 | 1.05885200  | 2.31130700  | H            | 0.93778200  | 3.58948000  | 4.62251200  |
| C  | -3.83771300 | 4.08078200  | -0.10294800 | H            | -1.31587200 | 4.65713200  | 4.45965400  |
| H  | -2.60649900 | 2.80593200  | -1.32027000 | C            | 2.83648700  | 3.58550600  | -0.42279100 |
| C  | -4.60434400 | 4.19959200  | 1.06194700  | C            | 3.23202100  | 4.60514000  | 0.45700000  |
| H  | -5.32786800 | 3.18152300  | 2.82966000  | C            | 3.62387600  | 3.32566300  | -1.56106000 |
| H  | -3.74263200 | 4.92824800  | -0.78729600 | C            | 4.39420500  | 5.34505700  | 0.20653100  |
| H  | -5.11051600 | 5.14045600  | 1.29424600  | H            | 2.63675600  | 4.84044700  | 1.34022900  |
| C  | -3.05013800 | -0.03293900 | -1.71683500 | C            | 4.78188700  | 4.06585500  | -1.80743700 |
| C  | -4.43103100 | -0.14360000 | -1.96793600 | H            | 3.32504100  | 2.54947900  | -2.26936800 |
| C  | -2.15895700 | -0.01217200 | -2.80138200 | C            | 5.17337300  | 5.07631400  | -0.92145400 |
| C  | -4.90188800 | -0.26519200 | -3.27720100 | H            | 4.68565800  | 6.13867000  | 0.89989500  |
| H  | -5.14537100 | -0.12496300 | -1.14133200 | H            | 5.38070900  | 3.85187500  | -2.69683200 |
| C  | -2.63436500 | -0.12549800 | -4.11312200 | H            | 6.08103400  | 5.65464400  | -1.11412300 |
| H  | -1.08858900 | 0.11120100  | -2.61702900 | C            | 0.36122100  | 3.06235500  | -1.70348600 |
| C  | -4.00429600 | -0.25990100 | -4.35206200 | C            | 0.07945600  | 4.42115400  | -1.94462100 |
| H  | -5.97597900 | -0.35618000 | -3.46003300 | C            | -0.00772700 | 2.11064300  | -2.66673800 |
| H  | -1.92931000 | -0.10472500 | -4.94830500 | C            | -0.58491200 | 4.80964500  | -3.10964800 |
| H  | -4.37642400 | -0.35099100 | -5.37615700 | H            | 0.38562500  | 5.18382100  | -1.22454200 |
| Pd | 0.00293900  | 0.26988600  | 0.01602300  | C            | -0.66852100 | 2.50363100  | -3.83694500 |
| O  | 0.03408600  | 2.37305300  | 0.01009300  | H            | 0.23558500  | 1.05849100  | -2.51333300 |
| C  | -0.06425400 | 2.98410800  | 1.25290000  | C            | -0.96430200 | 3.85083400  | -4.05711600 |

H -0.80154000 5.86740500 -3.28160300  
H -0.94744600 1.75006000 -4.57812500  
H -1.48199500 4.15756600 -4.97002200  
Pd 1.67812500 0.19119300 -0.05833700  
O 3.77520800 0.35378500 -0.21049700  
C 4.38232300 0.70241700 0.99046000  
H 4.10603400 1.71944800 1.35535300  
H 4.15852900 0.00225300 1.82775200  
H 5.49160500 0.70871400 0.89126000  
C -0.89777900 0.01403100 2.51171900  
C -1.82408900 0.42528100 3.49774300  
C 0.37780900 -0.38280600 2.97331900  
C -1.49195200 0.44505400 4.85613600  
H -2.82554200 0.74997800 3.21354400  
C 0.71196200 -0.36551200 4.32851700  
H 1.12227100 -0.71653100 2.24870900  
C -0.22178500 0.04970700 5.28466000  
H -2.23802500 0.77652300 5.58413000  
H 1.71087000 -0.68491400 4.63959600  
H 0.03620100 0.06139500 6.34709300  
C -1.23707600 -0.00879500 1.05746000  
C -0.32870600 0.00256200 0.04419900  
H -0.78648500 -0.03738400 -0.95467400  
C -2.71779700 0.00615300 0.66023800  
H -3.32224500 0.59934900 1.36035300  
H -2.80550700 0.50378900 -0.31121200  
N -3.34427300 -1.33120600 0.51774200  
C -3.61582500 -2.13438400 1.69667700  
H -3.91464000 -3.15431700 1.40440200  
H -2.68562100 -2.26938200 2.27721100  
C -4.67263000 -1.60675300 2.63441400  
O -5.36731500 -0.63640500 2.42357300  
H -4.77911700 -2.20317900 3.57411300  
S -4.10668000 -1.68837000 -0.92351700  
O -3.19752200 -1.28363600 -2.01176200  
O -4.53336900 -3.09810000 -0.83405400  
C -5.58269300 -0.68674200 -1.08108900  
C -5.52665000 0.52868600 -1.77413200  
C -6.77701400 -1.13322400 -0.50615700  
C -6.68094000 1.30428900 -1.87554300  
H -4.59763100 0.85722400 -2.24278600  
C -7.92200000 -0.34371200 -0.62229400  
H -6.81899200 -2.08991200 0.01739500  
C -7.89545500 0.88635500 -1.30158600  
H -6.63951000 2.25207800 -2.41970200  
H -8.85748900 -0.69401200 -0.17794900

P 2.17904900 -2.14199500 -0.35384300  
C 0.90813000 -3.48228300 -0.22476100  
C 1.11443400 -4.68439000 0.47346200  
C -0.29877400 -3.30333500 -0.92517800  
C 0.13277000 -5.68178300 0.47367800  
H 2.04480300 -4.86031600 1.01476100  
C -1.27345000 -4.30445300 -0.92943900  
H -0.48181300 -2.38162200 -1.48073300  
C -1.06201600 -5.49558300 -0.22648000  
H 0.31067100 -6.61124800 1.02150900  
H -2.20716200 -4.14488500 -1.47182600  
H -1.82748800 -6.27639900 -0.22655900  
C 2.80607000 -2.41087100 -2.07216000  
C 3.18937200 -3.69365200 -2.50627100  
C 2.86233100 -1.33951900 -2.97720900  
C 3.63105200 -3.89313000 -3.81615400  
H 3.14316900 -4.54441500 -1.82184900  
C 3.30190600 -1.54290200 -4.29043900  
H 2.55537100 -0.34220000 -2.65428800  
C 3.68873700 -2.81785000 -4.71119500  
H 3.92826200 -4.89411400 -4.14046500  
H 3.33877000 -0.69932300 -4.98488000  
H 4.03156300 -2.97700100 -5.73721900  
C 3.54647800 -2.67337600 0.76195200  
C 4.86631600 -2.81938900 0.30369100  
C 3.28223100 -2.84122600 2.13428000  
C 5.89436800 -3.14203700 1.19608500  
H 5.10371100 -2.67818200 -0.75183000  
C 4.31005400 -3.17357200 3.02129800  
H 2.26675200 -2.72100800 2.51827400  
C 5.62028100 -3.32427200 2.55463600  
H 6.91608600 -3.25163500 0.82251800  
H 4.08442400 -3.31029800 4.08232900  
H 6.42540400 -3.57970300 3.24880900  
C -9.12920900 1.74100900 -1.42171300  
H -8.98056600 2.71644400 -0.92783100  
H -9.36279100 1.95225200 -2.47867200  
H -10.00495500 1.25719900 -0.96529400  
**int-9**  
P -2.71299000 -1.86542700 -0.50033100  
C -3.19254000 -2.88009800 0.95492300  
C -3.34634700 -4.27619900 0.89407400  
C -3.46444000 -2.20995600 2.16039100  
C -3.76599200 -4.98554400 2.02364000  
H -3.14166000 -4.81664300 -0.03233700  
C -3.89014200 -2.92244400 3.28472800

|    |             |             |             |   |             |             |             |
|----|-------------|-------------|-------------|---|-------------|-------------|-------------|
| H  | -3.33851000 | -1.12540700 | 2.22131600  | C | 3.25734100  | 0.95561900  | -0.93333200 |
| C  | -4.03955700 | -4.31157800 | 3.21834100  | H | 2.23699600  | 1.36961400  | -0.97602500 |
| H  | -3.88104200 | -6.07121200 | 1.96702700  | H | 3.89229400  | 1.77501800  | -0.55687200 |
| H  | -4.09816400 | -2.39063500 | 4.21675500  | C | 3.71536000  | 0.64114300  | -2.34484700 |
| H  | -4.36618700 | -4.87011100 | 4.09960000  | O | 3.40420100  | 1.31548700  | -3.30127000 |
| C  | -4.29574000 | -1.47944200 | -1.36390000 | H | 4.38198800  | -0.24978700 | -2.45446900 |
| C  | -5.40883000 | -2.33624800 | -1.30802000 | S | 4.55334700  | -0.25021400 | 1.09378000  |
| C  | -4.38152500 | -0.28914900 | -2.10834600 | O | 4.73651800  | 1.10775600  | 1.63874300  |
| C  | -6.58268600 | -2.00750900 | -1.99127300 | O | 4.23380900  | -1.36289500 | 2.00065100  |
| H  | -5.36673500 | -3.26305100 | -0.73215600 | C | 6.05495100  | -0.66776900 | 0.21450200  |
| C  | -5.55787200 | 0.03457800  | -2.79220200 | C | 6.92208600  | 0.34644400  | -0.20109000 |
| H  | -3.52430800 | 0.38941500  | -2.15233500 | C | 6.33410300  | -2.01402400 | -0.05849800 |
| C  | -6.65972500 | -0.82382800 | -2.73401400 | C | 8.07474900  | 0.00376400  | -0.91282400 |
| H  | -7.44252700 | -2.68084600 | -1.94172000 | H | 6.70960800  | 1.39025400  | 0.03593400  |
| H  | -5.61188100 | 0.96220600  | -3.36791800 | C | 7.48880800  | -2.33389200 | -0.76868200 |
| H  | -7.58100800 | -0.56985800 | -3.26511800 | H | 5.66492400  | -2.80328900 | 0.28951800  |
| C  | -1.79747100 | -2.98751400 | -1.63391000 | C | 8.37685900  | -1.33437000 | -1.21166500 |
| C  | -2.10561400 | -3.04616800 | -3.00334800 | H | 8.75486800  | 0.79593100  | -1.23700900 |
| C  | -0.71840800 | -3.74508900 | -1.14058000 | H | 7.71133700  | -3.38370700 | -0.97964800 |
| C  | -1.35073600 | -3.85227200 | -3.86241500 | P | -1.06000900 | 2.55882300  | 0.15027100  |
| H  | -2.93720500 | -2.46680000 | -3.40931900 | C | -0.13840100 | 3.17770200  | 1.61664600  |
| C  | 0.02710100  | -4.55355500 | -2.00217100 | C | -0.66623800 | 4.15378500  | 2.47776300  |
| H  | -0.46278200 | -3.71513300 | -0.07924900 | C | 1.13518600  | 2.64209700  | 1.88456300  |
| C  | -0.28530900 | -4.60781700 | -3.36530800 | C | 0.07153600  | 4.58628600  | 3.58565700  |
| H  | -1.60363000 | -3.89093600 | -4.92527400 | H | -1.65108500 | 4.58543300  | 2.28937900  |
| H  | 0.85668900  | -5.14433300 | -1.60474700 | C | 1.87034400  | 3.08265300  | 2.98664000  |
| H  | 0.30050800  | -5.24021500 | -4.03768400 | H | 1.56011600  | 1.87690600  | 1.23342100  |
| Pd | -1.74738400 | 0.26511900  | 0.00612000  | C | 1.33876400  | 4.05476800  | 3.84178200  |
| C  | 0.73687800  | -1.41568800 | 1.83662500  | H | -0.34927500 | 5.34706300  | 4.24851000  |
| C  | 1.22394300  | -2.65290200 | 2.30905400  | H | 2.85930700  | 2.65651400  | 3.17275900  |
| C  | -0.00931600 | -0.62554300 | 2.73350200  | H | 1.91235200  | 4.39648800  | 4.70751200  |
| C  | 0.96926500  | -3.08179300 | 3.61427500  | C | -0.13613300 | 3.18430400  | -1.30794100 |
| H  | 1.80049800  | -3.30380200 | 1.64863500  | C | 0.74148700  | 4.27870300  | -1.22377000 |
| C  | -0.25582900 | -1.04850800 | 4.04265800  | C | -0.33256100 | 2.55212800  | -2.54883000 |
| H  | -0.39273300 | 0.34038700  | 2.40294800  | C | 1.41582200  | 4.72625700  | -2.36416500 |
| C  | 0.23130500  | -2.28017800 | 4.49109300  | H | 0.90445900  | 4.78508500  | -0.27011800 |
| H  | 1.35264200  | -4.05031100 | 3.94721000  | C | 0.34083800  | 3.00559200  | -3.68568300 |
| H  | -0.82875000 | -0.40639300 | 4.71761900  | H | -1.01146900 | 1.69849600  | -2.62424200 |
| H  | 0.03981100  | -2.61178300 | 5.51519700  | C | 1.22033500  | 4.08961800  | -3.59369700 |
| C  | 0.97820500  | -0.98848700 | 0.42663800  | H | 2.09920700  | 5.57618300  | -2.28843600 |
| C  | 0.08281300  | -0.35796600 | -0.35870200 | H | 0.18524600  | 2.50343500  | -4.64400100 |
| H  | 0.34039000  | -0.12092000 | -1.39958700 | H | 1.75588500  | 4.43681900  | -4.48123100 |
| C  | 2.34851300  | -1.27915000 | -0.19835900 | C | -2.67309300 | 3.43871900  | 0.15501300  |
| H  | 2.78782500  | -2.19096600 | 0.22084700  | C | -2.92949700 | 4.57461100  | -0.63041200 |
| H  | 2.23637400  | -1.44979900 | -1.27943100 | C | -3.69733700 | 2.91384600  | 0.96586900  |
| N  | 3.31553100  | -0.17559600 | -0.02326200 | C | -4.19034100 | 5.17856500  | -0.59641100 |

|               |             |             |             |    |             |             |             |
|---------------|-------------|-------------|-------------|----|-------------|-------------|-------------|
| H             | -2.14856800 | 4.99327400  | -1.26869300 | Pd | 1.38995700  | 0.24003800  | -0.11965100 |
| C             | -4.95435400 | 3.52339800  | 0.99871700  | C  | -1.87970600 | -0.64853900 | 2.62682100  |
| H             | -3.50871400 | 2.02703200  | 1.57942800  | C  | -2.94473700 | 0.09455700  | 3.17549200  |
| C             | -5.20225300 | 4.65647300  | 0.21628100  | C  | -1.44912400 | -1.79553500 | 3.32260600  |
| H             | -4.38143800 | 6.06370600  | -1.20888400 | C  | -3.54816200 | -0.29129700 | 4.37601500  |
| H             | -5.74175600 | 3.11003100  | 1.63430000  | H  | -3.29718300 | 0.99862100  | 2.67295200  |
| H             | -6.18641400 | 5.13195300  | 0.23814300  | C  | -2.05280300 | -2.18112700 | 4.52279500  |
| C             | 9.61990700  | -1.70594000 | -1.97516600 | H  | -0.64216000 | -2.40329000 | 2.90676400  |
| H             | 10.27741400 | -2.34973100 | -1.36647000 | C  | -3.10593700 | -1.43128400 | 5.05612500  |
| H             | 9.36849100  | -2.27784300 | -2.88416600 | H  | -4.36678500 | 0.30772800  | 4.78483300  |
| H             | 10.19346600 | -0.81691100 | -2.27506400 | H  | -1.70331300 | -3.08020200 | 5.03818100  |
| <b>int-10</b> |             |             |             | H  | -3.58151300 | -1.73432000 | 5.99283800  |
| P             | 2.15362500  | -2.03586200 | -0.25004500 | C  | -1.20438000 | -0.21630300 | 1.35875600  |
| C             | 1.16166600  | -3.31619400 | -1.11925500 | C  | 0.14314400  | -0.19071600 | 1.34275400  |
| C             | -0.11055100 | -3.64482900 | -0.61571200 | H  | 0.70872800  | -0.47746100 | 2.23852700  |
| C             | 1.63845400  | -3.97433300 | -2.26517300 | C  | -2.07877700 | 0.22931700  | 0.19019300  |
| C             | -0.88160900 | -4.62882400 | -1.23826100 | H  | -3.06208300 | 0.55223700  | 0.56103300  |
| H             | -0.50562400 | -3.13559800 | 0.26588200  | H  | -1.62981400 | 1.11246800  | -0.28107400 |
| C             | 0.85723400  | -4.95253300 | -2.88990200 | N  | -2.28379700 | -0.74779100 | -0.90058300 |
| H             | 2.62151700  | -3.73329900 | -2.67375600 | C  | -1.52152500 | -0.59445200 | -2.12909500 |
| C             | -0.39959900 | -5.28478100 | -2.37662400 | H  | -0.43996900 | -0.60664500 | -1.90738200 |
| H             | -1.86878400 | -4.86991700 | -0.83842200 | H  | -1.72384400 | -1.44816400 | -2.79592100 |
| H             | 1.23896900  | -5.45898900 | -3.78040400 | C  | -1.86051300 | 0.66067900  | -2.90431900 |
| H             | -1.00628100 | -6.05203100 | -2.86500600 | O  | -1.05460200 | 1.25717700  | -3.58554500 |
| C             | 3.71742900  | -1.88043600 | -1.20509400 | H  | -2.92110100 | 1.00480000  | -2.83038200 |
| C             | 4.86674400  | -2.63341700 | -0.91118700 | S  | -3.54275300 | -1.83924400 | -0.80024000 |
| C             | 3.75290400  | -0.95240000 | -2.26163500 | O  | -3.46810200 | -2.67970200 | -2.00911300 |
| C             | 6.02955500  | -2.46050800 | -1.66793900 | O  | -3.47813700 | -2.47787700 | 0.52541900  |
| H             | 4.85938200  | -3.35755500 | -0.09378200 | C  | -5.07426100 | -0.91671600 | -0.87042400 |
| C             | 4.91744200  | -0.78373500 | -3.01606900 | C  | -5.55096000 | -0.48694700 | -2.11723800 |
| H             | 2.86508400  | -0.35786800 | -2.50034200 | C  | -5.78001500 | -0.64517600 | 0.30400800  |
| C             | 6.05756800  | -1.53753700 | -2.71917600 | C  | -6.74273000 | 0.23087000  | -2.17327600 |
| H             | 6.91901000  | -3.05120900 | -1.43321900 | H  | -5.00536200 | -0.72238700 | -3.03330600 |
| H             | 4.93342500  | -0.05839100 | -3.83363300 | C  | -6.97364400 | 0.07832200  | 0.22564200  |
| H             | 6.97037000  | -1.40378200 | -3.30577800 | H  | -5.41074900 | -1.00233900 | 1.26638700  |
| C             | 2.63652800  | -2.79745800 | 1.35258600  | C  | -7.47332500 | 0.52929000  | -1.00585600 |
| C             | 2.50277100  | -4.17262900 | 1.60681000  | H  | -7.12044900 | 0.56308000  | -3.14433900 |
| C             | 3.19044900  | -1.96616900 | 2.34280400  | H  | -7.52823900 | 0.29042900  | 1.14360800  |
| C             | 2.91741800  | -4.70392200 | 2.83286600  | P  | 1.20111900  | 2.61056600  | 0.13162300  |
| H             | 2.07869200  | -4.83732000 | 0.85193700  | C  | -0.42772100 | 3.46452500  | 0.12987900  |
| C             | 3.60909300  | -2.50224500 | 3.56281700  | C  | -0.95875500 | 4.03732600  | -1.03819000 |
| H             | 3.29637300  | -0.89446100 | 2.15795200  | C  | -1.19282100 | 3.47703400  | 1.31161200  |
| C             | 3.47070000  | -3.87238500 | 3.81109700  | C  | -2.23060300 | 4.61957500  | -1.02046300 |
| H             | 2.80808600  | -5.77535900 | 3.02045000  | H  | -0.38684800 | 4.03464300  | -1.96792500 |
| H             | 4.03927900  | -1.84583600 | 4.32370600  | C  | -2.46038500 | 4.06450400  | 1.32315100  |
| H             | 3.79265900  | -4.29108800 | 4.76829200  | H  | -0.79943500 | 3.03419500  | 2.22934100  |



|               |             |             |             |   |             |             |             |
|---------------|-------------|-------------|-------------|---|-------------|-------------|-------------|
| C             | -2.98332000 | 4.63552700  | 0.15742700  | H | -4.25174600 | -2.56409700 | -0.31616400 |
| H             | -2.63040400 | 5.06679800  | -1.93433900 | H | -4.38592500 | -0.95366500 | 0.42102000  |
| H             | -3.04099600 | 4.07678800  | 2.24932600  | N | -2.74784000 | -1.25566500 | -0.92393600 |
| H             | -3.97542300 | 5.09448900  | 0.16881400  | C | -1.63654700 | -0.43450300 | -0.44318200 |
| C             | 2.06823300  | 3.22651000  | 1.62960300  | H | -1.07135900 | -0.04399300 | -1.29731900 |
| C             | 1.86573300  | 4.52518600  | 2.13069900  | H | -1.99854300 | 0.41698800  | 0.16239900  |
| C             | 2.99582800  | 2.38281600  | 2.26370100  | C | -0.73656500 | -1.32721200 | 0.42253900  |
| C             | 2.57990400  | 4.96534100  | 3.24864900  | O | 0.23978600  | -0.59716900 | 1.11996600  |
| H             | 1.15189700  | 5.19879600  | 1.65187700  | H | -0.27010300 | -2.08811800 | -0.23782900 |
| C             | 3.71101200  | 2.82855700  | 3.37912200  | S | -3.39412600 | -0.94455200 | -2.43488400 |
| H             | 3.15505200  | 1.37071200  | 1.88242300  | O | -2.25600200 | -0.64328700 | -3.32157500 |
| C             | 3.50218300  | 4.11935700  | 3.87433900  | O | -4.27621500 | -2.08016100 | -2.74757700 |
| H             | 2.41441500  | 5.97584800  | 3.63144600  | C | -4.40881600 | 0.52574200  | -2.33592100 |
| H             | 4.42884500  | 2.16222000  | 3.86441800  | C | -3.82156400 | 1.78338300  | -2.51249300 |
| H             | 4.05666300  | 4.46662200  | 4.75026200  | C | -5.77616500 | 0.40177100  | -2.05647800 |
| C             | 2.14659900  | 3.26731200  | -1.30594400 | C | -4.61679900 | 2.92541200  | -2.39868200 |
| C             | 3.06701500  | 4.32349700  | -1.19095400 | H | -2.76006900 | 1.87491200  | -2.74867600 |
| C             | 1.95797500  | 2.65223200  | -2.55789000 | C | -6.55234300 | 1.55471700  | -1.94763200 |
| C             | 3.77603800  | 4.76174100  | -2.31304500 | H | -6.22993200 | -0.58381700 | -1.93899600 |
| H             | 3.23668600  | 4.80890500  | -0.22811600 | C | -5.98983700 | 2.83381600  | -2.11440800 |
| C             | 2.66554900  | 3.09950500  | -3.67798400 | H | -4.15926900 | 3.90821200  | -2.54014200 |
| H             | 1.24599200  | 1.83059500  | -2.66662700 | H | -7.62055800 | 1.45932000  | -1.73345500 |
| C             | 3.57684000  | 4.15316700  | -3.55691800 | P | 1.03355400  | 2.42859700  | 0.95317300  |
| H             | 4.48895700  | 5.58438700  | -2.21247400 | P | 2.67609200  | -1.71020300 | -0.74213600 |
| H             | 2.50395400  | 2.61916400  | -4.64655000 | C | 2.31326800  | -2.24663600 | -2.45872700 |
| H             | 4.13428100  | 4.49901800  | -4.43147500 | C | 1.03174700  | -2.04225200 | -2.99660500 |
| C             | -8.76019900 | 1.30519300  | -1.09296600 | C | 3.30103300  | -2.86785000 | -3.24520300 |
| H             | -8.59546600 | 2.29022300  | -1.56133500 | C | 0.73813700  | -2.45954900 | -4.29815400 |
| H             | -9.49735100 | 0.77504900  | -1.71956300 | H | 0.25454100  | -1.55738000 | -2.40577900 |
| H             | -9.20601200 | 1.46600000  | -0.10069800 | C | 3.00218000  | -3.28251400 | -4.54561500 |
| <b>int-11</b> |             |             |             | H | 4.30459100  | -3.03106400 | -2.84573100 |
| C             | -3.71738100 | -2.88179100 | 2.40238700  | C | 1.72199600  | -3.07976900 | -5.07381700 |
| C             | -4.86458700 | -3.64378000 | 2.10176800  | H | -0.26412400 | -2.29152100 | -4.69994500 |
| C             | -3.35074900 | -2.75325000 | 3.75895700  | H | 3.77509300  | -3.76563200 | -5.14916200 |
| C             | -5.60064700 | -4.26836100 | 3.11318300  | H | 1.49341300  | -3.40320100 | -6.09284700 |
| H             | -5.18445400 | -3.77358900 | 1.06604300  | C | 4.43613700  | -1.18890400 | -0.76278200 |
| C             | -4.08529800 | -3.37790400 | 4.76794600  | C | 5.44934000  | -1.84834000 | -0.04809900 |
| H             | -2.48959400 | -2.13704400 | 4.02705600  | C | 4.74932500  | -0.02781600 | -1.49903900 |
| C             | -5.21476200 | -4.14131600 | 4.45049500  | C | 6.75795300  | -1.35579600 | -0.07644900 |
| H             | -6.48150500 | -4.86050400 | 2.85006100  | H | 5.22539700  | -2.74878700 | 0.52715000  |
| H             | -3.78017300 | -3.25755600 | 5.81116700  | C | 6.05876300  | 0.45855000  | -1.52156500 |
| H             | -5.79306600 | -4.62710600 | 5.24102500  | H | 3.97152100  | 0.49032700  | -2.06849800 |
| C             | -2.91345000 | -2.22083100 | 1.33672500  | C | 7.06468600  | -0.20460500 | -0.80949300 |
| C             | -1.58122200 | -2.04636100 | 1.44922300  | H | 7.54276100  | -1.87909000 | 0.47603500  |
| H             | -1.03954800 | -2.44669100 | 2.31063200  | H | 6.29373600  | 1.35670600  | -2.09851300 |
| C             | -3.66633800 | -1.73984500 | 0.11277400  | H | 8.08958200  | 0.17513500  | -0.82832100 |

|    |             |             |             |               |             |             |             |
|----|-------------|-------------|-------------|---------------|-------------|-------------|-------------|
| C  | 2.53774000  | -3.17514400 | 0.34351600  | H             | -7.56530500 | 4.11531300  | -2.84657500 |
| C  | 2.32186400  | -4.46809000 | -0.16176600 | H             | -7.44635700 | 4.05395500  | -1.08077800 |
| C  | 2.62088700  | -2.97981700 | 1.73545200  | H             | -6.24634500 | 4.98415500  | -2.02200100 |
| C  | 2.20111200  | -5.55100500 | 0.71492500  | <b>int-12</b> |             |             |             |
| H  | 2.24684900  | -4.63729100 | -1.23767000 | P             | -2.38496300 | 0.00783200  | 0.02509400  |
| C  | 2.50670000  | -4.06702600 | 2.60445700  | P             | 2.38504200  | 0.00772300  | -0.02512800 |
| H  | 2.77749400  | -1.97737500 | 2.14180300  | C             | 3.35105000  | 1.52826200  | -0.49380900 |
| C  | 2.29471300  | -5.35368900 | 2.09580800  | C             | 3.37509700  | 2.59705900  | 0.42308300  |
| H  | 2.03328200  | -6.55367600 | 0.31322700  | C             | 4.03925100  | 1.67172900  | -1.70895400 |
| H  | 2.57777100  | -3.90707700 | 3.68343200  | C             | 4.06287800  | 3.77570600  | 0.12871300  |
| H  | 2.19918600  | -6.20256800 | 2.77806900  | H             | 2.85510800  | 2.51220400  | 1.37928000  |
| C  | -0.35125800 | 2.47030100  | 2.14564700  | C             | 4.72779500  | 2.85571400  | -2.00244400 |
| C  | -0.19269100 | 1.81409200  | 3.38125700  | H             | 4.05886100  | 0.86168500  | -2.43832600 |
| C  | -1.58322300 | 3.06855200  | 1.83489700  | C             | 4.74049100  | 3.91140800  | -1.08861800 |
| C  | -1.24579000 | 1.77860500  | 4.29728600  | H             | 4.06904300  | 4.59239400  | 0.85566300  |
| H  | 0.75639400  | 1.33300800  | 3.63232100  | H             | 5.26040800  | 2.94456500  | -2.95327800 |
| C  | -2.63599300 | 3.02478000  | 2.75544900  | H             | 5.27902600  | 4.83450600  | -1.31954900 |
| H  | -1.72815700 | 3.57325900  | 0.87765300  | C             | 3.03507300  | -1.30174500 | -1.15357500 |
| C  | -2.46950700 | 2.38346700  | 3.98619900  | C             | 3.79433900  | -2.39787500 | -0.71516900 |
| H  | -1.11080900 | 1.27340200  | 5.25721900  | C             | 2.67489900  | -1.22771800 | -2.51323800 |
| H  | -3.58952300 | 3.49801100  | 2.50680800  | C             | 4.20481800  | -3.38339900 | -1.62083400 |
| H  | -3.29354900 | 2.35271300  | 4.70396500  | H             | 4.06465000  | -2.50160400 | 0.33643200  |
| C  | 0.61328500  | 3.56098800  | -0.42966200 | C             | 3.09943800  | -2.20416200 | -3.41733200 |
| C  | 0.63539200  | 4.95913400  | -0.27878500 | H             | 2.04937000  | -0.40567700 | -2.87140000 |
| C  | 0.28317300  | 3.00497500  | -1.67756300 | C             | 3.86794400  | -3.28601900 | -2.97326700 |
| C  | 0.31993500  | 5.78411100  | -1.36089100 | H             | 4.79277700  | -4.23208500 | -1.26090400 |
| H  | 0.89959000  | 5.40780400  | 0.68176300  | H             | 2.81819000  | -2.12462600 | -4.47086000 |
| C  | -0.02841900 | 3.83598400  | -2.75928400 | H             | 4.19453100  | -4.05493600 | -3.67854600 |
| H  | 0.27612000  | 1.91842800  | -1.80276000 | C             | 3.08190800  | -0.32095800 | 1.65240800  |
| C  | -0.01188400 | 5.22489300  | -2.60103900 | C             | 4.47008700  | -0.41818000 | 1.86715000  |
| H  | 0.33682000  | 6.86994800  | -1.23576100 | C             | 2.21600800  | -0.39315900 | 2.75452300  |
| H  | -0.27839600 | 3.39501700  | -3.72769600 | C             | 4.97306400  | -0.61244900 | 3.15541800  |
| H  | -0.25260100 | 5.87479800  | -3.44657600 | H             | 5.16503700  | -0.33416800 | 1.02822500  |
| C  | 2.47743700  | 3.18512000  | 1.79835700  | C             | 2.72265100  | -0.58018900 | 4.04603600  |
| C  | 2.35434800  | 4.07955100  | 2.87495300  | H             | 1.13980900  | -0.28615100 | 2.60020900  |
| C  | 3.75689400  | 2.85485200  | 1.31610600  | C             | 4.10017300  | -0.69651900 | 4.24730500  |
| C  | 3.49870000  | 4.63641800  | 3.45489000  | H             | 6.05269200  | -0.69151400 | 3.30892100  |
| H  | 1.36958400  | 4.34406200  | 3.26581700  | H             | 2.03597000  | -0.63087300 | 4.89518600  |
| C  | 4.89653100  | 3.41552000  | 1.89809300  | H             | 4.49717500  | -0.84375600 | 5.25539500  |
| H  | 3.86276000  | 2.15397300  | 0.48191400  | C             | -3.03505400 | -1.30160000 | 1.15354800  |
| C  | 4.76830700  | 4.30679700  | 2.96904800  | C             | -3.79426900 | -2.39775100 | 0.71510900  |
| H  | 3.39541700  | 5.33219100  | 4.29176500  | C             | -2.67500200 | -1.22752400 | 2.51323500  |
| H  | 5.88605900  | 3.15076700  | 1.51667000  | C             | -4.20481300 | -3.38325300 | 1.62077000  |
| H  | 5.65965100  | 4.74319800  | 3.42758600  | H             | -4.06448200 | -2.50153200 | -0.33651200 |
| Pd | 1.68345500  | 0.29374400  | 0.07812500  | C             | -3.09958800 | -2.20395100 | 3.41732300  |
| C  | -6.84972700 | 4.06484800  | -2.00758800 | H             | -2.04951500 | -0.40545000 | 2.87139600  |

|    |             |             |             |
|----|-------------|-------------|-------------|
| C  | -3.86804600 | -3.28583100 | 2.97322700  |
| H  | -4.79273200 | -4.23195800 | 1.26081900  |
| H  | -2.81842600 | -2.12438400 | 4.47087100  |
| H  | -4.19468000 | -4.05472700 | 3.67850600  |
| C  | -3.35094000 | 1.52838500  | 0.49382800  |
| C  | -4.03973300 | 1.67160600  | 1.70866500  |
| C  | -3.37443100 | 2.59742900  | -0.42279600 |
| C  | -4.72834700 | 2.85556700  | 2.00210100  |
| H  | -4.05973900 | 0.86139700  | 2.43784300  |
| C  | -4.06229200 | 3.77604200  | -0.12849000 |
| H  | -2.85390300 | 2.51279800  | -1.37871300 |
| C  | -4.74052000 | 3.91148400  | 1.08852900  |
| H  | -5.26142300 | 2.94421500  | 2.95269600  |
| H  | -4.06802200 | 4.59291800  | -0.85523300 |
| H  | -5.27910700 | 4.83456200  | 1.31942200  |
| C  | -3.08199100 | -0.32081700 | -1.65240000 |
| C  | -4.47019100 | -0.41796000 | -1.86702600 |
| C  | -2.21618900 | -0.39307700 | -2.75459000 |
| C  | -4.97328800 | -0.61221800 | -3.15524800 |
| H  | -5.16505800 | -0.33393200 | -1.02803400 |
| C  | -2.72294900 | -0.58011000 | -4.04605600 |
| H  | -1.13997600 | -0.28608500 | -2.60037500 |
| C  | -4.10049600 | -0.69636200 | -4.24720800 |
| H  | -6.05293500 | -0.69121300 | -3.30866000 |
| H  | -2.03634200 | -0.63085500 | -4.89526200 |
| H  | -4.49759200 | -0.84359400 | -5.25526200 |
| Pd | 0.00000700  | 0.06304700  | -0.00004900 |
| C  | -0.00007400 | -2.06862200 | 0.00008700  |
| C  | -0.09487400 | -2.82292400 | -1.19032500 |
| C  | 0.09472700  | -2.82302100 | 1.19042800  |
| C  | -0.09931000 | -4.22566700 | -1.19921700 |
| H  | -0.16384700 | -2.31364800 | -2.15586700 |
| C  | 0.09918500  | -4.22576600 | 1.19920100  |
| H  | 0.16368600  | -2.31382500 | 2.15601700  |
| C  | -0.00005500 | -4.93903200 | -0.00003600 |
| H  | -0.17891800 | -4.76248100 | -2.15057600 |
| H  | 0.17879400  | -4.76265700 | 2.15051600  |
| H  | -0.00003600 | -6.03322300 | -0.00008200 |
| C  | 0.14068400  | 2.90459600  | -1.19016300 |
| C  | 0.00020800  | 2.15891000  | -0.00009700 |
| C  | -0.14021800 | 2.90436700  | 1.19012900  |
| C  | -0.13785900 | 4.30675700  | 1.19784900  |
| C  | 0.00022500  | 5.01793400  | 0.00019700  |
| C  | 0.13834300  | 4.30699000  | -1.19758800 |
| H  | 0.26027500  | 2.38623600  | -2.14870000 |
| H  | -0.25972900 | 2.38581900  | 2.14857500  |

|   |             |            |             |
|---|-------------|------------|-------------|
| H | -0.24705600 | 4.84658700 | 2.14451400  |
| H | 0.00019800  | 6.11204500 | 0.00029400  |
| H | 0.24757700  | 4.84701200 | -2.14414000 |

**pro-side**

|   |             |             |             |
|---|-------------|-------------|-------------|
| C | 2.84502700  | -0.15396700 | 1.94781700  |
| C | 3.65321200  | -0.80393000 | 1.10294300  |
| C | 1.56279000  | 0.50531000  | 1.52731200  |
| H | 0.70843900  | -0.01571000 | 2.00873700  |
| H | 1.54594000  | 1.54504500  | 1.88633300  |
| N | 1.44141600  | 0.51175700  | 0.06225800  |
| C | 1.84373300  | -0.72435000 | -0.61199400 |
| H | 1.28116500  | -1.59777300 | -0.22990500 |
| H | 1.65779200  | -0.63047700 | -1.68833700 |
| C | 3.33369700  | -0.96702400 | -0.36285200 |
| O | 3.60478700  | -2.28536400 | -0.82288000 |
| H | 3.91676600  | -0.23083100 | -0.95138700 |
| S | 0.17898700  | 1.39393400  | -0.59503800 |
| O | 0.13745200  | 2.66267000  | 0.14917800  |
| O | 0.39382300  | 1.41126800  | -2.05048500 |
| C | -1.35012700 | 0.52118200  | -0.27443400 |
| C | -2.07952800 | 0.81085800  | 0.88339600  |
| C | -1.78830100 | -0.45857100 | -1.17600600 |
| C | -3.25508700 | 0.10150800  | 1.14076900  |
| H | -1.74424800 | 1.59135600  | 1.56857000  |
| C | -2.96326300 | -1.15510100 | -0.89999900 |
| H | -1.22725100 | -0.66360700 | -2.08954300 |
| C | -3.71509900 | -0.89174200 | 0.26077100  |
| H | -3.82866300 | 0.33112900  | 2.04276200  |
| H | -3.30990900 | -1.91622600 | -1.60474500 |
| H | 4.59019500  | -1.24826300 | 1.45770400  |
| C | -4.97945200 | -1.66023300 | 0.53891200  |
| H | -4.76542300 | -2.73534500 | 0.66512700  |
| H | -5.48024900 | -1.30248300 | 1.45018700  |
| H | -5.68799600 | -1.57396900 | -0.30176500 |
| H | 4.56418300  | -2.41989000 | -0.80669500 |
| H | 3.09144300  | -0.07044800 | 3.01145100  |

**int-Au(I)**

|    |             |             |             |
|----|-------------|-------------|-------------|
| C  | 2.86239700  | -0.61977900 | 0.00180500  |
| C  | 2.86497300  | 0.60839800  | -0.00047300 |
| H  | 3.03691300  | 1.67717500  | -0.00219800 |
| Au | 0.64317300  | 0.00086600  | -0.00065000 |
| H  | 3.02849900  | -1.68944000 | 0.00397600  |
| P  | -1.68532700 | -0.00217700 | -0.00062400 |
| C  | -2.38697200 | 1.67749800  | 0.14216500  |
| H  | -2.04524200 | 2.13976000  | 1.08042100  |
| H  | -2.04643800 | 2.29123100  | -0.70535600 |

H -3.48731000 1.62166000 0.13797800  
C -2.40385000 -0.71552800 -1.51940000  
H -2.06612400 -0.13596600 -2.39178200  
H -2.06782600 -1.75761700 -1.62964000  
H -3.50367900 -0.68743700 -1.46132200  
C -2.39734300 -0.95745100 1.38250900  
H -2.06281600 -2.00374600 1.31660100  
H -2.05460500 -0.53099100 2.33725500  
H -3.49738900 -0.91922100 1.33510900

**int-Pd(II)**

Pd -0.18847400 0.31709700 -0.15261400  
C 0.70174400 2.08941500 0.74653100  
C 0.54296600 2.34429900 -0.45210800  
H 0.49645400 2.76109300 -1.45045500  
H 0.92459700 2.07080200 1.80580800  
C 2.43665800 -0.76997100 0.20584100  
O 2.20581500 -0.73815100 1.41352100  
O 1.60413800 -0.36269100 -0.71632300  
C -2.46779000 -0.62539200 0.03260700  
O -1.49247000 -1.37490900 -0.29885200  
O -2.20095900 0.61014800 0.24470700  
C 3.74597200 -1.28206000 -0.35822200  
H 3.56047900 -2.01048100 -1.16223500  
H 4.30585200 -0.44055400 -0.79821800  
H 4.34626700 -1.74257900 0.43760200  
C -3.84867400 -1.15723000 0.20136500  
H -3.94326600 -1.55775100 1.22524400  
H -4.59022600 -0.35760100 0.06840500  
H -4.02779900 -1.97896700 -0.50640400

**int-Pd(0)**

P -1.85499400 -0.62284600 0.00402100  
P 1.85473900 -0.62319500 -0.00408900  
Pd 0.00002700 0.86896300 -0.00007400  
C 0.64311500 2.83976100 -0.01691800  
C -0.64174000 2.84028400 0.01691800  
H -1.53638300 3.46296100 0.03960800  
H 1.53839000 3.46152000 -0.03959000  
C 3.47034000 0.11063500 -0.51566600  
H 4.28923700 -0.62646700 -0.46685100  
H 3.38795800 0.48941600 -1.54688600  
H 3.70920900 0.95992200 0.14373100  
C 2.27992000 -1.35342600 1.63792800  
H 1.42237200 -1.92902400 2.01998300  
H 3.15861900 -2.01635900 1.57118700  
H 2.49426900 -0.54244600 2.35194000  
C -2.27974300 -1.35435900 -1.63753000

H -3.15821000 -2.01755900 -1.57041500  
H -2.49429600 -0.54397500 -2.35215800  
H -1.42193600 -1.92991500 -2.01905800  
C -3.47062900 0.11163600 0.51454800  
H -3.70880800 0.96093900 -0.14507100  
H -4.28979900 -0.62514300 0.46540000  
H -3.38862700 0.49050900 1.54576600  
C -1.77895900 -2.12205500 1.08001700  
H -0.93761900 -2.76019300 0.76846600  
H -1.61483800 -1.81608600 2.12539700  
H -2.71164700 -2.70737900 1.02059500  
C 1.77820700 -2.12324900 -1.07885900  
H 1.61459000 -1.81803000 -2.12453700  
H 2.71058200 -2.70900200 -1.01869500  
H 0.93646400 -2.76071800 -0.76704300

**int-oxcyc**

P -1.64282400 -1.89047900 -0.02137800  
P -2.21547700 1.74323500 0.19166200  
C -3.56483100 1.44693100 -1.03357400  
C -3.17760800 1.22646300 -2.36912900  
C -4.93149600 1.44517600 -0.71277000  
C -4.13845600 1.03633900 -3.36572300  
H -2.11675200 1.20754400 -2.63221500  
C -5.89043300 1.24397300 -1.71199500  
H -5.26247000 1.59118300 0.31588600  
C -5.49860400 1.04618400 -3.03909400  
H -3.82134900 0.87413200 -4.39928600  
H -6.95079900 1.24093000 -1.44618800  
H -6.25132600 0.89248900 -3.81697300  
C -2.93658400 1.67083300 1.88744900  
C -3.93162300 2.57626000 2.30401900  
C -2.42869700 0.74412000 2.81158600  
C -4.42656100 2.52887200 3.60930600  
H -4.31605700 3.33120100 1.61458500  
C -2.91973400 0.70551700 4.12166000  
H -1.63649100 0.05608700 2.50861400  
C -3.92316500 1.59237900 4.52022400  
H -5.20309400 3.23330100 3.91907700  
H -2.51091000 -0.01880400 4.83103600  
H -4.30738600 1.56273500 5.54340500  
C -1.86510400 3.55661400 0.02793900  
C -2.20781300 4.29270800 -1.11676400  
C -1.18994900 4.20744800 1.07777300  
C -1.88880400 5.65303600 -1.20632600  
H -2.73108700 3.81634800 -1.94744400  
C -0.87502400 5.56514700 0.98588900

H -0.90594600 3.65362600 1.97636400  
C -1.22431400 6.29317700 -0.15735500  
H -2.16789400 6.21259000 -2.10324000  
H -0.35346000 6.05579000 1.81209300  
H -0.97874000 7.35615600 -0.22851500  
C -1.08127500 -2.88520300 -1.47905500  
C -0.87263400 -4.27294100 -1.42519600  
C -0.86280400 -2.21064900 -2.69359400  
C -0.45974700 -4.97111200 -2.56494700  
H -1.02523500 -4.82059100 -0.49334600  
C -0.45800700 -2.91167300 -3.83336500  
H -1.00467500 -1.12836000 -2.74668900  
C -0.25391700 -4.29404400 -3.77107700  
H -0.29656000 -6.05071600 -2.50654500  
H -0.29433100 -2.37327100 -4.77077800  
H 0.06991800 -4.84207100 -4.66009400  
C -3.48395000 -2.09495700 -0.05928600  
C -4.16347300 -2.44160700 -1.23947000  
C -4.23495600 -1.86064900 1.10816300  
C -5.55769000 -2.56302700 -1.24777500  
H -3.61012600 -2.62714100 -2.16176800  
C -5.62628600 -1.98821600 1.09778000  
H -3.73452000 -1.59035400 2.03975000  
C -6.29324700 -2.34122000 -0.08043000  
H -6.06782200 -2.83861200 -2.17473900  
H -6.19042000 -1.81172900 2.01767400  
H -7.38175100 -2.44340200 -0.08735400  
C -1.13980700 -2.87469400 1.46224100  
C -1.85339400 -4.00565800 1.90102000  
C 0.00620500 -2.47661200 2.17310900  
C -1.42571500 -4.72145500 3.02315900  
H -2.75089400 -4.33268600 1.37205500  
C 0.43184700 -3.19600100 3.29472000  
H 0.57189300 -1.60470600 1.83815800  
C -0.28308500 -4.31846800 3.72288800  
H -1.99027300 -5.59823500 3.35192900  
H 1.32479000 -2.87320900 3.83685100  
H 0.04716400 -4.87816000 4.60225200  
Pd -0.45049100 0.29496500 -0.14271600  
C 2.07410000 1.38152000 -0.77524800  
C 0.86784400 1.81466700 -0.36914900  
C 3.39342700 2.09650100 -0.92943800  
H 3.55674500 2.43899500 -1.96536300  
H 3.49552700 2.97117200 -0.26851400  
N 4.37434800 1.02548000 -0.55866000  
C 3.68414700 -0.26247000 -0.28815900

H 4.25974700 -1.11171000 -0.68178400  
H 3.55345000 -0.39807700 0.79931400  
C 2.30205500 -0.08985200 -0.96013000  
O 1.26361800 -0.85794400 -0.43873300  
H 2.45198500 -0.29406700 -2.04854700  
S 5.80975300 0.98303600 -1.40401700  
O 5.75370100 0.04401100 -2.54541700  
O 6.14774100 2.39014600 -1.69537400  
C 6.98530300 0.33213200 -0.22666700  
C 7.60897500 -0.89416500 -0.47469800  
C 7.30518300 1.09195800 0.90375900  
C 8.55727000 -1.36636700 0.43320300  
H 7.35655400 -1.46773200 -1.36798900  
C 8.25556200 0.60260000 1.79953800  
H 6.82202900 2.05467100 1.08430500  
C 8.89556900 -0.63131500 1.58311400  
H 9.04676700 -2.32557400 0.24237000  
H 8.50902800 1.19274400 2.68426500  
H 0.69613600 2.87548800 -0.15297400  
C 9.91205200 -1.16432800 2.55763700  
H 10.16811800 -0.42009800 3.32573300  
H 9.52762900 -2.06290300 3.07069200  
H 10.83847300 -1.46454000 2.04110600

**int-LA**

P -2.23835200 -1.72682600 -0.02783100  
P -1.27034300 1.87004500 0.16039600  
C -2.99543000 2.35449500 -0.25241800  
C -3.50591100 1.93579200 -1.49405300  
C -3.79313300 3.15248600 0.58365100  
C -4.78641200 2.32193100 -1.89875600  
H -2.89778400 1.30622900 -2.14931200  
C -5.07673300 3.53093900 0.17761400  
H -3.42417500 3.48204800 1.55626800  
C -5.57427800 3.12060600 -1.06309100  
H -5.17049800 1.99272300 -2.86777000  
H -5.69011400 4.14995000 0.83770100  
H -6.57811900 3.41898200 -1.37706800  
C -1.02267900 2.09955100 1.96944500  
C -0.97277800 3.38475900 2.54153500  
C -0.83955900 0.97596800 2.79259300  
C -0.76842900 3.53603100 3.91523600  
H -1.08399200 4.27327700 1.91594900  
C -0.63186200 1.13238300 4.16732100  
H -0.84659000 -0.02573300 2.35771800  
C -0.60017600 2.41098700 4.73066900  
H -0.73369800 4.53889300 4.34900200

|   |             |             |             |                 |             |             |             |
|---|-------------|-------------|-------------|-----------------|-------------|-------------|-------------|
| H | -0.48764300 | 0.24975200  | 4.79575200  | Pd              | -0.55262200 | -0.18964400 | -0.66256000 |
| H | -0.43459800 | 2.53328300  | 5.80442600  | C               | 3.11038700  | 0.13610700  | -3.64250100 |
| C | -0.23534300 | 3.21543400  | -0.57781900 | C               | 1.88742800  | -0.26492200 | -3.23687100 |
| C | -0.76729700 | 4.21251300  | -1.41019900 | H               | 1.04137800  | -0.43631100 | -3.92378900 |
| C | 1.14704600  | 3.20957600  | -0.31363300 | C               | 4.15315600  | 0.44441500  | -2.60779400 |
| C | 0.07120600  | 5.18598600  | -1.96801600 | H               | 4.99257300  | -0.27581600 | -2.70844500 |
| H | -1.83584700 | 4.24106500  | -1.63003000 | H               | 4.57837800  | 1.44452600  | -2.78523300 |
| C | 1.97871700  | 4.18132200  | -0.87183300 | N               | 3.64568500  | 0.43206700  | -1.19819900 |
| H | 1.58710400  | 2.44243200  | 0.32795800  | C               | 2.77034400  | -0.69715400 | -0.89834000 |
| C | 1.44256400  | 5.17314100  | -1.70252300 | H               | 3.26497200  | -1.66554600 | -1.10960200 |
| H | -0.35644000 | 5.95698700  | -2.61461100 | H               | 2.47488100  | -0.68012800 | 0.15703700  |
| H | 3.05136300  | 4.14797500  | -0.66567000 | C               | 1.52846400  | -0.60411400 | -1.79663900 |
| H | 2.09502800  | 5.93169800  | -2.14315000 | O               | 0.63550500  | -1.60410000 | -1.60014400 |
| C | -2.45472000 | -2.89456700 | -1.43563600 | H               | 0.97026300  | 0.43550000  | -1.43549800 |
| C | -2.65302800 | -4.27064700 | -1.23372400 | S               | 4.57965900  | 1.06195900  | 0.02568200  |
| C | -2.43434000 | -2.38694000 | -2.74676400 | O               | 5.16563700  | 2.31104300  | -0.49802700 |
| C | -2.83408900 | -5.12219200 | -2.32800300 | O               | 3.73507800  | 1.12269400  | 1.23769000  |
| H | -2.66830000 | -4.68548700 | -0.22382600 | C               | 5.93367000  | -0.05754700 | 0.37543900  |
| C | -2.62262300 | -3.24096500 | -3.83682800 | C               | 7.13468400  | 0.07223700  | -0.32989600 |
| H | -2.26517200 | -1.32063100 | -2.91780400 | C               | 5.76340200  | -1.07569800 | 1.32336800  |
| C | -2.82127700 | -4.61007200 | -3.62932600 | C               | 8.16931600  | -0.83333700 | -0.08343800 |
| H | -2.98508700 | -6.19186100 | -2.15995400 | H               | 7.26831900  | 0.87914600  | -1.05250400 |
| H | -2.60570400 | -2.83521600 | -4.85171400 | C               | 6.80800900  | -1.96912100 | 1.55438500  |
| H | -2.96086400 | -5.27907700 | -4.48271600 | H               | 4.83158500  | -1.15925900 | 1.88541000  |
| C | -3.94559100 | -1.21409500 | 0.42548700  | C               | 8.02623100  | -1.86701900 | 0.85663000  |
| C | -5.05106400 | -1.54421700 | -0.37652100 | H               | 9.10999300  | -0.72875900 | -0.63076800 |
| C | -4.15077900 | -0.46701400 | 1.60027200  | H               | 6.67812300  | -2.76036800 | 2.29833700  |
| C | -6.33802700 | -1.14245300 | -0.00335600 | C               | 9.14262300  | -2.84073100 | 1.12659900  |
| H | -4.91790600 | -2.12012800 | -1.29371800 | H               | 10.01801500 | -2.64116800 | 0.49157200  |
| C | -5.43846400 | -0.07574400 | 1.97213200  | H               | 9.46429800  | -2.78893700 | 2.18067700  |
| H | -3.30589300 | -0.19635600 | 2.23639600  | H               | 8.81447400  | -3.87808000 | 0.94513700  |
| C | -6.53588600 | -0.41176400 | 1.17110100  |                 |             |             |             |
| H | -7.18925300 | -1.40866400 | -0.63555300 | <b>int-1-L2</b> |             |             |             |
| H | -5.58412900 | 0.49719900  | 2.89158000  | P               | 1.55850300  | 2.10861100  | -0.06588500 |
| H | -7.54318800 | -0.10285500 | 1.46283600  | P               | 1.71867600  | -1.89044900 | 0.17503000  |
| C | -1.65761400 | -2.76358600 | 1.38128600  | C               | 3.57757200  | -1.77798000 | 0.07799600  |
| C | -2.54216100 | -3.33049100 | 2.31504800  | C               | 4.22117800  | -0.72802000 | 0.75795000  |
| C | -0.27886600 | -3.01832200 | 1.49853200  | C               | 4.37195100  | -2.70175600 | -0.62460500 |
| C | -2.05194000 | -4.13144000 | 3.35180600  | C               | 5.61505400  | -0.61538800 | 0.75446500  |
| H | -3.61664000 | -3.15449000 | 2.23923600  | H               | 3.62834600  | 0.01599500  | 1.29326500  |
| C | 0.20435000  | -3.82321400 | 2.53324300  | C               | 5.76611700  | -2.58307900 | -0.63784100 |
| H | 0.41560500  | -2.59139200 | 0.77142200  | H               | 3.90905500  | -3.52477600 | -1.17161800 |
| C | -0.68035300 | -4.37788300 | 3.46454500  | C               | 6.39327000  | -1.54282100 | 0.05442000  |
| H | -2.74948900 | -4.56523800 | 4.07323300  | H               | 6.09225300  | 0.20737900  | 1.29371700  |
| H | 1.27779800  | -4.01396500 | 2.61315000  | H               | 6.36350000  | -3.31111600 | -1.19397500 |
| H | -0.30060800 | -5.00219200 | 4.27779000  | H               | 7.48287500  | -1.45167100 | 0.04378800  |
|   |             |             |             | C               | 3.11118600  | 2.02452200  | -1.09055700 |

|    |             |             |             |   |             |             |             |
|----|-------------|-------------|-------------|---|-------------|-------------|-------------|
| C  | 4.27304300  | 2.77191000  | -0.83142600 | H | -0.50759900 | 2.41011400  | -2.25741400 |
| C  | 3.10468100  | 1.16603700  | -2.20578500 | H | 1.05345800  | 2.90083200  | -2.92874700 |
| C  | 5.39123800  | 2.66764600  | -1.66647900 | C | -1.12688000 | 5.34908700  | -0.71168300 |
| H  | 4.32327900  | 3.43819300  | 0.03099600  | H | -1.20456500 | 3.35375100  | 0.12738900  |
| C  | 4.21754900  | 1.07019200  | -3.04698200 | H | -0.09417000 | 4.44113800  | 0.96518000  |
| H  | 2.22147300  | 0.55686400  | -2.41454700 | C | -1.60433600 | 5.01355800  | -2.12839200 |
| C  | 5.36700800  | 1.82010300  | -2.77832400 | H | -0.82801400 | 4.15990500  | -3.97628000 |
| H  | 6.28719200  | 3.25351000  | -1.44250600 | H | 0.29437900  | 5.24477500  | -3.14271300 |
| H  | 4.18805300  | 0.39829600  | -3.90921100 | H | -1.97141200 | 5.69830400  | -0.09276800 |
| H  | 6.24182700  | 1.74037200  | -3.42946100 | H | -0.40727600 | 6.18751000  | -0.75908800 |
| Pd | 0.27696200  | 0.05956200  | 0.04447900  | H | -2.03761300 | 5.90756000  | -2.60935700 |
| C  | -1.68142200 | -0.68868900 | -0.11524000 | H | -2.41575800 | 4.26409400  | -2.07147800 |
| C  | -1.72971200 | 0.58989700  | -0.09665100 | C | 1.51993400  | -2.96177300 | 1.72313200  |
| C  | -2.41596800 | -1.97056800 | -0.28379800 | C | 2.00243500  | -2.23529800 | 2.99335000  |
| H  | -1.81804000 | -2.67540900 | -0.88461700 | C | 0.07367200  | -3.45221900 | 1.91697100  |
| H  | -2.56841300 | -2.46007600 | 0.68794500  | H | 2.17486100  | -3.83690600 | 1.56623500  |
| N  | -3.72440700 | -1.85231100 | -0.95246200 | C | 1.87505500  | -3.13089800 | 4.23517600  |
| C  | -3.73412000 | -1.51093100 | -2.36785100 | H | 1.39675500  | -1.32241900 | 3.13895100  |
| H  | -3.02896600 | -2.16363800 | -2.90867000 | H | 3.04786600  | -1.90879700 | 2.88428000  |
| H  | -4.73928400 | -1.70148600 | -2.78004700 | C | -0.05378000 | -4.35534000 | 3.15299100  |
| C  | -3.39859300 | -0.06381600 | -2.67803000 | H | -0.58529200 | -2.57565400 | 2.04131800  |
| O  | -2.67223600 | 0.26817800  | -3.59122700 | H | -0.28165500 | -3.99061000 | 1.02498000  |
| H  | -3.91035500 | 0.69490400  | -2.04115900 | C | 0.44765900  | -3.65570200 | 4.42043800  |
| S  | -5.14501800 | -1.94909700 | -0.08397900 | H | 2.19808300  | -2.57009200 | 5.12920900  |
| O  | -6.19062700 | -2.36785200 | -1.03284200 | H | 2.56896000  | -3.98614100 | 4.13587800  |
| O  | -4.85790600 | -2.77981700 | 1.09697900  | H | -1.10544200 | -4.66670100 | 3.27584200  |
| C  | -5.58720200 | -0.31774900 | 0.50755600  | H | 0.52901700  | -5.28081800 | 2.98975200  |
| C  | -6.43923800 | 0.48436000  | -0.25715000 | H | 0.39972100  | -4.34180400 | 5.28367000  |
| C  | -5.06821700 | 0.13752600  | 1.72628900  | H | -0.22306800 | -2.80845700 | 4.65598700  |
| C  | -6.76276500 | 1.76268300  | 0.20397700  | C | 2.10326600  | 2.81397800  | 1.56183000  |
| H  | -6.85518300 | 0.11438900  | -1.19590600 | C | 2.54616900  | 4.14033300  | 1.73160700  |
| C  | -5.40386400 | 1.41572300  | 2.16904100  | C | 2.03275800  | 1.98426500  | 2.69452100  |
| H  | -4.41899300 | -0.50181800 | 2.32716000  | C | 2.92272300  | 4.61150300  | 2.99301400  |
| C  | -6.25232900 | 2.25126500  | 1.41800100  | H | 2.59572500  | 4.82179700  | 0.87974300  |
| H  | -7.43114800 | 2.39015300  | -0.39177700 | C | 2.41283400  | 2.45395600  | 3.95692000  |
| H  | -5.00250400 | 1.77189000  | 3.12199000  | H | 1.66647700  | 0.96021900  | 2.58543500  |
| H  | -2.35254700 | 1.47822100  | -0.14847100 | C | 2.86083000  | 3.76893500  | 4.10871900  |
| C  | -6.60945300 | 3.62441800  | 1.92166600  | H | 3.26372000  | 5.64453800  | 3.10425500  |
| H  | -7.19795100 | 3.55940900  | 2.85304200  | H | 2.35140900  | 1.78993600  | 4.82347300  |
| H  | -5.70414800 | 4.20774400  | 2.15794000  | H | 3.15509300  | 4.14025000  | 5.09422500  |
| H  | -7.20103000 | 4.18661600  | 1.18451300  | C | 1.32700500  | -3.05446600 | -1.21895000 |
| C  | 0.70063400  | 3.58781500  | -0.88432400 | C | 1.45098200  | -4.45364500 | -1.13637700 |
| C  | 0.21315300  | 3.24613000  | -2.30584400 | C | 0.88717800  | -2.49381100 | -2.43192400 |
| C  | -0.45491300 | 4.14603300  | -0.03226000 | C | 1.14271200  | -5.26451400 | -2.23446500 |
| H  | 1.47756200  | 4.36824500  | -0.97321600 | H | 1.79269000  | -4.92786500 | -0.21421000 |
| C  | -0.45953900 | 4.45261600  | -2.97797900 | C | 0.59062900  | -3.30261700 | -3.53382000 |

|                 |             |             |             |   |             |             |             |
|-----------------|-------------|-------------|-------------|---|-------------|-------------|-------------|
| H               | 0.76518700  | -1.40967600 | -2.50911300 | C | 5.35989200  | -0.26385200 | -0.58990400 |
| C               | 0.71476800  | -4.69236100 | -3.43672200 | C | 6.42130300  | 0.48189300  | -0.06926900 |
| H               | 1.24058000  | -6.35023200 | -2.14779200 | C | 4.55472100  | 0.24586900  | -1.61655900 |
| H               | 0.25357900  | -2.84377600 | -4.46735600 | C | 6.66822700  | 1.75873700  | -0.57954900 |
| H               | 0.47535500  | -5.32789600 | -4.29371500 | H | 7.05584400  | 0.06973300  | 0.71717400  |
| <b>int-1-L3</b> |             |             |             |   |             |             |             |
| P               | -1.54815200 | -1.94740200 | -0.16532300 | C | 4.81880900  | 1.52111900  | -2.11289500 |
| P               | -1.61490800 | 2.06777800  | 0.14101700  | H | 3.73886800  | -0.34880600 | -2.03115900 |
| C               | -3.47147300 | 1.91103700  | 0.22291700  | C | 5.87494600  | 2.30086100  | -1.60384100 |
| C               | -4.01348700 | 1.11814300  | 1.25256600  | H | 7.49981500  | 2.34199300  | -0.17513800 |
| C               | -4.36764500 | 2.51582200  | -0.67811300 | H | 4.19445100  | 1.91913800  | -2.91780900 |
| C               | -5.39473700 | 0.95673500  | 1.39644800  | H | 2.21736900  | 1.56225900  | 1.11542900  |
| H               | -3.34484900 | 0.60830800  | 1.94828800  | C | 6.14641800  | 3.67259200  | -2.16168700 |
| C               | -5.75068400 | 2.34463900  | -0.54429300 | H | 6.95347700  | 4.18121500  | -1.61462000 |
| H               | -4.00397000 | 3.12549700  | -1.50485800 | H | 6.43848000  | 3.61304500  | -3.22420700 |
| C               | -6.27134800 | 1.57089200  | 0.49630700  | H | 5.24411000  | 4.30474100  | -2.11529000 |
| H               | -5.78551500 | 0.33964400  | 2.21030600  | C | -0.50036900 | -3.10498100 | -1.24068200 |
| H               | -6.42292600 | 2.82284400  | -1.26233400 | C | -1.14959800 | -4.44511200 | -1.62748400 |
| H               | -7.35194100 | 1.44038700  | 0.60091300  | C | 0.04262200  | -2.38526400 | -2.48997300 |
| C               | -3.10014600 | -1.80995000 | -1.18247000 | H | 0.36250600  | -3.32113800 | -0.58798100 |
| C               | -4.19524100 | -2.68804900 | -1.07725700 | C | -0.17291400 | -5.33401200 | -2.41500900 |
| C               | -3.15726600 | -0.79483300 | -2.15531500 | H | -2.04360400 | -4.25626000 | -2.24741700 |
| C               | -5.30606400 | -2.55423600 | -1.91767200 | H | -1.49524900 | -4.98674000 | -0.73260000 |
| H               | -4.19413700 | -3.49288900 | -0.34012400 | C | 1.01540300  | -3.27435800 | -3.27931300 |
| C               | -4.26004400 | -0.66942300 | -3.00658000 | H | -0.79947900 | -2.10443300 | -3.14762800 |
| H               | -2.32747200 | -0.08964000 | -2.24688800 | H | 0.54099800  | -1.44614800 | -2.19778700 |
| C               | -5.34139200 | -1.54796000 | -2.88800600 | C | 0.38153000  | -4.61909700 | -3.65176100 |
| H               | -6.14690500 | -3.24592400 | -1.81393300 | H | -0.67755200 | -6.27136800 | -2.70700700 |
| H               | -4.27662700 | 0.12415200  | -3.75876000 | H | 0.66597100  | -5.62378700 | -1.75530100 |
| H               | -6.20871400 | -1.44742300 | -3.54629200 | H | 1.34943900  | -2.74325700 | -4.18754400 |
| Pd              | -0.27920900 | 0.04316000  | 0.41533000  | H | 1.92207900  | -3.45075900 | -2.67153300 |
| C               | 1.66438600  | -0.62148400 | 0.86510100  | H | 1.11679400  | -5.26033100 | -4.16804400 |
| C               | 1.64374000  | 0.65664800  | 0.93957900  | H | -0.44152200 | -4.44585200 | -4.37021100 |
| C               | 2.43505700  | -1.88776500 | 0.96334400  | C | -2.05220000 | -3.04719400 | 1.27943400  |
| H               | 1.99934500  | -2.52530400 | 1.75075200  | C | -0.83398300 | -3.58067300 | 2.05871800  |
| H               | 2.34533900  | -2.46533500 | 0.03429300  | C | -3.01270700 | -2.31994100 | 2.23977700  |
| N               | 3.87034100  | -1.75782500 | 1.27533300  | H | -2.58061000 | -3.91693300 | 0.85442000  |
| C               | 4.26151900  | -1.43588300 | 2.63863700  | C | -1.26277000 | -4.48547900 | 3.22415600  |
| H               | 3.70876500  | -2.07621000 | 3.34618800  | H | -0.25720400 | -2.72633700 | 2.45538400  |
| H               | 5.33334900  | -1.66146800 | 2.77342900  | H | -0.15664700 | -4.13872100 | 1.39373800  |
| C               | 4.07062200  | 0.01361500  | 3.03904600  | C | -3.44643100 | -3.22400100 | 3.40265000  |
| O               | 3.73534200  | 0.35084400  | 4.15377900  | H | -2.50152300 | -1.42847400 | 2.64516000  |
| H               | 4.30958800  | 0.76675600  | 2.25128900  | H | -3.89991300 | -1.95479200 | 1.69985100  |
| S               | 5.01894100  | -1.89201500 | 0.07266900  | C | -2.24132600 | -3.77966200 | 4.16853000  |
| O               | 6.25569100  | -2.36761500 | 0.71537600  | H | -0.36950400 | -4.82230300 | 3.77806700  |
| O               | 4.40998600  | -2.68782800 | -1.00659000 | H | -1.74010900 | -5.39681200 | 2.81854000  |
|                 |             |             |             | H | -4.10862000 | -2.66129400 | 4.08320900  |



|                 |             |             |             |   |             |            |             |
|-----------------|-------------|-------------|-------------|---|-------------|------------|-------------|
| H               | -4.04715700 | -4.06365700 | 3.00622000  | H | -0.18140500 | 2.31333300 | -2.69357500 |
| H               | -2.57443800 | -4.47031800 | 4.96245800  | H | 0.02897600  | 3.93447700 | -2.02036800 |
| H               | -1.71932200 | -2.94723200 | 4.67625400  | C | -3.41114100 | 2.68293100 | -3.52699100 |
| C               | -1.32743500 | 2.87256800  | -1.55158100 | H | -2.43161200 | 1.09285400 | -2.42850300 |
| C               | -1.61171400 | 4.38435100  | -1.67446500 | H | -3.76046700 | 1.85518500 | -1.55452600 |
| C               | 0.06785400  | 2.55039700  | -2.12687400 | C | -2.25720100 | 3.00279300 | -4.48190200 |
| H               | -2.05745500 | 2.33740000  | -2.18531600 | H | -0.34335800 | 4.04170800 | -4.46920700 |
| C               | -1.49327900 | 4.85606100  | -3.13241400 | H | -1.63280600 | 4.87365800 | -3.58962300 |
| H               | -0.88378800 | 4.94504700  | -1.06529900 | H | -4.12926700 | 1.99602100 | -4.00762400 |
| H               | -2.60613800 | 4.64164300  | -1.28005500 | H | -3.96975900 | 3.61105700 | -3.30346300 |
| C               | 0.19985800  | 3.03035600  | -3.57983200 | H | -2.63476400 | 3.49930100 | -5.39263700 |
| H               | 0.84585900  | 3.03425800  | -1.51033700 | H | -1.78732200 | 2.05759800 | -4.81198000 |
| H               | 0.25705700  | 1.46659800  | -2.06821600 | C | -2.61855100 | 2.58934700 | 1.42170700  |
| C               | -0.12028300 | 4.52203900  | -3.72531600 | C | -4.04923900 | 2.87472700 | 0.92854300  |
| H               | -1.68099300 | 5.94245600  | -3.18668700 | C | -2.63623900 | 1.51873100 | 2.53054900  |
| H               | -2.28186700 | 4.37204800  | -3.73816400 | H | -2.26489300 | 3.52448600 | 1.88539000  |
| H               | 1.21771000  | 2.81796200  | -3.95063000 | C | -4.96251900 | 3.28698600 | 2.09477500  |
| H               | -0.49163900 | 2.44644800  | -4.21557200 | H | -4.47256300 | 1.97691500 | 0.44950400  |
| H               | -0.07619200 | 4.82247800  | -4.78650600 | H | -4.04806800 | 3.67111800 | 0.16830700  |
| H               | 0.65367500  | 5.11290800  | -3.20067000 | C | -3.55583300 | 1.92076600 | 3.69312700  |
| C               | -1.33300300 | 3.46520200  | 1.39844100  | H | -2.98309100 | 0.56188400 | 2.10651200  |
| C               | -1.77366300 | 3.08698800  | 2.82588000  | H | -1.61700300 | 1.33688900 | 2.90693400  |
| C               | 0.12974300  | 3.94869200  | 1.42204800  | C | -4.97581600 | 2.23706900 | 3.21112300  |
| H               | -1.97415700 | 4.29611000  | 1.05616800  | H | -5.98618900 | 3.46164500 | 1.72014700  |
| C               | -1.57039700 | 4.24968900  | 3.81027600  | H | -4.61232400 | 4.25192000 | 2.50648100  |
| H               | -1.19068800 | 2.21065000  | 3.16503600  | H | -3.57666100 | 1.11586300 | 4.44842400  |
| H               | -2.83191000 | 2.78809700  | 2.84168300  | H | -3.13591400 | 2.81076800 | 4.19801400  |
| C               | 0.32225200  | 5.12701400  | 2.38833500  | H | -5.60052100 | 2.58076500 | 4.05382300  |
| H               | 0.77271700  | 3.11519700  | 1.74624700  | H | -5.44575400 | 1.31042600 | 2.83197600  |
| H               | 0.47056500  | 4.23448100  | 0.41573400  | C | 0.05941200  | 3.43399100 | 0.67279600  |
| C               | -0.12941600 | 4.76863000  | 3.80728400  | C | -0.33307300 | 4.92521200 | 0.68051500  |
| H               | -1.86211500 | 3.92823800  | 4.82516500  | C | 0.67522500  | 3.03662900 | 2.02992400  |
| H               | -2.25415600 | 5.07479100  | 3.53680400  | H | 0.84526000  | 3.30596400 | -0.08783300 |
| H               | 1.38198900  | 5.43585500  | 2.38820900  | C | 0.86505500  | 5.81758500 | 1.04566900  |
| H               | -0.25684600 | 5.99693700  | 2.02646900  | H | -1.13821600 | 5.10172300 | 1.41507700  |
| H               | -0.03402700 | 5.64158100  | 4.47607600  | H | -0.73190700 | 5.23336000 | -0.29855000 |
| H               | 0.53995600  | 3.98761400  | 4.21366500  | C | 1.86745100  | 3.93208800 | 2.40102800  |
| <b>int-1-L4</b> |             |             |             | H | -0.08942300 | 3.12290600 | 2.82217900  |
| P               | -1.27616200 | 2.20479200  | 0.11498400  | H | 0.98823200  | 1.97935500 | 2.01003900  |
| P               | -1.72652800 | -1.96994600 | -0.10834300 | C | 1.48867500  | 5.41696000 | 2.38658200  |
| Pd              | -0.23303700 | -0.00623100 | -0.22429600 | H | 0.54679200  | 6.87438200 | 1.07050800  |
| C               | -1.87610400 | 2.97014700  | -1.50824000 | H | 1.62997600  | 5.74111800 | 0.25070400  |
| C               | -0.70980900 | 3.25969100  | -2.47735200 | H | 2.25238400  | 3.64449400 | 3.39496700  |
| C               | -2.90758900 | 2.06663400  | -2.21379300 | H | 2.69314900  | 3.75812000 | 1.68695800  |
| H               | -2.36233400 | 3.92928500  | -1.25916300 | H | 2.37335000  | 6.04137800 | 2.60076600  |
| C               | -1.20230500 | 3.87601300  | -3.79590900 | H | 0.76289400  | 5.61487200 | 3.19767900  |

C -1.01118400 -3.49225100 -0.98154900  
C -0.65498800 -3.14321900 -2.44383000  
C 0.18845600 -4.15312600 -0.27307300  
H -1.82144500 -4.23975300 -0.99782300  
C -0.12633300 -4.35819200 -3.21911700  
H 0.11619000 -2.35367900 -2.44761500  
H -1.52838000 -2.72211700 -2.96761200  
C 0.73011600 -5.35412400 -1.06630500  
H 0.99622500 -3.42002500 -0.13300000  
H -0.09985900 -4.49105100 0.73289900  
C 1.07700600 -4.99037000 -2.51377100  
H 0.14441200 -4.05342300 -4.24493400  
H -0.93037600 -5.11124400 -3.31831700  
H 1.61392800 -5.76706400 -0.54950300  
H -0.03008300 -6.15764500 -1.07121900  
H 1.41959700 -5.88550600 -3.06152900  
H 1.91871400 -4.27278700 -2.52894500  
C -2.14538300 -2.50533000 1.65485200  
C -2.80291000 -3.88576300 1.84850900  
C -0.94909400 -2.32439400 2.61460500  
H -2.88945700 -1.74340700 1.94658600  
C -3.19630600 -4.12179600 3.31609000  
H -2.10563900 -4.68084700 1.53366500  
H -3.69508500 -3.98248900 1.21240300  
C -1.35553300 -2.56400600 4.07567000  
H -0.14189500 -3.02750900 2.34806900  
H -0.52874900 -1.31177600 2.49788600  
C -2.00899000 -3.93721100 4.26674500  
H -3.62493500 -5.13304200 3.42766900  
H -3.99727600 -3.41159700 3.59429400  
H -0.47211300 -2.46395500 4.73002000  
H -2.06667800 -1.77674400 4.38858200  
H -2.33261300 -4.06677300 5.31412100  
H -1.25961100 -4.72711500 4.07132000  
C -3.41249700 -1.80095500 -0.99215200  
C -4.09947000 -3.07184500 -1.53596400  
C -4.41505900 -0.98396400 -0.15683000  
H -3.14188200 -1.18244000 -1.86689600  
C -5.36787800 -2.72443400 -2.33326600  
H -4.37383600 -3.73929800 -0.70178000  
H -3.42224200 -3.64354500 -2.18616200  
C -5.68320100 -0.63778700 -0.95048600  
H -4.70920200 -1.56309300 0.73609200  
H -3.94018600 -0.06264000 0.20951300  
C -6.35772600 -1.89276800 -1.51252900  
H -5.84661400 -3.65413000 -2.68710100

H -5.08060100 -2.15822400 -3.23889500  
H -6.38421400 -0.07994100 -0.30548400  
H -5.41940800 0.03821900 -1.78402900  
H -7.23274600 -1.61834600 -2.12692200  
H -6.74252700 -2.50555200 -0.67588000  
C 1.78483700 0.42173800 -0.69903600  
C 1.62519400 -0.84490300 -0.60364800  
C 2.71153400 1.53472900 -1.02730600  
H 2.28035600 2.14902000 -1.83657700  
H 2.82640200 2.21291500 -0.17210800  
N 4.06071500 1.13016500 -1.47086600  
C 4.19603600 0.43536700 -2.74311100  
H 3.56871500 0.93099100 -3.50219600  
H 5.24142300 0.51073700 -3.08797700  
C 3.85842400 -1.04240000 -2.70830300  
O 3.30007100 -1.62105100 -3.61661000  
H 4.21018600 -1.59098000 -1.80352500  
S 5.38563700 1.37119600 -0.48738300  
O 6.56418300 1.43129200 -1.36892700  
O 5.06914200 2.51920700 0.37891600  
C 5.58662300 -0.05742100 0.57355300  
C 6.46048600 -1.08216700 0.19012200  
C 4.85957700 -0.13865000 1.76511600  
C 6.59257400 -2.20162800 1.01049000  
H 7.03684900 -1.00079800 -0.73305400  
C 5.00582000 -1.26877000 2.57250800  
H 4.19428400 0.67137700 2.06931100  
C 5.86818100 -2.31775800 2.21149600  
H 7.27730800 -3.00149500 0.71463500  
H 4.44034000 -1.33222000 3.50597500  
H 2.09424600 -1.82048900 -0.67116600  
C 6.03146100 -3.53357800 3.08449500  
H 7.06902900 -3.61805400 3.45034600  
H 5.36345100 -3.50047400 3.95750800  
H 5.81724900 -4.45670000 2.52041800

**int-2-L4**

P 0.90429200 -2.58039700 -0.27417200  
P 1.69470400 2.20523300 -0.08506800  
Pd 1.15943700 -0.16867200 -0.11557400  
C -0.53209400 -3.14862700 -1.35603400  
C -1.88472500 -3.27563100 -0.62435700  
C -0.70398900 -2.22981000 -2.58593000  
H -0.24457100 -4.15550600 -1.70823800  
C -2.97353800 -3.81043600 -1.56827200  
H -2.18913600 -2.28876900 -0.24003700  
H -1.80991900 -3.93882300 0.24782700

|   |             |             |             |   |             |            |             |
|---|-------------|-------------|-------------|---|-------------|------------|-------------|
| C | -1.78449900 | -2.76017200 | -3.53917800 | C | 2.85537200  | 2.06203400 | 2.47742500  |
| H | -0.99021600 | -1.22320600 | -2.23300700 | H | 2.51892200  | 3.91293600 | 1.41786900  |
| H | 0.24342000  | -2.10739800 | -3.12979800 | C | 0.95777200  | 3.96428600 | 3.71087900  |
| C | -3.12696300 | -2.94849800 | -2.82557300 | H | 0.05049900  | 2.43247000 | 2.47424300  |
| H | -3.93244500 | -3.87009500 | -1.02531100 | H | 0.06420500  | 4.04049700 | 1.74073900  |
| H | -2.71719000 | -4.84508300 | -1.86301900 | C | 3.13910400  | 2.69345100 | 3.84765300  |
| H | -1.89618100 | -2.07001600 | -4.39319000 | H | 2.34174000  | 1.09526400 | 2.62087200  |
| H | -1.45284000 | -3.72726200 | -3.96067100 | H | 3.80455000  | 1.83826900 | 1.96430900  |
| H | -3.86684900 | -3.39781000 | -3.51038300 | C | 1.84432100  | 3.06435400 | 4.57818100  |
| H | -3.52756400 | -1.95867300 | -2.53960200 | H | 0.00642600  | 4.17923400 | 4.22714100  |
| C | 2.43773800  | -3.39711700 | -1.02856300 | H | 1.46093700  | 4.93830700 | 3.56467700  |
| C | 2.47922200  | -3.45157900 | -2.56826200 | H | 3.74136200  | 1.99871400 | 4.45803400  |
| C | 3.73904600  | -2.76056800 | -0.49640100 | H | 3.75416000  | 3.60200400 | 3.70916000  |
| H | 2.38765300  | -4.43909100 | -0.66664300 | H | 2.07333400  | 3.56147900 | 5.53658200  |
| C | 3.72201800  | -4.20778500 | -3.06433200 | H | 1.29041600  | 2.14062600 | 4.82838300  |
| H | 2.49360700  | -2.42480800 | -2.97598400 | C | 3.30878200  | 2.43336200 | -1.04746700 |
| H | 1.58065300  | -3.94367600 | -2.96828400 | C | 4.23001600  | 3.57857400 | -0.58177500 |
| C | 4.98271600  | -3.51486000 | -0.98833300 | C | 4.10338500  | 1.11825100 | -1.16660800 |
| H | 3.78918100  | -1.71553000 | -0.84515500 | H | 2.94931600  | 2.68526200 | -2.06096200 |
| H | 3.74168600  | -2.72124300 | 0.60195000  | C | 5.43813700  | 3.73286800 | -1.51906200 |
| C | 5.02100400  | -3.60941800 | -2.51661700 | H | 4.59752500  | 3.36616900 | 0.43643000  |
| H | 3.73376500  | -4.20986300 | -4.16791700 | H | 3.67974100  | 4.52951800 | -0.52729400 |
| H | 3.64713400  | -5.26558000 | -2.75110000 | C | 5.32186200  | 1.27213300 | -2.08838300 |
| H | 5.89133000  | -3.01566700 | -0.60995800 | H | 4.43832700  | 0.79591300 | -0.16492900 |
| H | 4.98333900  | -4.53337700 | -0.55772100 | H | 3.44992100  | 0.31713900 | -1.55408700 |
| H | 5.88784600  | -4.20878100 | -2.84423900 | C | 6.22839900  | 2.42658200 | -1.64847800 |
| H | 5.16230000  | -2.59770400 | -2.94021600 | H | 6.09078200  | 4.54183400 | -1.14818000 |
| C | 0.66411000  | -3.47418200 | 1.36099500  | H | 5.08558500  | 4.04847500 | -2.51845200 |
| C | 0.47603400  | -5.00389000 | 1.28016000  | H | 5.88912900  | 0.32617700 | -2.11616100 |
| C | 1.75133000  | -3.16164800 | 2.41179900  | H | 4.97072200  | 1.45798600 | -3.12031900 |
| H | -0.27576300 | -3.03401900 | 1.73727000  | H | 7.06223700  | 2.55063900 | -2.36067100 |
| C | 0.05472900  | -5.56207100 | 2.65021600  | H | 6.68456900  | 2.17992600 | -0.67171500 |
| H | 1.42553400  | -5.47741500 | 0.97411200  | C | 0.46126200  | 3.31395100 | -0.96179100 |
| H | -0.27111600 | -5.28542200 | 0.52332600  | C | 0.85874000  | 4.79877500 | -1.07875600 |
| C | 1.32765200  | -3.68733900 | 3.79195800  | C | 0.07473400  | 2.74627500 | -2.34345700 |
| H | 2.69651300  | -3.64993600 | 2.12028000  | H | -0.43417700 | 3.25821600 | -0.31926600 |
| H | 1.95868900  | -2.08106900 | 2.45959200  | C | -0.26578200 | 5.62199600 | -1.72630700 |
| C | 1.05465800  | -5.19604300 | 3.75388000  | H | 1.76664100  | 4.88937300 | -1.69942500 |
| H | -0.05917300 | -6.65811900 | 2.58564900  | H | 1.10462200  | 5.21678000 | -0.08997100 |
| H | -0.93991600 | -5.15659000 | 2.91049100  | C | -1.03685500 | 3.57838200 | -3.00094400 |
| H | 2.11128800  | -3.46013900 | 4.53556200  | H | 0.96007300  | 2.74288100 | -3.00437500 |
| H | 0.41684800  | -3.14926800 | 4.10938700  | H | -0.24667000 | 1.69582700 | -2.24669000 |
| H | 0.68388800  | -5.54367400 | 4.73372000  | C | -0.66139400 | 5.06125300 | -3.09645500 |
| H | 2.00560200  | -5.73130700 | 3.57215600  | H | 0.05278200  | 6.67464400 | -1.81857700 |
| C | 1.97025200  | 2.97447300  | 1.60297800  | H | -1.14838100 | 5.61767800 | -1.06062400 |
| C | 0.66467400  | 3.33785600  | 2.33877000  | H | -1.26069200 | 3.17229700 | -4.00239800 |

|                |             |             |             |   |             |             |             |
|----------------|-------------|-------------|-------------|---|-------------|-------------|-------------|
| H              | -1.96135500 | 3.47764800  | -2.40478100 | H | -1.31893800 | -4.96889500 | 4.39707000  |
| H              | -1.49955700 | 5.64056700  | -3.52050700 | C | -3.96562200 | -0.87798000 | 0.08373400  |
| H              | 0.18675600  | 5.17934900  | -3.79661100 | C | -4.98000600 | -1.02275800 | -0.87712200 |
| C              | -0.48069900 | -0.00226900 | 1.02180100  | C | -4.22605400 | -0.10573200 | 1.23209300  |
| C              | -0.48966200 | -0.38471100 | 2.30014500  | C | -6.22733500 | -0.41433600 | -0.69133600 |
| C              | -1.70773400 | 0.55768000  | 0.33892900  | H | -4.80526300 | -1.61143900 | -1.77981000 |
| N              | -2.70410700 | 0.91256700  | 1.36507200  | C | -5.47449300 | 0.49247300  | 1.41872900  |
| C              | -2.99705500 | -0.17009800 | 2.31146000  | H | -3.45224200 | 0.02532500  | 1.99215700  |
| C              | -1.75582500 | -0.50914300 | 3.18006500  | C | -6.47964500 | 0.34228000  | 0.45597100  |
| O              | -1.86185000 | -1.73936800 | 3.73551800  | H | -7.00546600 | -0.53888900 | -1.44949700 |
| H              | -1.67484600 | 0.32844000  | 3.93589300  | H | -5.66084500 | 1.08235100  | 2.32026000  |
| S              | -3.91787600 | 1.97972000  | 0.95589500  | H | -7.45517300 | 0.81417100  | 0.60112200  |
| O              | -4.55808100 | 2.39343300  | 2.21555800  | C | -2.49217600 | -2.77542000 | -1.54781500 |
| O              | -3.30541500 | 3.00896200  | 0.09287600  | C | -3.04703100 | -4.05487700 | -1.37110800 |
| C              | -5.15548300 | 1.12312500  | -0.01712100 | C | -2.08880000 | -2.38220000 | -2.83606400 |
| C              | -6.25122800 | 0.53814800  | 0.62560900  | C | -3.19309800 | -4.91972100 | -2.46006000 |
| C              | -5.00224300 | 1.02506200  | -1.40689200 | H | -3.36615000 | -4.38654100 | -0.38067400 |
| C              | -7.19502100 | -0.15733300 | -0.13404700 | C | -2.24405000 | -3.24497900 | -3.92606900 |
| H              | -6.37681800 | 0.63618400  | 1.70518500  | H | -1.64300700 | -1.39468200 | -2.98653600 |
| C              | -5.95567000 | 0.32762900  | -2.14740600 | C | -2.79376600 | -4.51707300 | -3.73931300 |
| H              | -4.15605600 | 1.49785900  | -1.90826200 | H | -3.62067200 | -5.91440800 | -2.30679500 |
| C              | -7.06558200 | -0.27717800 | -1.52720500 | H | -1.92607100 | -2.92364700 | -4.92159100 |
| H              | -8.05335500 | -0.61085600 | 0.36883400  | H | -2.90721600 | -5.19638000 | -4.58856900 |
| H              | -5.84019800 | 0.25658600  | -3.23267500 | C | 0.61924900  | 3.28915800  | 0.12817000  |
| H              | 0.41401800  | -0.74293400 | 2.79898400  | C | 0.92391200  | 3.97636100  | -1.06155300 |
| H              | -3.27579500 | -1.09372600 | 1.76883200  | C | 1.45077400  | 3.47378200  | 1.24599500  |
| H              | -3.83389200 | 0.11944700  | 2.95960100  | C | 2.02610600  | 4.83252000  | -1.12629300 |
| H              | -1.45992400 | 1.45928800  | -0.22999200 | H | 0.30103400  | 3.84340900  | -1.94964400 |
| H              | -2.12430200 | -0.17645900 | -0.37704500 | C | 2.55932800  | 4.32533800  | 1.17524400  |
| C              | -8.08493500 | -1.02149000 | -2.34824000 | H | 1.24072800  | 2.95297900  | 2.18260400  |
| H              | -8.87408300 | -1.45738400 | -1.71844700 | C | 2.85124900  | 5.00701400  | -0.00960900 |
| H              | -8.56320000 | -0.35216000 | -3.08346300 | H | 2.24402700  | 5.36203700  | -2.05789100 |
| H              | -7.61144400 | -1.83643000 | -2.92111400 | H | 3.19476400  | 4.45626200  | 2.05536700  |
| <b>TS-endo</b> |             |             |             | H | 3.71684100  | 5.67259500  | -0.06318900 |
| P              | -0.77115000 | 2.06265400  | 0.14927100  | C | -1.28011900 | 2.03546900  | 1.93165600  |
| P              | -2.26628500 | -1.57147100 | -0.15678000 | C | -2.18579500 | 2.94868700  | 2.49737700  |
| C              | -2.02456900 | -2.65288100 | 1.32658300  | C | -0.72119000 | 1.03874500  | 2.75215600  |
| C              | -0.70518900 | -2.96019000 | 1.70445400  | C | -2.51999100 | 2.86655600  | 3.85325900  |
| C              | -3.08652200 | -3.18966900 | 2.07594800  | H | -2.64660700 | 3.72618700  | 1.88640000  |
| C              | -0.45227800 | -3.79363400 | 2.79827800  | C | -1.04818700 | 0.96494500  | 4.10964500  |
| H              | 0.13182600  | -2.54025400 | 1.13946700  | H | -0.02998900 | 0.30899400  | 2.32164200  |
| C              | -2.83142400 | -4.01753700 | 3.17421300  | C | -1.95146400 | 1.87797900  | 4.66322600  |
| H              | -4.12066500 | -2.96364700 | 1.80781500  | H | -3.23095200 | 3.58120100  | 4.27682000  |
| C              | -1.51545300 | -4.32275900 | 3.53718200  | H | -0.60201200 | 0.18503000  | 4.73247900  |
| H              | 0.57963600  | -4.02318100 | 3.07730300  | H | -2.21549100 | 1.81667700  | 5.72247100  |
| H              | -3.66767100 | -4.42663500 | 3.74781500  | C | -2.11334300 | 2.95733200  | -0.75501000 |

|               |             |             |             |   |             |             |             |
|---------------|-------------|-------------|-------------|---|-------------|-------------|-------------|
| C             | -2.33466000 | 4.34008000  | -0.60482500 | C | -5.39290400 | 0.12413100  | -0.19486000 |
| C             | -2.93273600 | 2.23272300  | -1.63601500 | C | -4.75395500 | -0.64493200 | -2.80875700 |
| C             | -3.36350500 | 4.97295200  | -1.30737000 | H | -2.80979500 | 0.21498100  | -2.42658400 |
| H             | -1.69784200 | 4.93347500  | 0.05469500  | C | -6.33722100 | -0.54265000 | -0.98227000 |
| C             | -3.96192400 | 2.86830600  | -2.33922400 | H | -5.65960600 | 0.41480400  | 0.82275800  |
| H             | -2.75762400 | 1.16432800  | -1.77837800 | C | -6.02195600 | -0.92647600 | -2.28965900 |
| C             | -4.18095500 | 4.23854100  | -2.17425800 | H | -4.49770900 | -0.94505700 | -3.82827200 |
| H             | -3.52409300 | 6.04689900  | -1.17946500 | H | -7.32515400 | -0.76259600 | -0.56863300 |
| H             | -4.58926100 | 2.28852200  | -3.02135500 | H | -6.76232000 | -1.44838700 | -2.90192500 |
| H             | -4.98293200 | 4.73727600  | -2.72526700 | C | -3.28733000 | 1.09454000  | 2.03538000  |
| Pd            | -0.32363200 | -0.11187800 | -0.59647600 | C | -4.32671800 | 1.83950900  | 2.62318600  |
| C             | 1.59695000  | -0.02578600 | -1.27213200 | C | -2.58850500 | 0.16330400  | 2.82215200  |
| C             | 1.57692600  | -1.29688000 | -1.51775900 | C | -4.66313200 | 1.64494600  | 3.96600000  |
| C             | 2.63626200  | 1.01331700  | -1.51923500 | H | -4.87663600 | 2.57864500  | 2.03670500  |
| H             | 2.30072800  | 1.68758500  | -2.32685600 | C | -2.92867800 | -0.03029100 | 4.16506900  |
| H             | 2.78932800  | 1.64898100  | -0.63887800 | H | -1.76587800 | -0.40582000 | 2.38349000  |
| N             | 3.91349000  | 0.40433000  | -1.91404500 | C | -3.96690200 | 0.70920200  | 4.73909500  |
| C             | 3.86476500  | -0.65434500 | -2.91386400 | H | -5.47256100 | 2.23047900  | 4.41028400  |
| H             | 3.31191600  | -0.28438000 | -3.79399000 | H | -2.37312700 | -0.75668800 | 4.76409300  |
| H             | 4.89163500  | -0.86962700 | -3.24811200 | H | -4.23017600 | 0.56209100  | 5.79005000  |
| C             | 3.24030500  | -1.99329500 | -2.49212600 | C | -3.15470100 | 3.08222500  | -0.06536400 |
| O             | 2.88992600  | -2.78819800 | -3.39255500 | C | -3.92824300 | 3.51284300  | -1.15638800 |
| H             | 3.63290500  | -2.38567700 | -1.52370500 | C | -2.54686900 | 4.04838600  | 0.75997600  |
| S             | 5.27323400  | 0.65173400  | -0.98385600 | C | -4.10212900 | 4.87860700  | -1.40651300 |
| O             | 6.42912400  | 0.32972500  | -1.83742200 | H | -4.40622800 | 2.78604600  | -1.81607800 |
| O             | 5.14295100  | 2.00391400  | -0.41371200 | C | -2.72810600 | 5.41119300  | 0.51005100  |
| C             | 5.28957300  | -0.50170200 | 0.38838700  | H | -1.93429200 | 3.73823400  | 1.61086500  |
| C             | 5.96940800  | -1.71919100 | 0.25660900  | C | -3.50650900 | 5.83083700  | -0.57439700 |
| C             | 4.62190300  | -0.17612500 | 1.57310900  | H | -4.71241900 | 5.19654200  | -2.25624400 |
| C             | 5.96330900  | -2.61817600 | 1.32179400  | H | -2.25497000 | 6.14789000  | 1.16486600  |
| H             | 6.50738000  | -1.95521400 | -0.66313200 | H | -3.64615700 | 6.89727900  | -0.77054900 |
| C             | 4.62520800  | -1.09202800 | 2.62803100  | C | 0.78637800  | -2.44792000 | -1.47643300 |
| H             | 4.11587300  | 0.78478200  | 1.68231400  | C | 1.81485100  | -3.37372400 | -1.23342500 |
| C             | 5.28911500  | -2.32551900 | 2.52219100  | C | 0.73621400  | -1.79996500 | -2.72546500 |
| H             | 6.49847700  | -3.56672700 | 1.22164800  | C | 2.77009600  | -3.64528700 | -2.21960200 |
| H             | 4.10672600  | -0.83671700 | 3.55615700  | H | 1.87863000  | -3.88828400 | -0.27249800 |
| H             | 0.93223800  | -2.17051400 | -1.40210500 | C | 1.68457800  | -2.08187300 | -3.71249800 |
| C             | 5.28972800  | -3.31494600 | 3.65713800  | H | -0.04950600 | -1.06579700 | -2.92633500 |
| H             | 4.77715400  | -4.24750600 | 3.36500700  | C | 2.70711400  | -3.00276700 | -3.45982500 |
| H             | 6.31877200  | -3.59314500 | 3.93951500  | H | 3.56761300  | -4.36470200 | -2.01465100 |
| H             | 4.78446200  | -2.91281500 | 4.54732300  | H | 1.63060500  | -1.57115900 | -4.67764000 |
| <b>TS-exo</b> |             |             |             | H | 3.45739300  | -3.21379500 | -4.22642000 |
| P             | -0.49050500 | -1.98630100 | -0.22016900 | C | -1.90957900 | -3.11403600 | -0.58258800 |
| P             | -2.81674200 | 1.29714300  | 0.26052200  | C | -1.90235100 | -4.04137300 | -1.63695000 |
| C             | -4.11664700 | 0.40980100  | -0.70827900 | C | -3.06025400 | -3.00642200 | 0.22122600  |
| C             | -3.80468200 | 0.01198100  | -2.02070700 | C | -3.02140600 | -4.84711600 | -1.87938000 |

H -1.02320800 -4.14361900 -2.27612500  
C -4.17079600 -3.81935200 -0.01638000  
H -3.09010500 -2.28537500 1.04239300  
C -4.15561500 -4.74112500 -1.07017500  
H -3.00054800 -5.56389400 -2.70494800  
H -5.05461100 -3.72774200 0.62052500  
H -5.02761400 -5.37274000 -1.26011500  
C 0.18549000 -2.63312100 1.37270500  
C 0.00203500 -3.95622800 1.80998700  
C 0.92602400 -1.74644500 2.17491700  
C 0.55392600 -4.38222800 3.02264800  
H -0.57227300 -4.66172800 1.20514300  
C 1.48366400 -2.17634000 3.38296100  
H 1.06001800 -0.70885600 1.85288800  
C 1.29664900 -3.49549300 3.80972200  
H 0.40306600 -5.41369200 3.35273700  
H 2.05795700 -1.47593600 3.99524700  
H 1.72548600 -3.83142100 4.75774400  
Pd -0.69757000 0.50131100 -0.24963700  
C 1.36440400 2.10027700 -0.82108800  
C 0.11573500 2.31566700 -0.54706300  
C 2.44782900 1.08458500 -0.93015200  
H 2.21860800 0.26877800 -1.62807400  
H 2.65023200 0.63729100 0.06213500  
N 3.64817600 1.80685500 -1.43343800  
C 3.70804100 3.17929400 -0.94833400  
H 4.48352300 3.73061200 -1.50103500  
H 3.91392900 3.25384900 0.13714600  
C 2.34880600 3.82602100 -1.23283300  
O 1.96130800 4.81023100 -0.55952200  
H 2.07797100 3.74992500 -2.31541000  
S 5.05516700 0.94343800 -1.64759900  
O 5.99482200 1.83461200 -2.34706400  
O 4.66313000 -0.33269000 -2.27037300  
C 5.74600500 0.57736400 -0.03731400  
C 6.60683600 1.50224300 0.56964900  
C 5.39776200 -0.61276900 0.60978200  
C 7.11119600 1.22634900 1.83912900  
H 6.89078800 2.41877000 0.04919100  
C 5.91407800 -0.86995900 1.88224800  
H 4.74376600 -1.33786500 0.12242900  
C 6.77368800 0.04042100 2.51863800  
H 7.78713900 1.94445200 2.31201800  
H 5.64545200 -1.80156100 2.38746100  
H -0.41085600 3.27348900 -0.49625300  
C 7.33222300 -0.23612700 3.88925900

H 6.98028100 -1.19987300 4.28499800  
H 7.04060100 0.55534200 4.60022700  
H 8.43504100 -0.25427900 3.86923900

**TS-endo-side**

P -0.71065900 2.09190700 -0.18072900  
P -2.50470700 -1.43144200 0.02102100  
C -1.89824400 -2.29107900 1.54346600  
C -0.51157500 -2.47994000 1.68115700  
C -2.75076700 -2.75902500 2.55966100  
C 0.01227400 -3.12910500 2.80341000  
H 0.16705200 -2.11868200 0.90500800  
C -2.22458500 -3.40384200 3.68380400  
H -3.83138100 -2.62030400 2.48028100  
C -0.84316200 -3.59092700 3.80856600  
H 1.09426200 -3.26277200 2.88662300  
H -2.89914100 -3.76195100 4.46647800  
H -0.43529000 -4.09300700 4.69022000  
C -4.10835000 -0.68071500 0.56847100  
C -5.32686900 -0.93185900 -0.08361000  
C -4.08857600 0.24389600 1.63070400  
C -6.49749400 -0.27687200 0.31872700  
H -5.37438000 -1.64221500 -0.91125700  
C -5.25951100 0.88817200 2.03627400  
H -3.15297100 0.45896400 2.15241700  
C -6.46913100 0.63238800 1.37921200  
H -7.43691800 -0.48636400 -0.20044300  
H -5.22482200 1.59725000 2.86792300  
H -7.38459700 1.14057200 1.69402800  
C -3.04664100 -2.80226200 -1.10375500  
C -3.34710600 -4.09921100 -0.65542600  
C -3.14900100 -2.51945400 -2.47839100  
C -3.74204700 -5.08899100 -1.56232600  
H -3.27075100 -4.34881600 0.40474900  
C -3.55645300 -3.50576700 -3.38150000  
H -2.90469500 -1.51885400 -2.84663900  
C -3.85053400 -4.79534900 -2.92516700  
H -3.96536800 -6.09579900 -1.19869500  
H -3.63513400 -3.26765300 -4.44578800  
H -4.15911400 -5.57097800 -3.63133400  
C 0.75979300 3.14332300 -0.59530200  
C 1.01814100 3.40798600 -1.95420900  
C 1.65221400 3.63340100 0.37062800  
C 2.13263800 4.15742600 -2.33427600  
H 0.34328900 3.02339800 -2.72459400  
C 2.77565400 4.37744100 -0.01395000  
H 1.48061500 3.44005500 1.43109600

C 3.01838300 4.64354400 -1.36370600  
H 2.31415600 4.35929100 -3.39355600  
H 3.46011100 4.75301500 0.75171700  
H 3.89404100 5.22677900 -1.66114800  
C -0.84342000 2.23087800 1.65907300  
C -1.66276300 3.16776100 2.31055400  
C -0.09798300 1.32351800 2.43501600  
C -1.73225800 3.19706700 3.70798100  
H -2.25839000 3.87827600 1.73493700  
C -0.16091900 1.36251900 3.83071600  
H 0.54002100 0.58376300 1.94508900  
C -0.98190800 2.29725900 4.47121500  
H -2.37826400 3.92921100 4.20030200  
H 0.42776500 0.65290000 4.41823500  
H -1.03887600 2.32181900 5.56286500  
C -2.10386500 3.10912700 -0.85236600  
C -2.07872500 4.51634000 -0.83931500  
C -3.21814200 2.45594300 -1.40483500  
C -3.15025900 5.24877500 -1.35789400  
H -1.21850200 5.04795900 -0.42605400  
C -4.29009100 3.19069300 -1.92305000  
H -3.24256300 1.36437100 -1.43527900  
C -4.25865300 4.58794700 -1.89983700  
H -3.11729900 6.34161100 -1.34067600  
H -5.14909100 2.66664500 -2.35050700  
H -5.09404200 5.16321200 -2.30826300  
Pd -0.67111100 -0.12185100 -0.95822700  
C 1.09273300 -0.28263200 -1.96581400  
C 0.65303400 -1.38337600 -2.48466500  
C 2.48618100 0.20778400 -1.71375900  
H 2.95474900 0.55086100 -2.65314200  
H 2.50950700 1.03905000 -1.00383600  
N 3.27845300 -0.90995300 -1.18217000  
C 3.29013200 -2.12375400 -1.98972300  
H 3.59153100 -1.84592700 -3.01325800  
H 4.05084500 -2.82006900 -1.60078800  
C 1.96524100 -2.91215700 -2.05847800  
O 1.44892700 -3.43534500 -1.04910100  
H 1.84016600 -3.39581900 -3.05757400  
S 3.75896800 -0.94856700 0.41595600  
O 3.18331500 0.24376900 1.06657700  
O 3.47793500 -2.28226700 0.97532300  
C 5.53651100 -0.74984000 0.39318200  
C 6.07886300 0.52791700 0.19745400  
C 6.36040500 -1.86335800 0.57006600  
C 7.46305200 0.67626100 0.16955800

H 5.42907200 1.39727700 0.07664000  
C 7.74756400 -1.69275500 0.53743000  
H 5.92699600 -2.85002800 0.74120100  
C 8.32200800 -0.42834900 0.33605500  
H 7.88988300 1.67218700 0.02058800  
H 8.39375600 -2.56346000 0.67718100  
H -0.22502600 -1.93520300 -2.80845100  
C 9.81556400 -0.24169800 0.30240100  
H 10.13809500 0.18179700 -0.66398500  
H 10.14263000 0.46511400 1.08372100  
H 10.34747400 -1.19213300 0.45494800

**TS-endo-MeOH**

P 0.78549000 -2.26141600 -0.17694700  
P 2.28303600 1.44779800 0.20675900  
C 1.79548400 2.80636700 1.37830900  
C 0.83284400 3.73556300 0.94061600  
C 2.29591900 2.92419300 2.68501800  
C 0.38664000 4.75598800 1.78220700  
H 0.42795800 3.68293300 -0.07188900  
C 1.84084200 3.94370800 3.53136000  
H 3.04791400 2.22591300 3.05630300  
C 0.88641500 4.86163800 3.08572500  
H -0.35793100 5.46476700 1.40967400  
H 2.24273400 4.01849200 4.54565200  
H 0.53429500 5.65655200 3.74875400  
C 3.76972500 0.69502300 1.01550000  
C 5.08724500 0.93824100 0.59258600  
C 3.55582400 -0.19984000 2.08072600  
C 6.16419500 0.30667100 1.22554600  
H 5.28589300 1.61916500 -0.23675600  
C 4.63361000 -0.81840100 2.72024700  
H 2.53899100 -0.41586300 2.41663800  
C 5.94216300 -0.56914200 2.29192600  
H 7.18280700 0.50444500 0.88048600  
H 4.44777600 -1.50515200 3.55023300  
H 6.78523600 -1.05998600 2.78560200  
C 2.97167500 2.38573100 -1.23119600  
C 3.66467200 3.60116500 -1.08539100  
C 2.78709700 1.85853600 -2.52098000  
C 4.16502500 4.26910700 -2.20672100  
H 3.81552700 4.03258300 -0.09294600  
C 3.29320700 2.52561200 -3.64202500  
H 2.23549300 0.92243300 -2.64761700  
C 3.98175300 3.73247500 -3.48662600  
H 4.70039000 5.21405900 -2.07982500  
H 3.14162100 2.10326000 -4.63900000

H 4.37245400 4.25816300 -4.36217900  
C -0.47508400 -3.44696700 -0.84442500  
C -0.52392200 -3.65870100 -2.23534800  
C -1.42734600 -4.08033500 -0.03010300  
C -1.49666400 -4.48982900 -2.79432600  
H 0.20180900 -3.16941900 -2.89108900  
C -2.40975500 -4.90386800 -0.59467700  
H -1.41344400 -3.93581200 1.05193000  
C -2.44705400 -5.11246200 -1.97546300  
H -1.51635600 -4.64809100 -3.87611600  
H -3.14610100 -5.38599300 0.05402500  
H -3.21258700 -5.75783600 -2.41446700  
C 0.81198600 -2.63801200 1.63689300  
C 1.65357600 -3.59755600 2.22333700  
C -0.05978500 -1.90475100 2.46362800  
C 1.61697000 -3.82259900 3.60409800  
H 2.35033600 -4.17333600 1.61235500  
C -0.10211300 -2.13847100 3.84109300  
H -0.70599900 -1.13918900 2.02485200  
C 0.73861200 -3.09794000 4.41563200  
H 2.28189200 -4.57002600 4.04549100  
H -0.78807000 -1.56181600 4.46745400  
H 0.71289100 -3.27648600 5.49399700  
C 2.35012600 -2.97537100 -0.86416900  
C 2.54761600 -4.36578000 -0.97229900  
C 3.36260000 -2.11253600 -1.31178600  
C 3.73834600 -4.87376200 -1.49807100  
H 1.76817700 -5.06025700 -0.65120000  
C 4.55385900 -2.62235600 -1.83991700  
H 3.21502600 -1.03332300 -1.25616200  
C 4.74530400 -4.00341800 -1.93157200  
H 3.87799500 -5.95559600 -1.57347900  
H 5.33006800 -1.93441300 -2.18534900  
H 5.67430200 -4.40343900 -2.34686900  
Pd 0.38813500 0.02779600 -0.50997200  
C -1.52416700 0.07227200 -1.24453000  
C -1.45999000 1.35962100 -1.27170300  
C -2.58948400 -0.89348200 -1.63899500  
H -2.30498000 -1.38926700 -2.58352200  
H -2.70207500 -1.69547500 -0.89998700  
N -3.88164200 -0.21935100 -1.82779300  
C -3.89478800 1.01611700 -2.59689700  
H -3.40336400 0.84031900 -3.56865800  
H -4.94078000 1.28585400 -2.81220800  
C -3.24671900 2.23691000 -1.94527100  
O -2.95968200 3.21512300 -2.67703700

H -3.52189400 2.40125800 -0.88101400  
S -5.19342500 -0.68026400 -0.90663200  
O -6.38671100 -0.14923000 -1.58605700  
O -5.06050900 -2.13117900 -0.69358900  
C -5.10078000 0.10279800 0.70201300  
C -5.70366900 1.35259000 0.89514300  
C -4.42193800 -0.53693200 1.74330000  
C -5.60811300 1.96495300 2.14334500  
H -6.25065600 1.83503900 0.08314400  
C -4.33594600 0.09476700 2.98655700  
H -3.97582900 -1.52178200 1.59432600  
C -4.92133700 1.35209000 3.20856600  
H -6.08200300 2.93863100 2.29695700  
H -3.80817200 -0.40625200 3.80247200  
H -0.85038300 2.23625000 -1.06824800  
C -4.83628500 2.03023800 4.55009600  
H -5.84033800 2.15972000 4.98908000  
H -4.22549900 1.45284000 5.25925900  
H -4.39807300 3.03788700 4.45645200  
C -0.53272300 5.42936700 -2.61040900  
H 0.30084900 6.04273600 -2.23011300  
H -1.11045500 6.05531600 -3.31983000  
H -0.09486300 4.58946700 -3.18444900  
O -1.31259400 4.99397300 -1.51606400  
H -2.01643800 4.40122300 -1.88138300

**TS-endo-PhB(OH)2**

P 2.77641600 -1.21416100 -0.80094300  
P 1.40454500 2.27838400 0.65359500  
C 0.34685100 2.69551300 2.12414900  
C -1.03413900 2.87852800 1.91795000  
C 0.84291900 2.74348500 3.43707100  
C -1.89507400 3.09523100 2.99586300  
H -1.44786300 2.85890500 0.90708600  
C -0.02239400 2.96309200 4.51651700  
H 1.90855500 2.61082600 3.63264000  
C -1.39216600 3.13617200 4.30193000  
H -2.96474800 3.22030900 2.80855300  
H 0.38340300 2.99891000 5.53140100  
H -2.06583800 3.30334600 5.14673000  
C 3.12239800 2.63143400 1.25399000  
C 3.81155800 3.82678200 0.98926400  
C 3.77450600 1.62369700 1.98860500  
C 5.11841800 4.01091800 1.45499300  
H 3.33804000 4.62314900 0.41279000  
C 5.07449600 1.81528800 2.46541500  
H 3.26409400 0.67848100 2.18935100



|   |            |             |             |    |             |             |             |
|---|------------|-------------|-------------|----|-------------|-------------|-------------|
| C | 5.75181500 | 3.00964000  | 2.19692600  | H  | 5.30425100  | 2.68078800  | -2.61552200 |
| H | 5.64186900 | 4.94546000  | 1.23489500  | H  | 7.08098700  | 1.29766000  | -3.69787700 |
| H | 5.56228700 | 1.02303200  | 3.03935200  | Pd | 0.86262500  | 0.05763400  | -0.25254800 |
| H | 6.77249000 | 3.15656200  | 2.56041100  | C  | -0.70291300 | -1.22020400 | -0.59301700 |
| C | 1.02597600 | 3.65039500  | -0.52642600 | C  | -1.42372700 | -0.26635900 | -0.12667500 |
| C | 0.77338500 | 4.97008500  | -0.10852100 | C  | -0.95383900 | -2.54892700 | -1.21432100 |
| C | 0.97781500 | 3.35146900  | -1.89891100 | H  | -0.60309400 | -2.54851000 | -2.25967000 |
| C | 0.48993300 | 5.96722900  | -1.04592000 | H  | -0.38527800 | -3.33910400 | -0.70608300 |
| H | 0.79300700 | 5.22411600  | 0.95392300  | N  | -2.38237200 | -2.88926000 | -1.20941700 |
| C | 0.69825900 | 4.35189000  | -2.83646900 | C  | -3.27831700 | -1.86682500 | -1.71821500 |
| H | 1.15054600 | 2.32491300  | -2.23399200 | H  | -2.93237000 | -1.56117300 | -2.71896600 |
| C | 0.45397700 | 5.66104000  | -2.41138200 | H  | -4.28446900 | -2.30001600 | -1.84724400 |
| H | 0.29417400 | 6.98848400  | -0.70777100 | C  | -3.45749400 | -0.62118900 | -0.87453600 |
| H | 0.66367300 | 4.10364700  | -3.90066800 | O  | -3.80688400 | 0.42739700  | -1.49475400 |
| H | 0.22972900 | 6.44282500  | -3.14220200 | H  | -3.74840600 | -0.72906200 | 0.17988600  |
| C | 2.47003200 | -2.70459900 | -1.86327600 | S  | -2.95899400 | -4.11766400 | -0.22847200 |
| C | 2.05499600 | -2.48639900 | -3.19106500 | O  | -4.28793800 | -4.46629000 | -0.75530100 |
| C | 2.59237300 | -4.02342200 | -1.40030000 | O  | -1.89516200 | -5.13268200 | -0.18894100 |
| C | 1.77811800 | -3.56284100 | -4.03584100 | C  | -3.18424900 | -3.50454100 | 1.43823200  |
| H | 1.94586700 | -1.46580900 | -3.57017800 | C  | -4.44054200 | -3.03705800 | 1.83536900  |
| C | 2.30415800 | -5.10205500 | -2.24708100 | C  | -2.09637500 | -3.48969400 | 2.32078400  |
| H | 2.91442200 | -4.22271900 | -0.37633700 | C  | -4.59893200 | -2.53288500 | 3.12819400  |
| C | 1.89875300 | -4.87664100 | -3.56462800 | H  | -5.28843300 | -3.07501900 | 1.14929200  |
| H | 1.46220000 | -3.37589900 | -5.06588300 | C  | -2.27527000 | -2.98136600 | 3.60606200  |
| H | 2.40325400 | -6.12375900 | -1.87019500 | H  | -1.12537500 | -3.88279300 | 2.01443200  |
| H | 1.67690800 | -5.71979300 | -4.22433700 | C  | -3.52366700 | -2.48860900 | 4.03112800  |
| C | 3.54081500 | -1.91408100 | 0.73463200  | H  | -5.58198300 | -2.17175900 | 3.44196100  |
| C | 4.92605300 | -1.99192100 | 0.95338200  | H  | -1.42850600 | -2.97247600 | 4.29810300  |
| C | 2.66953000 | -2.36190100 | 1.74610700  | H  | -1.71742800 | 0.59066800  | 0.46007300  |
| C | 5.42666100 | -2.51472400 | 2.15159300  | C  | -3.68918800 | -1.92708700 | 5.41799300  |
| H | 5.62785000 | -1.64076200 | 0.19529700  | H  | -3.28946600 | -2.61839400 | 6.17781800  |
| C | 3.17148000 | -2.89440100 | 2.93650200  | H  | -3.13180100 | -0.98010500 | 5.52319400  |
| H | 1.58805500 | -2.28767600 | 1.60215000  | H  | -4.74474400 | -1.72553400 | 5.65165500  |
| C | 4.55347500 | -2.97035100 | 3.14354300  | C  | -5.74822400 | 2.12197400  | -1.43343300 |
| H | 6.50785800 | -2.56408700 | 2.30721000  | C  | -6.74322900 | 1.13225400  | -1.57106700 |
| H | 2.47985700 | -3.24266800 | 3.70835100  | C  | -6.07351600 | 3.41728400  | -1.88064300 |
| H | 4.94775400 | -3.37853900 | 4.07806100  | C  | -7.99796400 | 1.41739800  | -2.12126200 |
| C | 4.17524900 | -0.42477400 | -1.72754700 | H  | -6.53516500 | 0.10785900  | -1.24306100 |
| C | 5.17490700 | -1.19663400 | -2.35130000 | C  | -7.32473400 | 3.71651200  | -2.43444400 |
| C | 4.23554600 | 0.97274500  | -1.83702800 | H  | -5.32856100 | 4.21500400  | -1.79259900 |
| C | 6.21477700 | -0.57910900 | -3.05088700 | C  | -8.29347000 | 2.71481000  | -2.55679700 |
| H | 5.14360100 | -2.28718400 | -2.29623500 | H  | -8.74775500 | 0.62568200  | -2.21494600 |
| C | 5.27633900 | 1.59055400  | -2.53953900 | H  | -7.54450100 | 4.73410600  | -2.77207200 |
| H | 3.45878100 | 1.58497500  | -1.37853900 | H  | -9.27209600 | 2.94227800  | -2.98963300 |
| C | 6.26889300 | 0.81654100  | -3.14598600 | B  | -4.31486800 | 1.81601900  | -0.73912500 |
| H | 6.98457300 | -1.19200300 | -3.52776200 | O  | -3.26275900 | 2.75940700  | -0.99713700 |

H -3.21346100 2.99433400 -1.93321600  
O -4.34776700 1.55531600 0.67227100  
H -5.21321000 1.23598000 0.95767400

**TS-proton**

P 2.30800800 -0.41651100 -0.16957800  
C 1.62710000 -1.52510200 1.13745100  
C 0.40060600 -2.17589100 0.91049900  
C 2.27938300 -1.70742400 2.36839500  
C -0.15580600 -2.99863200 1.89267400  
H -0.13053900 -2.04779300 -0.03443600  
C 1.71841100 -2.53343300 3.34887800  
H 3.23123900 -1.21317700 2.57053000  
C 0.50235600 -3.18149100 3.11405700  
H -1.11697300 -3.48339300 1.70497000  
H 2.24049800 -2.67129500 4.29952700  
H 0.06645500 -3.82702100 3.88127800  
C 4.07751700 -0.18223900 0.28697400  
C 5.09987300 -1.02366300 -0.17828300  
C 4.40182700 0.88183800 1.14791100  
C 6.42440400 -0.80622500 0.21701400  
H 4.87457300 -1.84970800 -0.85525000  
C 5.72446100 1.09063700 1.54650900  
H 3.61570500 1.55315800 1.50447700  
C 6.73917700 0.24720600 1.08025500  
H 7.21297000 -1.46517400 -0.15610400  
H 5.96357400 1.91981100 2.21764600  
H 7.77543000 0.41497200 1.38589000  
C 2.27135400 -1.44672800 -1.69519400  
C 2.49987800 -2.83460700 -1.64850600  
C 2.01093200 -0.83464000 -2.93348400  
C 2.47461300 -3.59182400 -2.82292400  
H 2.69358400 -3.33211000 -0.69572500  
C 1.98588600 -1.59783700 -4.10494800  
H 1.83471100 0.24161700 -2.97834800  
C 2.21739600 -2.97562700 -4.05242300  
H 2.65362000 -4.66925600 -2.77494400  
H 1.78014500 -1.11095100 -5.06192000  
H 2.19401900 -3.57140100 -4.96890700  
Pd 1.32279700 1.64116500 -0.47082900  
C -0.58742600 1.39365000 0.63864100  
C -0.52494300 1.43965900 1.98975400  
C -1.69383800 0.63025900 -0.05928800  
H -2.36304200 1.35474000 -0.56796400  
H -1.27350200 -0.01547000 -0.84146600  
N -2.44461200 -0.20942800 0.88635000  
C -2.79904600 0.42010700 2.15681100

H -3.37362700 1.35285100 1.99967000  
H -3.40616300 -0.26835800 2.75649600  
C -1.51057500 0.76040200 2.90848400  
O -1.87548600 1.59510100 3.99777900  
H -1.05608800 -0.18091600 3.27658900  
S -3.43652700 -1.40618700 0.27799700  
O -2.72387700 -1.98804200 -0.87313400  
O -3.79969300 -2.27167200 1.41358600  
C -4.93655800 -0.65024300 -0.33588800  
C -4.98649400 -0.19295400 -1.65988000  
C -6.03183600 -0.49740600 0.52048800  
C -6.14643700 0.42998600 -2.11692800  
H -4.13562700 -0.33554200 -2.32844300  
C -7.18438600 0.12966300 0.04209300  
H -5.99415400 -0.87512700 1.54375000  
C -7.26249700 0.60557800 -1.27724800  
H -6.18963200 0.78296500 -3.15114700  
H -8.04299700 0.24498500 0.70894300  
H 0.27020000 2.00827000 2.48653600  
C -8.50347200 1.28415200 -1.79323600  
H -8.89647500 0.76479700 -2.68333700  
H -9.29731300 1.31304300 -1.03275500  
H -8.28502700 2.32096600 -2.10085300  
H -1.11431400 1.67182800 4.59286800  
O 0.24657400 3.50387700 -0.66033100  
C 0.59468400 4.55711500 0.21487100  
H 1.65262600 4.85853900 0.10944500  
H -0.02869000 5.44602700 -0.00332700  
H -0.30371300 2.52331300 0.05047000  
H 0.42278100 4.28964900 1.27649600  
O 2.92893100 2.00112100 -1.66534800  
C 3.34949800 3.33115100 -1.69546100  
H 3.79769700 3.68009800 -0.73807000  
H 4.14086100 3.44760600 -2.46732300  
H 2.54729300 4.05082200 -1.96467400

**TS-β-H**

P -2.42658000 -0.21309100 -0.23387900  
C -1.77572500 0.53595300 -1.78604700  
C -0.45848400 0.23532800 -2.18121000  
C -2.52925900 1.43591200 -2.55703100  
C 0.08466000 0.81170200 -3.33162100  
H 0.15181700 -0.45638600 -1.59619200  
C -1.97902700 2.01579500 -3.70632300  
H -3.55122600 1.68962700 -2.26924300  
C -0.67425700 1.70454100 -4.09753600  
H 1.11091300 0.57023400 -3.61825900

H -2.57891000 2.71290400 -4.29765300  
H -0.24653200 2.15798400 -4.99579000  
C -4.20988200 0.25828800 -0.19737000  
C -5.19969500 -0.46831500 -0.88027200  
C -4.58119300 1.39463800 0.54282800  
C -6.53604700 -0.06022500 -0.82628600  
H -4.93375400 -1.35709800 -1.45684400  
C -5.91725800 1.80405600 0.58885400  
H -3.82053700 1.96022500 1.08887200  
C -6.89697500 1.07610800 -0.09433600  
H -7.29865800 -0.63478300 -1.35899700  
H -6.19323500 2.69051900 1.16617100  
H -7.94298800 1.39170800 -0.05282400  
C -2.42472500 -2.03167200 -0.54955700  
C -2.37321900 -2.58468000 -1.84052100  
C -2.49553800 -2.89161000 0.56213100  
C -2.39005000 -3.97275200 -2.01405100  
H -2.31893300 -1.93705200 -2.71792400  
C -2.51821200 -4.27747700 0.38317700  
H -2.54044000 -2.47289500 1.57100700  
C -2.46225800 -4.82106700 -0.90481900  
H -2.34698200 -4.39087400 -3.02338900  
H -2.57396800 -4.93469600 1.25513800  
H -2.47288100 -5.90550800 -1.04385900  
Pd -1.40844000 0.31166900 1.89896900  
C 0.30354600 1.11144700 1.19549700  
C 0.41372600 2.34521400 0.67136200  
C 1.52437200 0.22731700 1.34826700  
H 1.78591200 0.14557300 2.42022300  
H 1.32128600 -0.79365400 1.00226000  
N 2.70264200 0.74024900 0.62521500  
C 2.91573500 2.18194900 0.73419700  
H 3.03714600 2.42730600 1.80321800  
H 3.84286300 2.47605400 0.22285300  
C 1.71561400 2.96091100 0.19409600  
O 1.87128900 4.30140400 0.66046000  
H 1.74925600 2.95106300 -0.91359800  
S 3.30436000 -0.04589400 -0.71300500  
O 2.57801100 -1.32517800 -0.83481800  
O 3.32567600 0.86851600 -1.87378500  
C 5.00671400 -0.41972600 -0.30915100  
C 5.27627000 -1.41592100 0.63973700  
C 6.04083100 0.26606900 -0.94796500  
C 6.60040500 -1.71172400 0.95001900  
H 4.46269800 -1.95742700 1.12740900  
C 7.36456200 -0.04525000 -0.62130000

H 5.81758300 1.02893500 -1.69533600  
C 7.66767800 -1.03226700 0.32855100  
H 6.81456900 -2.48953500 1.68847600  
H 8.17596800 0.49099000 -1.12063500  
H -0.46857500 2.98582800 0.54401000  
C 9.09138700 -1.36921900 0.68379600  
H 9.28157400 -1.19293500 1.75616300  
H 9.30342400 -2.43510700 0.49483200  
H 9.80794400 -0.76823300 0.10530900  
H 1.17180100 4.84110200 0.26291200  
O -3.07218600 -0.51929000 3.10912200  
C -2.25685600 -0.17402700 4.01561900  
H -2.41475200 0.76256400 4.58375900  
H -1.60528500 -0.92668500 4.49994400  
H -0.71176800 0.64297400 3.31095300

#### TS-1

P -1.45098700 0.00895000 -0.05433800  
C -2.31914300 1.55545500 -0.53687000  
C -3.38205700 2.09699100 0.20392200  
C -1.85900900 2.24219500 -1.67717300  
C -3.98448800 3.29414800 -0.19907200  
H -3.74764400 1.59265300 1.10002400  
C -2.46968000 3.43147400 -2.08071300  
H -1.01855500 1.84627300 -2.25339600  
C -3.53393500 3.96074000 -1.34164200  
H -4.81092800 3.70490100 0.38701600  
H -2.10658200 3.95103200 -2.97138800  
H -4.00715700 4.89545600 -1.65426600  
C -1.99145200 -1.27706600 -1.26435900  
C -2.68477000 -0.97362600 -2.44740400  
C -1.65268700 -2.61815600 -0.99604000  
C -3.03230000 -1.99106400 -3.34338000  
H -2.96682100 0.05483400 -2.67795900  
C -2.00412000 -3.62956000 -1.89288800  
H -1.11726700 -2.87843500 -0.08038500  
C -2.69328800 -3.31894800 -3.07072200  
H -3.57624300 -1.73915500 -4.25774600  
H -1.73816400 -4.66605200 -1.66869000  
H -2.96735700 -4.11170600 -3.77187400  
C -2.19169100 -0.55258800 1.53297900  
C -3.49483800 -1.08024100 1.59196500  
C -1.43185500 -0.46438300 2.71125600  
C -4.02793900 -1.50077200 2.81283800  
H -4.09662200 -1.16626000 0.68401100  
C -1.96915000 -0.88789900 3.93161000  
H -0.41281800 -0.07092500 2.67192700

|             |             |             |             |    |             |             |             |
|-------------|-------------|-------------|-------------|----|-------------|-------------|-------------|
| C           | -3.26676500 | -1.40478700 | 3.98384500  | C  | -1.28377500 | 2.61101500  | -1.24614700 |
| H           | -5.04177800 | -1.90824300 | 2.84918400  | C  | -1.13085100 | 4.33549600  | 0.94628800  |
| H           | -1.36801000 | -0.81760500 | 4.84189600  | H  | -2.05256000 | 2.75112400  | 2.08153800  |
| H           | -3.68550700 | -1.73879400 | 4.93699200  | C  | -0.74100300 | 3.88831200  | -1.39865900 |
| Pd          | 0.90531800  | 0.20018500  | 0.04721500  | H  | -1.33104800 | 1.94119500  | -2.10978500 |
| C           | 3.09719700  | 0.30270800  | 0.00058500  | C  | -0.66224300 | 4.75489100  | -0.30099900 |
| C           | 3.53616800  | 0.69087700  | -1.28744400 | H  | -1.07286800 | 5.00508100  | 1.80870300  |
| C           | 3.75497200  | 0.89210100  | 1.10312200  | H  | -0.37606000 | 4.20800700  | -2.37820600 |
| C           | 4.57147300  | 1.61385100  | -1.46749500 | H  | -0.23529400 | 5.75427800  | -0.42042600 |
| H           | 3.06479500  | 0.25346000  | -2.17413000 | C  | -3.95750800 | 0.56875300  | -0.95093400 |
| C           | 4.79360200  | 1.81341400  | 0.93734800  | C  | -4.65232800 | 1.77584500  | -1.15361900 |
| H           | 3.45760700  | 0.61396700  | 2.11893000  | C  | -4.41239600 | -0.60230800 | -1.58225500 |
| C           | 5.20013600  | 2.18072100  | -0.35151500 | C  | -5.78537300 | 1.80689600  | -1.97153500 |
| H           | 4.88959200  | 1.89378300  | -2.47623500 | H  | -4.31312100 | 2.69742500  | -0.67579500 |
| H           | 5.28762800  | 2.24803000  | 1.81154500  | C  | -5.54777600 | -0.56316700 | -2.39917500 |
| H           | 6.00993600  | 2.90379700  | -0.48623300 | H  | -3.86231800 | -1.53700400 | -1.42806800 |
| B           | 2.76149900  | -1.69338000 | 0.21948800  | C  | -6.23524000 | 0.63821200  | -2.59618500 |
| O           | 3.00288400  | -1.97177100 | 1.57310400  | H  | -6.31744000 | 2.75016800  | -2.12235300 |
| H           | 2.35297500  | -1.56142600 | 2.16013400  | H  | -5.89261800 | -1.47845200 | -2.88830800 |
| O           | 1.36096000  | -1.82453700 | -0.19149400 | H  | -7.11978500 | 0.66643900  | -3.23853000 |
| H           | 1.28131600  | -2.06254200 | -1.13058300 | Pd | -0.87354100 | -1.30720500 | -0.31996800 |
| O           | 3.61894300  | -2.29828800 | -0.70962000 | O  | -2.38170400 | -2.74386700 | -0.53312900 |
| C           | 5.00470100  | -2.38950600 | -0.45690900 | C  | -3.06394500 | -3.12906800 | 0.61706100  |
| H           | 5.22006100  | -2.88836200 | 0.50437500  | H  | -3.67705600 | -4.03827200 | 0.42333200  |
| H           | 5.46876600  | -2.97963300 | -1.26329700 | H  | -2.39858500 | -3.39042200 | 1.47214700  |
| H           | 5.48449300  | -1.39342000 | -0.44212300 | H  | -3.77318400 | -2.36010700 | 1.00167800  |
| O           | 0.80284400  | 2.18889900  | 0.25746600  | C  | 0.44632400  | -2.82086700 | -0.91748400 |
| C           | 0.51211400  | 2.66395200  | 1.53879600  | C  | 0.85239600  | -2.77777300 | -2.26076000 |
| H           | 1.22542300  | 2.31637300  | 2.31737900  | C  | 0.52575400  | -4.03356100 | -0.21176800 |
| H           | 0.56933600  | 3.77318300  | 1.53607700  | C  | 1.28455400  | -3.94509700 | -2.90564200 |
| H           | -0.51001000 | 2.40441800  | 1.89107800  | H  | 0.83634200  | -1.83307500 | -2.81154400 |
| <b>TS-2</b> |             |             |             | C  | 0.97119600  | -5.19300000 | -0.85443000 |
| P           | -2.46265000 | 0.47748200  | 0.12851900  | H  | 0.22630500  | -4.08234800 | 0.83885300  |
| C           | -3.09592600 | 0.35836600  | 1.85724700  | C  | 1.34748000  | -5.15299800 | -2.20359200 |
| C           | -4.42309000 | 0.65465300  | 2.20882900  | H  | 1.58318000  | -3.90385600 | -3.95719600 |
| C           | -2.19900000 | -0.05685200 | 2.85862700  | H  | 1.02131900  | -6.13441400 | -0.29943900 |
| C           | -4.84258800 | 0.54008600  | 3.53847400  | H  | 1.69607600  | -6.06117600 | -2.70295900 |
| H           | -5.13871700 | 0.97325600  | 1.44837200  | C  | 1.35918500  | -1.10258200 | 0.06393600  |
| C           | -2.61920200 | -0.16090900 | 4.18742100  | C  | 0.72418700  | -0.02218600 | -0.12755600 |
| H           | -1.16557200 | -0.30076600 | 2.59722300  | H  | 0.75133000  | 1.06252800  | -0.11625900 |
| C           | -3.94339400 | 0.13438100  | 4.52955600  | C  | 2.57037300  | -1.80108400 | 0.59848700  |
| H           | -5.87949800 | 0.76941700  | 3.79853000  | H  | 2.26058600  | -2.55037100 | 1.34321000  |
| H           | -1.91136700 | -0.48194500 | 4.95626900  | H  | 3.09175800  | -2.35026800 | -0.19598100 |
| H           | -4.27490300 | 0.04450900  | 5.56753700  | N  | 3.51893900  | -0.89300500 | 1.23932200  |
| C           | -1.76933300 | 2.18577800  | 0.00506400  | C  | 3.13019900  | -0.16020200 | 2.43933500  |
| C           | -1.68423300 | 3.05798200  | 1.10074500  | H  | 2.87194200  | 0.89770000  | 2.25786900  |

|             |             |             |             |   |             |             |             |
|-------------|-------------|-------------|-------------|---|-------------|-------------|-------------|
| H           | 2.21967800  | -0.64324600 | 2.83443000  | S | 4.29686700  | 0.42515300  | -0.91192700 |
| C           | 4.15667300  | -0.24769200 | 3.55032100  | O | 3.31994600  | -0.66685200 | -1.07315400 |
| O           | 4.27685000  | 0.60478200  | 4.40078800  | O | 4.45874500  | 1.40128400  | -2.00753200 |
| H           | 4.75754100  | -1.18810100 | 3.56771800  | C | 5.90551300  | -0.26650400 | -0.56718900 |
| S           | 4.81273400  | -0.28108400 | 0.35533200  | C | 6.02811900  | -1.26256600 | 0.41140900  |
| O           | 5.74881700  | 0.22727600  | 1.37382800  | C | 7.00870700  | 0.16369900  | -1.30703900 |
| O           | 5.23068200  | -1.34453600 | -0.56841200 | C | 7.28055800  | -1.82204800 | 0.64650400  |
| C           | 4.26646700  | 1.11428500  | -0.61500600 | H | 5.16026700  | -1.59711900 | 0.98281400  |
| C           | 4.27082200  | 2.39334700  | -0.04417600 | C | 8.25660300  | -0.41355500 | -1.05671000 |
| C           | 3.84246900  | 0.91065500  | -1.93317900 | H | 6.89507500  | 0.93715800  | -2.06797100 |
| C           | 3.83360400  | 3.47466400  | -0.80911300 | C | 8.41520100  | -1.41049300 | -0.08178600 |
| H           | 4.62566900  | 2.54616600  | 0.97642600  | H | 7.38375300  | -2.59814500 | 1.41003300  |
| C           | 3.41369200  | 2.00698700  | -2.68129900 | H | 9.12292800  | -0.07927400 | -1.63350300 |
| H           | 3.85571100  | -0.08797900 | -2.37319500 | C | 9.75771600  | -2.03399200 | 0.18953500  |
| C           | 3.40145800  | 3.30369600  | -2.13669600 | H | 10.04978600 | -1.89602900 | 1.24422400  |
| H           | 3.83744900  | 4.47487700  | -0.36755000 | H | 9.72920200  | -3.12169900 | 0.00754000  |
| H           | 3.08671200  | 1.85233400  | -3.71303300 | H | 10.54336900 | -1.59974500 | -0.44546500 |
| C           | 2.97440400  | 4.48638600  | -2.96379100 | P | -0.83408900 | -2.27773400 | 0.24999500  |
| H           | 2.30245300  | 4.18788300  | -3.78218100 | P | -3.07515900 | 0.94417000  | -0.25220400 |
| H           | 2.47044700  | 5.24786500  | -2.34928000 | C | -3.52550200 | 1.39530500  | -1.98374900 |
| H           | 3.85445000  | 4.97185400  | -3.42251100 | C | -2.49772300 | 1.66430000  | -2.90404000 |
| <b>TS-3</b> |             |             |             | C | -4.86362600 | 1.49423500  | -2.40659700 |
| C           | 1.12555800  | 3.17301500  | 0.64431100  | C | -2.80005200 | 2.03457100  | -4.21794000 |
| C           | 1.50929800  | 3.75928200  | 1.86843300  | H | -1.45391100 | 1.57787100  | -2.59142200 |
| C           | 0.46405300  | 3.98852300  | -0.30334500 | C | -5.16223600 | 1.86119600  | -3.72220700 |
| C           | 1.24631100  | 5.10690200  | 2.13149100  | H | -5.67944800 | 1.28611200  | -1.71121500 |
| H           | 2.00626500  | 3.16533500  | 2.63598600  | C | -4.13276500 | 2.13253600  | -4.62977100 |
| C           | 0.21162700  | 5.33217100  | -0.04141400 | H | -1.98983500 | 2.23924900  | -4.92273700 |
| H           | 0.15467100  | 3.56212300  | -1.26017100 | H | -6.20624800 | 1.93481000  | -4.03835100 |
| C           | 0.60044100  | 5.89987200  | 1.18003200  | H | -4.36978700 | 2.41576400  | -5.65882200 |
| H           | 1.54973700  | 5.53624000  | 3.08992200  | C | -4.51653600 | -0.04827200 | 0.33422000  |
| H           | -0.29153600 | 5.94406300  | -0.79464100 | C | -5.28920100 | 0.32884800  | 1.44445700  |
| H           | 0.39905200  | 6.95436700  | 1.38564000  | C | -4.81530500 | -1.25318100 | -0.32973900 |
| C           | 1.40775000  | 1.74907200  | 0.33819500  | C | -6.34401700 | -0.48248700 | 1.87894600  |
| C           | 0.75272800  | 1.07814200  | -0.65348300 | H | -5.07648200 | 1.25760300  | 1.97724200  |
| H           | 0.78338100  | 0.98347900  | -1.74781600 | C | -5.87304300 | -2.05559300 | 0.10311500  |
| C           | 2.53574500  | 1.00449500  | 1.07594400  | H | -4.22582100 | -1.56438800 | -1.19553800 |
| H           | 2.59521800  | 1.30437200  | 2.13039600  | C | -6.63919500 | -1.67385000 | 1.21093800  |
| H           | 2.33295200  | -0.07077200 | 1.05626300  | H | -6.93877700 | -0.17539700 | 2.74347400  |
| N           | 3.86691800  | 1.23722000  | 0.49550800  | H | -6.09693100 | -2.98547300 | -0.42631400 |
| C           | 4.68341800  | 2.39644300  | 0.83493600  | H | -7.46465400 | -2.30479500 | 1.55122100  |
| H           | 4.39649100  | 2.72561100  | 1.84753900  | C | -3.17327600 | 2.51690600  | 0.70719300  |
| H           | 5.75125100  | 2.12502800  | 0.89567900  | C | -3.92258200 | 3.62614400  | 0.28036600  |
| C           | 4.55570200  | 3.60623000  | -0.07860300 | C | -2.46250400 | 2.59591200  | 1.91835400  |
| O           | 5.40928500  | 4.46374100  | -0.12371300 | C | -3.96161000 | 4.78978600  | 1.05511800  |
| H           | 3.62280600  | 3.67915800  | -0.68359100 | H | -4.47901900 | 3.59074300  | -0.65834300 |

|             |             |             |             |   |             |             |             |
|-------------|-------------|-------------|-------------|---|-------------|-------------|-------------|
| C           | -2.51174300 | 3.75704700  | 2.69495500  | C | 2.67234700  | 5.49810200  | -1.69914900 |
| H           | -1.86408400 | 1.74480300  | 2.25515100  | H | 0.99255000  | 4.21656800  | -1.29987700 |
| C           | -3.25959300 | 4.85747000  | 2.26299100  | C | 4.06446800  | 5.60016800  | -1.80462100 |
| H           | -4.54510800 | 5.64787700  | 0.71076000  | H | 5.94406300  | 4.53392100  | -1.68018000 |
| H           | -1.95668800 | 3.80411900  | 3.63536400  | H | 2.04458800  | 6.38064200  | -1.84833200 |
| H           | -3.29167100 | 5.76916300  | 2.86551200  | H | 4.52969600  | 6.56019500  | -2.04376100 |
| C           | 0.83437400  | -3.07284200 | 0.28285000  | C | 2.22106600  | 1.81935600  | -0.86062000 |
| C           | 1.62832400  | -2.92512300 | 1.43583500  | C | 0.97776800  | 1.49732500  | -1.32297400 |
| C           | 1.35032400  | -3.78005700 | -0.81449000 | H | 0.51666500  | 2.20267000  | -2.02387600 |
| C           | 2.90389000  | -3.49049000 | 1.49286000  | C | 3.04282700  | 0.75345400  | -0.16260700 |
| H           | 1.24701300  | -2.37672400 | 2.30127400  | H | 3.88577900  | 1.18334000  | 0.38640100  |
| C           | 2.63412100  | -4.33463000 | -0.75686200 | H | 2.41565500  | 0.18756600  | 0.54329600  |
| H           | 0.75556200  | -3.90806100 | -1.72090400 | N | 3.54848500  | -0.14720600 | -1.21894400 |
| C           | 3.41165000  | -4.19651000 | 0.39549300  | C | 2.50319600  | -0.98088600 | -1.79273800 |
| H           | 3.50298400  | -3.38053400 | 2.40077500  | H | 2.94103900  | -1.61282200 | -2.58263400 |
| H           | 3.02169500  | -4.88437200 | -1.61878900 | H | 2.02983200  | -1.63288500 | -1.03633800 |
| H           | 4.41126400  | -4.63647000 | 0.44039100  | C | 1.40306700  | -0.19456200 | -2.49042900 |
| C           | -1.72322600 | -3.11853200 | -1.13095800 | O | 0.24397200  | -0.74092600 | -2.53956800 |
| C           | -2.51636100 | -4.26491800 | -0.95968900 | H | 1.72709400  | 0.43231100  | -3.34148400 |
| C           | -1.59778000 | -2.55947400 | -2.41635400 | S | 5.06726700  | -0.85448300 | -1.01284200 |
| C           | -3.16410300 | -4.84357000 | -2.05637400 | O | 5.37291800  | -1.52553200 | -2.28410100 |
| H           | -2.64340300 | -4.71111900 | 0.02783600  | O | 5.94918400  | 0.21575300  | -0.51981800 |
| C           | -2.23788500 | -3.14643900 | -3.51130700 | C | 4.94730000  | -2.10026200 | 0.26260400  |
| H           | -0.99842500 | -1.65589200 | -2.56084300 | C | 4.64630500  | -3.41929000 | -0.09261700 |
| C           | -3.02468100 | -4.28944100 | -3.33275700 | C | 5.14087700  | -1.73775300 | 1.60270200  |
| H           | -3.78201700 | -5.73331800 | -1.90865400 | C | 4.52975400  | -4.38120400 | 0.91292900  |
| H           | -2.12772800 | -2.70353800 | -4.50463900 | H | 4.51917200  | -3.69732800 | -1.14028800 |
| H           | -3.53264000 | -4.74487800 | -4.18705000 | C | 5.01966800  | -2.71376700 | 2.58994000  |
| C           | -1.59353700 | -2.85679400 | 1.82561200  | H | 5.39760400  | -0.71117000 | 1.86982200  |
| C           | -1.42206500 | -4.17551100 | 2.28890500  | C | 4.71161900  | -4.04875100 | 2.26563300  |
| C           | -2.34200700 | -1.95374800 | 2.59749600  | H | 4.29908500  | -5.41369200 | 0.63755400  |
| C           | -2.00693100 | -4.58112600 | 3.49097100  | H | 5.17591600  | -2.43572900 | 3.63600400  |
| H           | -0.82549100 | -4.88953100 | 1.71671800  | P | -2.29055600 | -1.55698000 | -0.71441600 |
| C           | -2.92417900 | -2.36277100 | 3.80214000  | P | -1.16676400 | 1.57380000  | 0.96626500  |
| H           | -2.46503100 | -0.92337000 | 2.25915700  | C | -1.86454200 | 3.14565900  | 0.30086000  |
| C           | -2.76015800 | -3.67667700 | 4.24878400  | C | -2.00072000 | 3.34122000  | -1.08236900 |
| H           | -1.86944700 | -5.60821400 | 3.83945400  | C | -2.32825500 | 4.14231000  | 1.18200400  |
| H           | -3.50316200 | -1.64840700 | 4.39310200  | C | -2.56941400 | 4.51998900  | -1.57901100 |
| H           | -3.21303800 | -3.99647500 | 5.19113500  | H | -1.67663300 | 2.56538000  | -1.77746500 |
| Pd          | -0.77986000 | 0.10431100  | -0.14624200 | C | -2.88964500 | 5.31893200  | 0.68260000  |
| <b>TS-4</b> |             |             |             | H | -2.25879000 | 4.00093800  | 2.26290100  |
| C           | 2.86302900  | 3.11810900  | -1.18083800 | C | -3.00902700 | 5.51163400  | -0.69900200 |
| C           | 4.26633100  | 3.24064400  | -1.27981400 | H | -2.67181800 | 4.65692800  | -2.65860000 |
| C           | 2.07855100  | 4.27324300  | -1.39531300 | H | -3.24165600 | 6.08644600  | 1.37682900  |
| C           | 4.85613100  | 4.46633300  | -1.59604700 | H | -3.45321300 | 6.43211000  | -1.08709100 |
| H           | 4.90699300  | 2.36981400  | -1.13608500 | C | -2.48048000 | 1.08606700  | 2.18174900  |

C -2.19880000 0.73443700 3.51257500  
C -3.82074600 1.10288300 1.75377300  
C -3.23429700 0.40094100 4.39183400  
H -1.17423600 0.72715100 3.88391800  
C -4.85179200 0.77089000 2.63622700  
H -4.07033100 1.39103000 0.73158100  
C -4.56225800 0.41619800 3.95766400  
H -2.99580000 0.13503200 5.42502600  
H -5.88711800 0.79481800 2.28718400  
H -5.37031300 0.15933600 4.64771000  
C 0.28439900 2.01711800 2.01675700  
C 0.72171700 3.33926300 2.19743800  
C 0.99030800 0.97479900 2.64715700  
C 1.82891000 3.61243200 3.00866700  
H 0.21103300 4.16766300 1.70593800  
C 2.08707400 1.25311600 3.46642100  
H 0.68731700 -0.06440200 2.49802100  
C 2.50907100 2.57422400 3.65036200  
H 2.15846500 4.64692200 3.13578700  
H 2.61851300 0.43201800 3.95429800  
H 3.37059600 2.79237100 4.28693800  
C -2.01249000 -2.76642400 -2.08671300  
C -0.95256400 -3.68418300 -1.96185200  
C -2.78810800 -2.77750700 -3.25625900  
C -0.68581600 -4.60133700 -2.98003600  
H -0.33353800 -3.69105400 -1.06119700  
C -2.51550600 -3.69708300 -4.27625000  
H -3.61541800 -2.07687600 -3.38115900  
C -1.46721200 -4.61054500 -4.14157200  
H 0.13692100 -5.31224600 -2.86566300  
H -3.13309800 -3.69786300 -5.17841900  
H -1.25835800 -5.32927000 -4.93845700  
C -3.96675600 -0.87185400 -1.05103100  
C -5.14551500 -1.35231600 -0.45923100  
C -4.04540500 0.19410300 -1.96635600  
C -6.37987400 -0.77902700 -0.78290300  
H -5.11340700 -2.16578200 0.26668800  
C -5.28089900 0.75988500 -2.29206800  
H -3.13516200 0.58635000 -2.42771000  
C -6.45160900 0.27470800 -1.69917400  
H -7.28979200 -1.15952000 -0.31129900  
H -5.32690200 1.58623400 -3.00617000  
H -7.41824300 0.72056700 -1.94832200  
C -2.38837000 -2.66215200 0.75310000  
C -3.17149500 -3.83307000 0.73157100  
C -1.61926500 -2.37709000 1.89164100

C -3.20237000 -4.68023800 1.84116200  
H -3.75116500 -4.09449300 -0.15649500  
C -1.64772400 -3.23145200 2.99955300  
H -0.98668100 -1.48902200 1.91140100  
C -2.44278300 -4.37985600 2.97829500  
H -3.81702200 -5.58387700 1.81445200  
H -1.04249800 -2.99701500 3.87905600  
H -2.46506400 -5.04792500 3.84348400  
Pd -0.55030500 0.14062200 -0.78030100  
C 4.60216600 -5.08926800 3.34764800  
H 5.58435900 -5.26652500 3.81899900  
H 3.92042900 -4.75910800 4.14856100  
H 4.23720000 -6.04878300 2.95350800

**TS-5**

P 0.80348400 0.80027700 -0.08560700  
C -0.13745200 2.38158500 -0.33637700  
C -0.20297800 3.05537900 -1.56606100  
C -0.78696100 2.94004400 0.78006000  
C -0.90208300 4.26348400 -1.67509300  
H 0.29839600 2.65590200 -2.44818400  
C -1.47851000 4.14790000 0.66864400  
H -0.74772300 2.43632600 1.74889200  
C -1.53886500 4.81437300 -0.56058000  
H -0.93860900 4.77742900 -2.63945700  
H -1.97274500 4.57009200 1.54762200  
H -2.07905100 5.76096200 -0.64700800  
C 1.88164200 1.29135200 1.32787200  
C 2.66999700 2.45637800 1.25508100  
C 1.85625500 0.56002800 2.52428800  
C 3.44093900 2.85576800 2.34853900  
H 2.67824300 3.06231200 0.34610000  
C 2.62321200 0.96783000 3.62206300  
H 1.22469300 -0.32459100 2.60430900  
C 3.42172100 2.11036300 3.53385500  
H 4.05400300 3.75814500 2.27740400  
H 2.59092800 0.38864100 4.54863500  
H 4.02275900 2.42786800 4.39025300  
C 1.87417200 0.65806400 -1.58066200  
C 3.26883100 0.81235300 -1.55536900  
C 1.24970900 0.30611200 -2.79307700  
C 4.02023100 0.64049400 -2.72390300  
H 3.78594200 1.05498300 -0.62625700  
C 2.00171100 0.14640900 -3.95929800  
H 0.16927000 0.14355500 -2.82680600  
C 3.39078300 0.31486300 -3.92791400  
H 5.10622600 0.76077300 -2.68645800

|             |             |             |             |   |             |             |             |
|-------------|-------------|-------------|-------------|---|-------------|-------------|-------------|
| H           | 1.50037200  | -0.12043600 | -4.89340600 | H | 0.84796400  | 4.98297400  | 2.13441100  |
| H           | 3.98068400  | 0.18324200  | -4.83892400 | H | 3.27848200  | 5.26879400  | -1.42312800 |
| Pd          | -0.41190300 | -1.11930700 | 0.18241000  | H | 2.07105500  | 6.37939800  | 0.45986400  |
| C           | -2.54236500 | -0.32243200 | 0.15211500  | C | 3.13673700  | 0.15563700  | -1.28064600 |
| C           | -2.98056500 | -0.00973700 | 1.46292500  | C | 4.33594100  | -0.55739700 | -1.11934500 |
| C           | -3.05011000 | 0.49711600  | -0.88045700 | C | 2.68741700  | 0.43020400  | -2.58823000 |
| C           | -3.87011100 | 1.03619000  | 1.72762500  | C | 5.07803200  | -0.96334300 | -2.23542500 |
| H           | -2.63395700 | -0.62007200 | 2.30547900  | H | 4.69912600  | -0.81148700 | -0.12241300 |
| C           | -3.94431500 | 1.54788000  | -0.63592500 | C | 3.43651700  | 0.03659200  | -3.69950900 |
| H           | -2.75528100 | 0.29894100  | -1.91683000 | H | 1.74079000  | 0.95563400  | -2.74289700 |
| C           | -4.35699400 | 1.82015100  | 0.67255600  | C | 4.63708800  | -0.66204800 | -3.52638100 |
| H           | -4.18911500 | 1.24210400  | 2.75418300  | H | 6.00802500  | -1.51948900 | -2.08864200 |
| H           | -4.32157200 | 2.15333600  | -1.46577700 | H | 3.07570400  | 0.26911000  | -4.70519200 |
| H           | -5.05642200 | 2.63761500  | 0.87124600  | H | 5.22099800  | -0.97633500 | -4.39569100 |
| B           | -2.73286700 | -2.33266200 | -0.33406400 | C | 2.98795600  | 0.31148100  | 1.66907200  |
| O           | -2.63976600 | -2.39594000 | -1.73597800 | C | 4.26336800  | 0.86970200  | 1.87839700  |
| H           | -3.41160500 | -2.03200700 | -2.18930600 | C | 2.39474800  | -0.42786100 | 2.70428600  |
| O           | -1.57245400 | -2.94500900 | 0.27413400  | C | 4.93572000  | 0.66852900  | 3.08612300  |
| H           | -1.73783100 | -3.17950900 | 1.20120200  | H | 4.73466500  | 1.47237300  | 1.09797100  |
| O           | -3.91899400 | -2.68190100 | 0.33589900  | C | 3.06514300  | -0.62174100 | 3.91827500  |
| C           | -5.18690200 | -2.35959400 | -0.19099900 | H | 1.39386300  | -0.84307200 | 2.56081200  |
| H           | -5.32515500 | -2.75310800 | -1.21538500 | C | 4.33853900  | -0.07952400 | 4.10863400  |
| H           | -5.95905700 | -2.81288800 | 0.45098800  | H | 5.92788200  | 1.10415200  | 3.23309800  |
| H           | -5.35906400 | -1.26805700 | -0.21498800 | H | 2.58708000  | -1.19678200 | 4.71592500  |
| C           | 1.31683100  | -2.19232000 | 0.36930800  | H | 4.86467200  | -0.23172600 | 5.05506400  |
| C           | 1.58167400  | -2.81115200 | 1.60796200  | C | -3.16121000 | 0.14296000  | 1.25802400  |
| C           | 2.10877900  | -2.57071000 | -0.72944500 | C | -4.36866800 | -0.54739500 | 1.06301800  |
| C           | 2.60310700  | -3.76127900 | 1.74500700  | C | -2.72758800 | 0.38092200  | 2.57797000  |
| H           | 0.98038300  | -2.56610300 | 2.48925900  | C | -5.13370300 | -0.96638600 | 2.15860000  |
| C           | 3.12938100  | -3.52481400 | -0.59715100 | H | -4.72088000 | -0.77317700 | 0.05542900  |
| H           | 1.93376200  | -2.12949300 | -1.71368200 | C | -3.49951000 | -0.02507200 | 3.66898900  |
| C           | 3.38536800  | -4.12031000 | 0.64165600  | H | -1.77491100 | 0.88694000  | 2.75807500  |
| H           | 2.78468200  | -4.22388500 | 2.72038000  | C | -4.70786200 | -0.70073800 | 3.46240300  |
| H           | 3.72578700  | -3.80186400 | -1.47225100 | H | -6.06972700 | -1.50462900 | 1.98563500  |
| H           | 4.18361200  | -4.86075100 | 0.74639300  | H | -3.15031400 | 0.17906900  | 4.68487500  |
| <b>TS-6</b> |             |             |             | H | -5.30965000 | -1.02521300 | 4.31563400  |
| P           | -2.01658800 | 0.62304400  | -0.11177000 | C | -2.05235500 | 2.48500100  | -0.10102200 |
| P           | 2.01916400  | 0.61720300  | 0.11718300  | C | -2.72520000 | 3.26426600  | 0.85318200  |
| C           | 2.05604600  | 2.47911100  | 0.13386200  | C | -1.37091100 | 3.13803700  | -1.14627800 |
| C           | 1.36955100  | 3.11667600  | 1.18528500  | C | -2.72036300 | 4.66219900  | 0.76084800  |
| C           | 2.73896500  | 3.27191500  | -0.80192300 | H | -3.27017700 | 2.79095000  | 1.67149400  |
| C           | 1.38042200  | 4.50748500  | 1.30634100  | C | -1.37738000 | 4.53071000  | -1.24353900 |
| H           | 0.82945500  | 2.52033800  | 1.92628700  | H | -0.83870500 | 2.55245300  | -1.90136500 |
| C           | 2.73834000  | 4.66806100  | -0.68592700 | C | -2.05208300 | 5.29958000  | -0.28727400 |
| H           | 3.28810900  | 2.81049700  | -1.62427000 | H | -3.25310900 | 5.25213900  | 1.51200900  |
| C           | 2.06462800  | 5.28994100  | 0.36805000  | H | -0.84917900 | 5.01824100  | -2.06733600 |



|                 |             |             |             |   |             |             |             |
|-----------------|-------------|-------------|-------------|---|-------------|-------------|-------------|
| H               | -2.05536300 | 6.39045000  | -0.36062200 | H | -3.98047800 | -0.51830600 | -4.36380200 |
| C               | -2.95592500 | 0.33910500  | -1.68568900 | H | -7.30005600 | -0.04019700 | -1.64264300 |
| C               | -4.21905100 | 0.91592100  | -1.91803500 | H | -6.41599500 | -0.75738400 | -3.86404900 |
| C               | -2.35281700 | -0.40482400 | -2.71189300 | C | -3.58710700 | 1.33863400  | 1.67950500  |
| C               | -4.87013800 | 0.72872100  | -3.13957600 | C | -4.63225400 | 2.18888600  | 2.08668500  |
| H               | -4.69717100 | 1.52224000  | -1.14460100 | C | -3.11915100 | 0.35950700  | 2.57103200  |
| C               | -3.00186700 | -0.58503900 | -3.93952000 | C | -5.20473500 | 2.04674000  | 3.35388400  |
| H               | -1.36066900 | -0.83425800 | -2.55045400 | H | -5.00145000 | 2.96999400  | 1.41858200  |
| C               | -4.26346000 | -0.02411600 | -4.15293500 | C | -3.69388400 | 0.22008700  | 3.83868800  |
| H               | -5.85290700 | 1.17900400  | -3.30443400 | H | -2.29122000 | -0.28830700 | 2.27808500  |
| H               | -2.51623500 | -1.16384800 | -4.72983900 | C | -4.73863100 | 1.06154600  | 4.23162100  |
| H               | -4.77283800 | -0.16538900 | -5.11016200 | H | -6.01662700 | 2.71306400  | 3.65763500  |
| Pd              | -0.00018800 | -0.80133700 | 0.00688400  | H | -3.31468400 | -0.54412200 | 4.52223800  |
| C               | 0.94713100  | -2.66218100 | -0.27808100 | H | -5.18509200 | 0.95610800  | 5.22410300  |
| C               | 1.16882300  | -2.96225000 | -1.64435800 | C | -2.91574400 | 3.30284100  | -0.32103300 |
| C               | 1.80891500  | -3.27925100 | 0.65744600  | C | -3.62640300 | 3.83710000  | -1.40631100 |
| C               | 2.20719900  | -3.80630600 | -2.05117600 | C | -2.21857500 | 4.17658700  | 0.53481200  |
| H               | 0.51124900  | -2.53709200 | -2.40797600 | C | -3.64828100 | 5.22088300  | -1.62553200 |
| C               | 2.84392000  | -4.12664000 | 0.25206400  | H | -4.17166200 | 3.18132300  | -2.08764200 |
| H               | 1.66167000  | -3.10977100 | 1.72645200  | C | -2.25034400 | 5.55524900  | 0.31925800  |
| C               | 3.05411500  | -4.39778800 | -1.10633700 | H | -1.64466200 | 3.77665600  | 1.37572900  |
| H               | 2.35094300  | -4.00633100 | -3.11756000 | C | -2.96582000 | 6.08219700  | -0.76372200 |
| H               | 3.49097600  | -4.58326800 | 1.00776700  | H | -4.20703000 | 5.62240400  | -2.47531800 |
| H               | 3.86033100  | -5.06555200 | -1.42210300 | H | -1.70912400 | 6.22148600  | 0.99652600  |
| C               | -0.95655400 | -2.65794200 | 0.28771300  | H | -2.98616700 | 7.16180400  | -0.93520400 |
| C               | -1.18029100 | -2.95897000 | 1.65338500  | C | 0.71871300  | -2.52932200 | -0.93433200 |
| C               | -1.82168200 | -3.26824100 | -0.64917000 | C | 1.52660000  | -3.59613600 | -0.50785800 |
| C               | -2.22416900 | -3.79706400 | 2.05850300  | C | 1.04569800  | -1.86663600 | -2.13254700 |
| H               | -0.52048800 | -2.53899200 | 2.41796400  | C | 2.63347700  | -3.99302000 | -1.26634400 |
| C               | -2.86181000 | -4.11011800 | -0.24551100 | H | 1.29948800  | -4.12412400 | 0.42039700  |
| H               | -1.67350500 | -3.09738800 | -1.71785900 | C | 2.14710700  | -2.26934000 | -2.89198000 |
| C               | -3.07422200 | -4.38197800 | 1.11241800  | H | 0.43529500  | -1.02468200 | -2.47187200 |
| H               | -2.36967900 | -3.99774400 | 3.12452200  | C | 2.94529200  | -3.33348800 | -2.45864700 |
| H               | -3.51144000 | -4.56154900 | -1.00212700 | H | 3.25627600  | -4.82171500 | -0.91840600 |
| H               | -3.88472200 | -5.04516200 | 1.42686200  | H | 2.38941800  | -1.74165900 | -3.81809600 |
| <b>TS-oxcyc</b> |             |             |             | H | 3.81419000  | -3.64250100 | -3.04602700 |
| P               | -0.75440400 | -1.92304700 | 0.01084700  | C | -2.16970800 | -2.84958500 | -0.74018000 |
| P               | -2.80708100 | 1.48576700  | 0.01115400  | C | -2.03095900 | -3.68617500 | -1.85917200 |
| C               | -4.00509300 | 0.74696700  | -1.18422400 | C | -3.44723600 | -2.67934400 | -0.17386400 |
| C               | -3.51290600 | 0.33060800  | -2.43403800 | C | -3.14506400 | -4.34207400 | -2.39713200 |
| C               | -5.37556900 | 0.60684900  | -0.90917700 | H | -1.05219000 | -3.83588300 | -2.31874800 |
| C               | -4.37672400 | -0.20084900 | -3.39566200 | C | -4.55471600 | -3.34318400 | -0.70589800 |
| H               | -2.44497300 | 0.41875200  | -2.65233700 | H | -3.57970000 | -2.02844100 | 0.69416400  |
| C               | -6.23603500 | 0.06656300  | -1.87049100 | C | -4.40734800 | -4.17581200 | -1.82191000 |
| H               | -5.78251900 | 0.91440100  | 0.05576500  | H | -3.01949200 | -4.99048200 | -3.26864200 |
| C               | -5.74057900 | -0.33514900 | -3.11510400 | H | -5.53861300 | -3.20500200 | -0.24982100 |

|              |             |             |             |   |             |             |             |
|--------------|-------------|-------------|-------------|---|-------------|-------------|-------------|
| H            | -5.27551000 | -4.69141700 | -2.24125400 | C | -2.85757300 | 2.59545200  | 0.08267100  |
| C            | -0.58218000 | -2.70848500 | 1.67631300  | C | -3.64394500 | 2.16462400  | -1.00125600 |
| C            | -1.00850300 | -4.02322100 | 1.93813300  | C | -3.43883500 | 3.42657500  | 1.05450800  |
| C            | 0.01016800  | -1.96347900 | 2.71187500  | C | -4.97672800 | 2.56869800  | -1.11946200 |
| C            | -0.84224800 | -4.58205500 | 3.20896400  | H | -3.20922900 | 1.50395600  | -1.75680200 |
| H            | -1.47254400 | -4.61938000 | 1.14931800  | C | -4.77634800 | 3.82091700  | 0.94044700  |
| C            | 0.17882000  | -2.52938600 | 3.98066400  | H | -2.85530200 | 3.77003300  | 1.91067200  |
| H            | 0.33431200  | -0.93215200 | 2.54035400  | C | -5.54710600 | 3.39642600  | -0.14637900 |
| C            | -0.24707400 | -3.83718900 | 4.23287800  | H | -5.57329100 | 2.22819900  | -1.97006000 |
| H            | -1.17905500 | -5.60503000 | 3.39828800  | H | -5.21638500 | 4.46437400  | 1.70726300  |
| H            | 0.64071900  | -1.93883000 | 4.77666700  | H | -6.59209100 | 3.70625700  | -0.23299100 |
| H            | -0.11946000 | -4.27495300 | 5.22675100  | C | -0.54781100 | 2.29865300  | 1.88319800  |
| Pd           | -0.69012200 | 0.56675300  | -0.17263700 | C | -0.23949600 | 3.57382700  | 2.39195900  |
| C            | 1.40052400  | 1.83264600  | -0.43820300 | C | -0.41990100 | 1.18220700  | 2.72764500  |
| C            | 0.20412800  | 2.24255300  | -0.75748700 | C | 0.17210600  | 3.72615800  | 3.71921500  |
| C            | 2.74482300  | 2.21361100  | -1.00205500 | H | -0.31447900 | 4.45532000  | 1.75108000  |
| H            | 2.85954300  | 1.90389000  | -2.04893400 | C | -0.01055500 | 1.33706300  | 4.05646700  |
| H            | 2.87198700  | 3.31018000  | -0.96512400 | H | -0.62891000 | 0.18285400  | 2.33743100  |
| N            | 3.81141100  | 1.61012000  | -0.17828900 | C | 0.28485500  | 2.60932100  | 4.55497600  |
| C            | 3.33976900  | 1.52072700  | 1.19861500  | H | 0.40878500  | 4.72306400  | 4.10102800  |
| H            | 4.01417900  | 0.90029300  | 1.80794700  | H | 0.08539500  | 0.45818300  | 4.69963500  |
| H            | 3.31400300  | 2.53150000  | 1.63924200  | H | 0.61032500  | 2.73109800  | 5.59169700  |
| C            | 1.91575000  | 0.92070900  | 1.25941700  | C | -0.19127100 | 3.36534000  | -0.77979500 |
| O            | 1.17970300  | 1.22102500  | 2.25251100  | C | -0.83402900 | 4.35898900  | -1.53556600 |
| H            | 1.93154700  | -0.13276800 | 0.90618200  | C | 1.21657200  | 3.32680300  | -0.76998900 |
| S            | 4.65745200  | 0.28789000  | -0.78715100 | C | -0.08379900 | 5.29132700  | -2.26460400 |
| O            | 4.23369500  | -0.97423400 | -0.14492200 | H | -1.92398800 | 4.41597600  | -1.56262500 |
| O            | 4.58514700  | 0.38051000  | -2.25826300 | C | 1.96138100  | 4.25985700  | -1.49272800 |
| C            | 6.34186600  | 0.60177700  | -0.28139700 | H | 1.74286100  | 2.56412600  | -0.19148400 |
| C            | 6.95235100  | -0.23754200 | 0.65132500  | C | 1.31261200  | 5.24607600  | -2.24692400 |
| C            | 7.03946000  | 1.66823300  | -0.86500000 | H | -0.60051700 | 6.05869400  | -2.84782900 |
| C            | 8.28113400  | 0.00509200  | 1.01287200  | H | 3.05319900  | 4.20247400  | -1.47024600 |
| H            | 6.40003500  | -1.07124600 | 1.08756900  | H | 1.89456100  | 5.97419200  | -2.81845600 |
| C            | 8.36151000  | 1.89225100  | -0.49244300 | C | -2.66877200 | -2.92146400 | -1.43419300 |
| H            | 6.55646400  | 2.31384700  | -1.60173900 | C | -2.83473900 | -4.30739100 | -1.27100300 |
| C            | 9.00558400  | 1.06793700  | 0.45258400  | C | -2.78894100 | -2.36799200 | -2.72213500 |
| H            | 8.76158800  | -0.64965400 | 1.74475300  | C | -3.12149600 | -5.11990500 | -2.37298900 |
| H            | 8.91057500  | 2.72307700  | -0.94451800 | H | -2.74326500 | -4.76073200 | -0.28159000 |
| H            | -0.23600900 | 3.06579100  | -1.32694400 | C | -3.08503400 | -3.18089200 | -3.82006200 |
| C            | 10.43567700 | 1.33302500  | 0.84078200  | H | -2.64495300 | -1.29374900 | -2.86747300 |
| H            | 11.09646100 | 1.30016500  | -0.04186300 | C | -3.24975100 | -4.55961100 | -3.64813200 |
| H            | 10.54376900 | 2.33893400  | 1.28080000  | H | -3.24646300 | -6.19703800 | -2.23184600 |
| H            | 10.80145700 | 0.59764000  | 1.57202100  | H | -3.17883800 | -2.73594000 | -4.81439000 |
| <b>TS-LA</b> |             |             |             | H | -3.47338900 | -5.19705600 | -4.50789800 |
| P            | -2.28476600 | -1.78170900 | -0.03116400 | C | -3.94647100 | -1.28634200 | 0.60361300  |
| P            | -1.09780800 | 2.03012000  | 0.13796400  | C | -5.14602500 | -1.70136300 | 0.00123200  |

C -4.00830200 -0.42365700 1.71471700  
C -6.37877600 -1.26726800 0.50263400  
H -5.12816300 -2.36872400 -0.86234400  
C -5.24003900 -0.00161700 2.21943600  
H -3.08805500 -0.08037300 2.19371100  
C -6.43043500 -0.41993500 1.61253000  
H -7.30280700 -1.59930200 0.02133800  
H -5.26972400 0.66333200 3.08671000  
H -7.39440200 -0.08365600 2.00371700  
C -1.62014100 -2.89936800 1.28384500  
C -2.41309000 -3.44643400 2.30700200  
C -0.24919100 -3.21521500 1.24198200  
C -1.84446100 -4.29004800 3.26794000  
H -3.47997600 -3.22025400 2.35965800  
C 0.31344400 -4.06540000 2.19743200  
H 0.37897800 -2.79390800 0.45261200  
C -0.48249200 -4.60200100 3.21588900  
H -2.47315300 -4.70707900 4.05949600  
H 1.37949200 -4.30354000 2.14955600  
H -0.04097600 -5.26062100 3.96874100  
Pd -0.69984600 -0.12054100 -0.71165500  
C 3.37054700 -0.38655100 -3.76973600  
C 2.11148800 -0.56289300 -3.77908500  
H 1.27383900 -0.71994200 -4.45651800  
C 4.36314700 -0.07895100 -2.72211000  
H 5.06252000 -0.92930600 -2.59981600  
H 4.96188700 0.80394000 -2.99196500  
N 3.64431100 0.20784400 -1.45646100  
C 2.56233900 -0.72109300 -1.12425900  
H 2.89412400 -1.77257100 -1.20852400  
H 2.24563600 -0.54755200 -0.08875100  
C 1.35658000 -0.53232400 -2.05921700  
O 0.41709800 -1.43280300 -2.00582800  
H 1.03650900 0.52863400 -2.21578800  
S 4.50020700 0.95168000 -0.22733400  
O 5.21421300 2.08087400 -0.84866700  
O 3.54336500 1.21358800 0.86404800  
C 5.72926100 -0.19030200 0.39370000  
C 7.01606100 -0.18537100 -0.15385300  
C 5.37950100 -1.09373600 1.40692500  
C 7.95754600 -1.10329800 0.31795900  
H 7.28655200 0.53327600 -0.92940000  
C 6.33372200 -2.00089800 1.86273300  
H 4.37955500 -1.07945300 1.84414600  
C 7.63618800 -2.02415100 1.32837100  
H 8.96500500 -1.09785900 -0.10652900

H 6.06467400 -2.70328700 2.65668400  
C 8.65297200 -3.00521400 1.84814500  
H 9.59302700 -2.95704300 1.27971100  
H 8.88438800 -2.80362300 2.90835300  
H 8.26907200 -4.03750100 1.79820900

#### TS-TM

P 2.37857700 -1.19240500 -0.20040500  
C 1.21158200 -2.54792000 -0.64196100  
C 0.70518900 -3.44852500 0.30859900  
C 0.74938400 -2.62669800 -1.96982800  
C -0.22562200 -4.42408600 -0.06835200  
H 1.02200000 -3.39157000 1.35125000  
C -0.17312700 -3.60675000 -2.34359900  
H 1.11518400 -1.92236700 -2.72182200  
C -0.66116500 -4.51114300 -1.39340900  
H -0.61041000 -5.11829800 0.68341600  
H -0.51417800 -3.66100800 -3.38085300  
H -1.38346700 -5.27806400 -1.68554700  
C 3.80783300 -1.42459800 -1.35964100  
C 4.02892200 -2.61914800 -2.06810300  
C 4.74382700 -0.38072600 -1.47865700  
C 5.15650500 -2.75995800 -2.88384200  
H 3.32748100 -3.45100500 -1.98913600  
C 5.87078700 -0.52806300 -2.29279400  
H 4.59441000 0.55274600 -0.93463900  
C 6.07916200 -1.71613100 -3.00034000  
H 5.31291100 -3.69509600 -3.42846800  
H 6.58779800 0.29336500 -2.37457200  
H 6.95882600 -1.82881700 -3.63980200  
C 3.12111800 -1.65941200 1.42439400  
C 3.76469800 -2.89758900 1.60565600  
C 3.09848300 -0.73850700 2.48359700  
C 4.36132800 -3.20834000 2.82947900  
H 3.80602600 -3.62279700 0.78922000  
C 3.70042200 -1.05112900 3.70786800  
H 2.61205100 0.23074500 2.34526100  
C 4.32968400 -2.28619300 3.88303100  
H 4.85744900 -4.17379500 2.96028000  
H 3.67657600 -0.32457600 4.52435200  
H 4.80056700 -2.53124200 4.83892000  
Pd 1.44838400 0.98797200 -0.13642800  
C -0.28280400 0.19628700 0.48656300  
C -0.49806100 -0.17229000 1.76074200  
C -1.35796100 0.05661600 -0.56618700  
H -1.05950400 -0.71028900 -1.30234100  
H -1.47590900 0.99028800 -1.13033000

N -2.68294500 -0.33357900 -0.02672900  
C -2.63409200 -1.28389100 1.08823800  
H -2.17566600 -2.21189500 0.70934400  
H -3.65515200 -1.53585800 1.41266300  
C -1.78679200 -0.77710200 2.26250000  
O -1.45108400 -1.86121100 3.12967700  
H -2.36126100 -0.02031500 2.83119100  
S -3.88099100 0.83853000 0.03569200  
O -3.69684800 1.69036300 -1.15563400  
O -3.94763100 1.51138700 1.35193600  
C -5.38622500 -0.10382800 -0.16818300  
C -5.61962800 -0.75295700 -1.38821900  
C -6.33058700 -0.13193400 0.85873900  
C -6.81371400 -1.44600800 -1.56416700  
H -4.87865900 -0.71627600 -2.18973900  
C -7.52397700 -0.83332700 0.66209300  
H -6.13742600 0.38781600 1.79852000  
C -7.78557900 -1.50026400 -0.54452100  
H -7.00114200 -1.95560200 -2.51353900  
H -8.26507500 -0.85931800 1.46539500  
H 0.27447100 -0.05857900 2.52892600  
H -2.25626900 -2.13296300 3.59656700  
C 0.58120800 3.02427500 -0.17696200  
C 0.15135100 3.33993800 -1.49070900  
C -0.24653300 3.47107900 0.87839400  
C -1.01973500 4.06246100 -1.73676600  
H 0.76278700 3.03078900 -2.34590300  
C -1.42527800 4.18841000 0.64826400  
H 0.04648800 3.26129500 1.91179100  
C -1.81427500 4.48534100 -0.66318400  
H -1.31892900 4.29384500 -2.76346400  
H -2.04324600 4.51530100 1.48964300  
H -2.73632500 5.04346200 -0.84965500  
B 2.54291200 3.38803200 0.12361500  
O 2.74861000 3.41080300 1.51746800  
H 2.56998800 2.55423500 1.92954100  
O 3.18810600 2.28132000 -0.57259800  
H 3.24571200 2.44709900 -1.52697600  
O 2.77148600 4.60882000 -0.54123400  
C 2.33058000 5.82817000 0.01353600  
H 2.69413300 5.97319100 1.04629500  
H 2.71604300 6.65463300 -0.60546500  
H 1.22708600 5.89843800 0.02759700  
C -9.06823700 -2.25848000 -0.75873300  
H -9.73078500 -2.19239300 0.11639900  
H -9.61395200 -1.86999200 -1.63507200

H -8.86616500 -3.32467900 -0.95766800  
**TS-RE**  
P -1.16348800 2.22684000 0.01361800  
P -2.63652600 -1.51557300 -0.43173300  
C -4.20523400 -0.85515900 -1.18619900  
C -4.06960800 -0.06696700 -2.34539700  
C -5.49403900 -1.09978000 -0.68665600  
C -5.19243300 0.44932800 -2.99489500  
H -3.07554300 0.13762700 -2.75333800  
C -6.61919300 -0.57148200 -1.33306200  
H -5.63598800 -1.71227000 0.20534900  
C -6.47408900 0.19994600 -2.48871000  
H -5.06596800 1.05256200 -3.89798800  
H -7.61540400 -0.77528900 -0.93043800  
H -7.35429300 0.60638900 -2.99411200  
C -3.22578400 -2.63896500 0.91247800  
C -3.05623200 -4.03308400 0.90200200  
C -3.77556200 -2.03608200 2.06172700  
C -3.44841100 -4.80550000 2.00222200  
H -2.61007600 -4.53003100 0.03927100  
C -4.18063500 -2.81003800 3.15163200  
H -3.88751300 -0.94918300 2.10860000  
C -4.01790200 -4.20003800 3.12520200  
H -3.30506500 -5.88925100 1.97625900  
H -4.61535100 -2.32371400 4.02919400  
H -4.32669300 -4.80648200 3.98096800  
C -2.09779500 -2.62022300 -1.82016700  
C -2.96350000 -3.56526500 -2.40282100  
C -0.81213700 -2.45707400 -2.35962100  
C -2.54046300 -4.34227200 -3.48385100  
H -3.97799000 -3.69282800 -2.01688800  
C -0.39099100 -3.23075900 -3.44806400  
H -0.14077300 -1.71020900 -1.92774900  
C -1.25219400 -4.17766600 -4.00817300  
H -3.22205700 -5.07544000 -3.92389100  
H 0.61273200 -3.08922200 -3.85786600  
H -0.92487300 -4.78374200 -4.85743600  
C 0.10049900 2.93410000 -1.13123100  
C 1.20927700 3.67328500 -0.68472600  
C 0.02410900 2.59297100 -2.49711000  
C 2.19719700 4.08776400 -1.58714000  
H 1.32255700 3.91799300 0.37252200  
C 1.00713000 3.01425100 -3.39545800  
H -0.81126500 1.99148700 -2.86592700  
C 2.09714500 3.76785300 -2.94347700  
H 3.05103900 4.66440700 -1.22096400

H 0.92333000 2.74800500 -4.45267800  
H 2.86775000 4.09700200 -3.64571700  
C -2.78036000 2.93445000 -0.57773500  
C -2.91513100 3.87298400 -1.61300400  
C -3.93281500 2.52888300 0.12122700  
C -4.17419300 4.39153500 -1.94120800  
H -2.04036900 4.21714800 -2.16743900  
C -5.18529300 3.05778100 -0.19733100  
H -3.84982600 1.79891700 0.93142200  
C -5.31069400 3.99015100 -1.23419800  
H -4.26086500 5.12179600 -2.75073100  
H -6.06776800 2.73571300 0.36190000  
H -6.29131400 4.40115100 -1.48897300  
C -1.01578800 3.20249800 1.58566400  
C -0.97607900 4.60948100 1.59315700  
C -1.04722000 2.51998600 2.81158100  
C -0.94526400 5.31119900 2.80058000  
H -0.97726700 5.16610700 0.65269400  
C -1.02686000 3.22404200 4.02171500  
H -1.09826100 1.42843600 2.81623700  
C -0.96948900 4.61982800 4.01836500  
H -0.91046900 6.40414800 2.79113300  
H -1.05500400 2.67655100 4.96772600  
H -0.94982800 5.17165300 4.96218000  
Pd -0.73210700 -0.16605200 0.39800200  
C 1.29786000 -0.06439900 0.96978000  
C 1.79747500 0.57802200 2.05310300  
C 2.16234600 -0.16671500 -0.27739100  
H 1.85975800 0.61264600 -0.99665500  
H 2.03691600 -1.12409900 -0.79330700  
N 3.60648100 0.03698600 -0.03037100  
C 3.88925600 1.21706100 0.79232600  
H 3.53152300 2.09169700 0.22671700  
H 4.97565700 1.33638400 0.92230900  
C 3.16720700 1.19480600 2.14790000  
O 3.02355600 2.52963400 2.64672800  
H 3.76887300 0.61084100 2.87272400  
S 4.55853700 -1.31739200 0.24661500  
O 4.00548600 -2.39871700 -0.59159500  
O 4.74009400 -1.59069800 1.68878000  
C 6.14819100 -0.83958200 -0.41734600  
C 6.27155400 -0.62084500 -1.79632400  
C 7.25292600 -0.74937100 0.43041600  
C 7.52062200 -0.29658600 -2.31768800  
H 5.40346400 -0.70253000 -2.45392800  
C 8.49918200 -0.42282400 -0.11289700

H 7.14241900 -0.93401200 1.50015200  
C 8.65514700 -0.19008600 -1.48783700  
H 7.62222200 -0.12355900 -3.39279400  
H 9.36607500 -0.35021300 0.54919300  
H 1.22589900 0.62332400 2.98522200  
H 3.89936100 2.84155000 2.92318000  
C 0.30845300 -1.70130800 1.40508900  
C -0.10598000 -1.81670900 2.75819600  
C 0.81420100 -2.87035800 0.79456200  
C -0.02457800 -3.02446300 3.44991800  
H -0.48161800 -0.93504800 3.28558100  
C 0.91403200 -4.07917000 1.49662500  
H 1.14029900 -2.85388600 -0.24618600  
C 0.49634000 -4.16924500 2.82680900  
H -0.36331700 -3.07308500 4.48946900  
H 1.31831200 -4.95997200 0.98784400  
H 0.57288000 -5.11345100 3.37280700  
C 9.99376300 0.16945300 -2.07524100  
H 10.78930800 0.15071300 -1.31621200  
H 10.27034700 -0.52676900 -2.88449500  
H 9.96830100 1.17915300 -2.51976400

**TS-endo(T-shape)**

P 2.14974700 0.68701300 -0.03867900  
P -0.98037700 -1.56719300 0.12457900  
C -0.40012200 -2.41194300 -1.41310300  
C -0.71473500 -1.79487400 -2.63995500  
C 0.35655800 -3.59449300 -1.42525800  
C -0.30723800 -2.36354900 -3.84871700  
H -1.28308100 -0.86056500 -2.65092500  
C 0.77435600 -4.15528300 -2.63833800  
H 0.63178000 -4.08722000 -0.49190900  
C 0.43965600 -3.54734300 -3.85108700  
H -0.56735800 -1.87506100 -4.79164400  
H 1.36618200 -5.07447400 -2.62987900  
H 0.76551300 -3.98959300 -4.79638100  
C -0.30751500 -2.52803000 1.55858200  
C -0.66489000 -3.87307900 1.77404100  
C 0.51526500 -1.88667000 2.49741600  
C -0.18495000 -4.56287300 2.88996200  
H -1.32797200 -4.38668700 1.07391700  
C 0.98763100 -2.57645000 3.62031600  
H 0.77946100 -0.83668400 2.35369200  
C 0.64321700 -3.91636200 3.81557500  
H -0.46621500 -5.60850400 3.04183300  
H 1.62325100 -2.05989400 4.34450200  
H 1.01124200 -4.45628500 4.69228900

|    |             |             |             |
|----|-------------|-------------|-------------|
| C  | -2.77009100 | -2.03857000 | 0.24974700  |
| C  | -3.43757600 | -2.81733100 | -0.70804100 |
| C  | -3.48264500 | -1.58497300 | 1.37541200  |
| C  | -4.79177900 | -3.13533800 | -0.54225200 |
| H  | -2.90908700 | -3.18468900 | -1.58970700 |
| C  | -4.82942000 | -1.91144300 | 1.54288400  |
| H  | -2.98214200 | -0.97012700 | 2.12934600  |
| C  | -5.49023900 | -2.68618000 | 0.58139000  |
| H  | -5.29824900 | -3.74331500 | -1.29701600 |
| H  | -5.36776200 | -1.55416100 | 2.42498600  |
| H  | -6.54654200 | -2.93757100 | 0.70949900  |
| C  | 2.57535000  | 2.01747200  | -1.25988600 |
| C  | 3.75030500  | 2.78532700  | -1.18852500 |
| C  | 1.66646100  | 2.26446300  | -2.30484600 |
| C  | 4.00836100  | 3.77550000  | -2.14191700 |
| H  | 4.47164500  | 2.62007200  | -0.38588900 |
| C  | 1.93101200  | 3.24806900  | -3.26323900 |
| H  | 0.74248400  | 1.68227700  | -2.36604900 |
| C  | 3.10193400  | 4.00832800  | -3.18175500 |
| H  | 4.92420600  | 4.36853200  | -2.06972200 |
| H  | 1.21517500  | 3.42446400  | -4.07064000 |
| H  | 3.30610100  | 4.78404200  | -3.92478300 |
| C  | 3.10485100  | -0.77320300 | -0.66285900 |
| C  | 3.48575900  | -0.88197700 | -2.01121300 |
| C  | 3.39445100  | -1.84119500 | 0.20794600  |
| C  | 4.14965900  | -2.02386700 | -2.47371600 |
| H  | 3.27084900  | -0.07305100 | -2.71235000 |
| C  | 4.06574300  | -2.97592600 | -0.25489700 |
| H  | 3.10654700  | -1.78739900 | 1.25983400  |
| C  | 4.44644700  | -3.07190300 | -1.59806000 |
| H  | 4.44074500  | -2.08775600 | -3.52577200 |
| H  | 4.29124800  | -3.78969900 | 0.43981900  |
| H  | 4.97178400  | -3.96002800 | -1.95944700 |
| C  | 3.05430500  | 1.17605200  | 1.49968500  |
| C  | 4.42802700  | 0.94473300  | 1.69811700  |
| C  | 2.32529600  | 1.82993300  | 2.50867100  |
| C  | 5.05443200  | 1.36456600  | 2.87551700  |
| H  | 5.01774200  | 0.43362100  | 0.93427700  |
| C  | 2.95474100  | 2.25395800  | 3.68365500  |
| H  | 1.25423800  | 2.00517800  | 2.37503700  |
| C  | 4.32065200  | 2.02103000  | 3.86982100  |
| H  | 6.12274400  | 1.17784500  | 3.01521000  |
| H  | 2.37246500  | 2.76150400  | 4.45738400  |
| H  | 4.81319400  | 2.34653900  | 4.79013800  |
| Pd | -0.32032800 | 0.67473300  | 0.13298800  |
| C  | -1.96333200 | 1.90559400  | 0.11877200  |

|   |             |            |             |
|---|-------------|------------|-------------|
| C | -1.16016400 | 2.88604400 | 0.42986700  |
| C | -3.39222300 | 4.19473500 | 1.01865500  |
| C | -2.06075100 | 4.66471700 | 0.40755800  |
| O | -1.36618400 | 5.50706400 | 1.02924800  |
| H | -2.08830800 | 4.70058400 | -0.71200600 |
| H | -0.11906600 | 3.04228300 | 0.72659200  |
| H | -3.17852200 | 3.87246400 | 2.05445700  |
| H | -4.03569500 | 5.08884400 | 1.08915600  |
| C | -4.10254300 | 3.11834500 | 0.24075600  |
| C | -3.38775100 | 1.96700100 | -0.19457800 |
| C | -4.04817700 | 0.98478800 | -0.95167200 |
| C | -5.40279400 | 1.11353400 | -1.26484900 |
| C | -6.11277700 | 2.23528300 | -0.82574900 |
| C | -5.46044000 | 3.22828800 | -0.08635600 |
| H | -3.48590500 | 0.11837200 | -1.30112700 |
| H | -5.90191300 | 0.33973800 | -1.85404400 |
| H | -7.17403500 | 2.34433600 | -1.06579900 |
| H | -6.01665700 | 4.11110000 | 0.24232700  |

#### TS-L2-endo(Y-shape)

|    |             |             |             |
|----|-------------|-------------|-------------|
| P  | -2.16709900 | 1.78207700  | -0.00774200 |
| P  | -1.02186100 | -2.11376800 | -0.15735100 |
| C  | -2.83142700 | -2.48264600 | -0.39420500 |
| C  | -3.59928000 | -1.63233300 | -1.20989900 |
| C  | -3.46211900 | -3.59586700 | 0.19032400  |
| C  | -4.95066100 | -1.89660600 | -1.45227300 |
| H  | -3.14163900 | -0.74991100 | -1.65910100 |
| C  | -4.81712400 | -3.85389600 | -0.04367100 |
| H  | -2.90162400 | -4.27374700 | 0.83588900  |
| C  | -5.56541600 | -3.00847900 | -0.86809900 |
| H  | -5.52599400 | -1.22314200 | -2.09318200 |
| H  | -5.28796600 | -4.72324700 | 0.42374500  |
| H  | -6.62422800 | -3.21178900 | -1.05010700 |
| C  | -3.76946300 | 1.25444800  | 0.77399700  |
| C  | -5.04023100 | 1.65385200  | 0.32554500  |
| C  | -3.69143900 | 0.40971400  | 1.89690000  |
| C  | -6.19716000 | 1.22688400  | 0.98676000  |
| H  | -5.14368900 | 2.29539100  | -0.55049200 |
| C  | -4.84697300 | -0.00792700 | 2.56432300  |
| H  | -2.71516700 | 0.06534100  | 2.24793000  |
| C  | -6.10535000 | 0.39873600  | 2.10966200  |
| H  | -7.17642300 | 1.54488100  | 0.61809600  |
| H  | -4.76194500 | -0.66224200 | 3.43625200  |
| H  | -7.01095100 | 0.06668800  | 2.62465400  |
| Pd | -0.34438900 | 0.11824100  | 0.18467800  |
| C  | 1.62223500  | -0.10383100 | 0.73847000  |
| C  | 1.69918900  | 1.18620700  | 0.74813600  |

C 2.55173300 -1.14505400 1.26663300  
H 2.04857000 -1.73785500 2.04953800  
H 2.84483900 -1.85828200 0.48619800  
N 3.75461300 -0.53284600 1.85005300  
C 3.53988400 0.59157000 2.75209300  
H 2.80948500 0.28396100 3.51924900  
H 4.48438800 0.81061000 3.27434600  
C 3.04383800 1.91087200 2.14309800  
O 2.42497200 2.70615600 2.88669600  
H 3.68232600 2.30171000 1.31861600  
S 5.24864600 -0.81513200 1.16613000  
O 6.24699800 -0.40599600 2.16814900  
O 5.22429900 -2.20825000 0.68823500  
C 5.47720500 0.23201300 -0.27108300  
C 6.11947900 1.46558800 -0.12837900  
C 5.00843900 -0.19490100 -1.52024600  
C 6.27727600 2.28351000 -1.24950900  
H 6.50193800 1.78197500 0.84351800  
C 5.17262500 0.63733000 -2.62639600  
H 4.53375200 -1.17122300 -1.63202100  
C 5.80522900 1.88965200 -2.51251300  
H 6.78308500 3.24640900 -1.13879800  
H 4.80896700 0.30403600 -3.60254300  
H 1.22788200 2.10038600 0.39519900  
C 5.97835700 2.76867300 -3.72255600  
H 6.60742300 2.27322300 -4.48172000  
H 5.00724100 2.97747100 -4.20179000  
H 6.44819500 3.72858200 -3.46342900  
C -1.86547000 3.43213500 0.88021100  
C -1.48609500 3.21401800 2.35752000  
C -0.81852200 4.30704300 0.16540500  
H -2.83599800 3.95889700 0.85075800  
C -1.25074500 4.54537700 3.08703600  
H -0.56238200 2.61130900 2.41279500  
H -2.27160500 2.64100800 2.87570400  
C -0.57777000 5.62942900 0.90979100  
H 0.13678300 3.75907000 0.09495200  
H -1.13145200 4.51803500 -0.86844400  
C -0.19628800 5.39942700 2.37545000  
H -0.94489700 4.34358900 4.12804200  
H -2.20212400 5.10655700 3.14281500  
H 0.20875400 6.20398900 0.39079200  
H -1.49596000 6.24407900 0.86314100  
H -0.06785700 6.36488200 2.89469000  
H 0.77813300 4.88025100 2.42281000  
C -0.26695500 -2.99986300 -1.64509300

C -0.69335400 -2.35751000 -2.97918500  
C 1.26811100 -3.08220100 -1.56739800  
H -0.68240400 -4.02267400 -1.61319700  
C -0.11009600 -3.11837200 -4.17952300  
H -0.33939600 -1.31094900 -3.00372600  
H -1.78985500 -2.32515300 -3.06538500  
C 1.85240700 -3.84728900 -2.76441500  
H 1.67852700 -2.05759000 -1.55803000  
H 1.58839500 -3.56134100 -0.62987400  
C 1.41520500 -3.23488700 -4.09876100  
H -0.40928100 -2.61456400 -5.11469100  
H -0.55283500 -4.13093700 -4.21480900  
H 2.95330300 -3.86244700 -2.68927800  
H 1.52172500 -4.90135200 -2.71866800  
H 1.79971900 -3.83459800 -4.94165200  
H 1.86244500 -2.22848500 -4.20032500  
C -2.60913000 2.32667000 -1.72350700  
C -3.40742400 3.45351800 -2.00327900  
C -2.07555800 1.60150000 -2.80327700  
C -3.67850700 3.82528900 -3.32333200  
H -3.81763100 4.05817700 -1.19160500  
C -2.34804100 1.97252500 -4.12501700  
H -1.43229700 0.74027900 -2.60520500  
C -3.15318600 3.08385900 -4.38787800  
H -4.30052200 4.70267200 -3.52077700  
H -1.92356500 1.39289600 -4.94922200  
H -3.36585000 3.37796800 -5.41931800  
C -0.59735900 -3.18753600 1.29281900  
C -0.28187100 -4.55425300 1.18707600  
C -0.62049600 -2.60084600 2.57103400  
C 0.00924500 -5.30836000 2.32933600  
H -0.26482300 -5.04808900 0.21360500  
C -0.34322200 -3.35777600 3.71337000  
H -0.84942100 -1.53601500 2.67068400  
C -0.02272100 -4.71419100 3.59469700  
H 0.25887700 -6.36800300 2.22675700  
H -0.36955900 -2.88291100 4.69786700  
H 0.20405400 -5.30599400 4.48569900

**TS-L2-endo(T-shape)**

P 0.08697900 -2.59232900 0.12602400  
P 2.41411500 1.46272000 -0.22660000  
Pd 1.02947700 -0.38395700 0.38248500  
C 1.36246900 -3.82660500 -0.50178000  
C 1.90049300 -3.43284700 -1.88999900  
C 2.52028500 -3.98834900 0.50155400  
H 0.83822400 -4.79254400 -0.60624700

|   |             |             |             |   |             |             |             |
|---|-------------|-------------|-------------|---|-------------|-------------|-------------|
| C | 2.94494000  | -4.44098300 | -2.39149700 | C | -5.34280900 | 0.90593400  | -2.51009500 |
| H | 2.35770400  | -2.42802400 | -1.82993100 | H | -3.48946700 | 1.97011600  | -2.18460300 |
| H | 1.07617300  | -3.36013300 | -2.61713200 | C | -6.57843500 | 0.49285100  | -1.97739000 |
| C | 3.56445600  | -4.99590600 | -0.00117500 | H | -7.84530100 | 0.55249500  | -0.22370200 |
| H | 3.00181100  | -3.00418700 | 0.64977700  | H | -5.08862300 | 0.64860600  | -3.54207500 |
| H | 2.14201500  | -4.30260700 | 1.48731500  | H | 0.39191700  | 0.52134000  | 3.56338300  |
| C | 4.09157600  | -4.62460900 | -1.39142600 | H | -3.35250900 | 0.04499800  | 2.30401800  |
| H | 3.33633300  | -4.11186800 | -3.36948100 | H | -4.09626200 | 1.57498900  | 2.82966200  |
| H | 2.45202600  | -5.41555900 | -2.56465100 | H | -1.23271200 | 1.73626100  | -0.21547000 |
| H | 4.39590300  | -5.05913500 | 0.72169300  | H | -2.03947000 | 0.18620100  | 0.11532300  |
| H | 3.10726000  | -6.00198800 | -0.04008400 | C | -7.53810500 | -0.30875100 | -2.81588500 |
| H | 4.79526300  | -5.39416500 | -1.75273400 | H | -8.46428400 | -0.53681600 | -2.26854000 |
| H | 4.66705100  | -3.68290900 | -1.32169800 | H | -7.80678000 | 0.23482200  | -3.73729300 |
| C | 4.08010800  | 0.91677500  | -0.92278500 | H | -7.08126600 | -1.26236300 | -3.13070900 |
| C | 5.01323600  | 2.04677300  | -1.39128600 | C | -0.67887900 | -3.44767800 | 1.58394800  |
| C | 4.80450000  | -0.01135700 | 0.07176200  | C | -0.64895800 | -4.84028800 | 1.78820100  |
| H | 3.79861200  | 0.30464800  | -1.79824000 | C | -1.33606400 | -2.64823300 | 2.53613600  |
| C | 6.30889900  | 1.48268900  | -1.99595300 | C | -1.26432300 | -5.40888300 | 2.90899900  |
| H | 5.27001300  | 2.68695100  | -0.52984000 | H | -0.14846100 | -5.49836500 | 1.07556800  |
| H | 4.50806000  | 2.69253200  | -2.12666900 | C | -1.95599400 | -3.21656600 | 3.65298400  |
| C | 6.10415400  | -0.56786700 | -0.52774400 | H | -1.35226400 | -1.56509700 | 2.41502500  |
| H | 5.04263600  | 0.55136200  | 0.99200700  | C | -1.92169100 | -4.60108300 | 3.84324600  |
| H | 4.13937900  | -0.83864600 | 0.37161900  | H | -1.22885500 | -6.49264400 | 3.05063500  |
| C | 7.03179500  | 0.54907400  | -1.01897300 | H | -2.45375600 | -2.56238600 | 4.37392800  |
| H | 6.97003100  | 2.31467500  | -2.29378800 | H | -2.40004800 | -5.05026400 | 4.71794500  |
| H | 6.06745300  | 0.92808900  | -2.92164000 | C | -1.24062700 | -2.69463700 | -1.16737300 |
| H | 6.61859000  | -1.19435500 | 0.22100100  | C | -2.14113000 | -3.77146800 | -1.25095900 |
| H | 5.85536600  | -1.23308500 | -1.37520600 | C | -1.32242700 | -1.66991800 | -2.12691400 |
| H | 7.93083000  | 0.11891700  | -1.49298700 | C | -3.09385700 | -3.82323000 | -2.27331100 |
| H | 7.38563600  | 1.13580800  | -0.15081900 | H | -2.10628600 | -4.57858200 | -0.51585800 |
| C | -0.46816500 | 0.68006300  | 1.48833900  | C | -2.27169800 | -1.72550600 | -3.15322800 |
| C | -0.27934600 | 0.75431300  | 2.74470400  | H | -0.63363000 | -0.82203400 | -2.06686500 |
| C | -1.59627400 | 1.08246000  | 0.58738200  | C | -3.16064700 | -2.80237600 | -3.22808000 |
| N | -2.60942800 | 1.81124000  | 1.37298900  | H | -3.78770800 | -4.66701000 | -2.32312500 |
| C | -3.14513200 | 1.10534100  | 2.53160800  | H | -2.31685500 | -0.92218500 | -3.89355000 |
| C | -2.25513900 | 1.19540600  | 3.76661300  | H | -3.90599800 | -2.84575700 | -4.02699600 |
| O | -2.35083700 | 0.36138600  | 4.67527600  | C | 2.87571300  | 2.67080700  | 1.09580000  |
| H | -1.85186800 | 2.21683200  | 3.95547200  | C | 3.18897500  | 4.02020800  | 0.84859300  |
| S | -3.59916500 | 2.89628800  | 0.56683400  | C | 2.97535800  | 2.18588200  | 2.41238000  |
| O | -4.35720800 | 3.61458600  | 1.60357900  | C | 3.58476500  | 4.86054100  | 1.89370700  |
| O | -2.72766700 | 3.65301800  | -0.34706300 | H | 3.12508900  | 4.42504300  | -0.16325900 |
| C | -4.76912000 | 1.98072800  | -0.43202000 | C | 3.38166100  | 3.02502900  | 3.45550100  |
| C | -5.99389800 | 1.59391100  | 0.12213900  | H | 2.73259100  | 1.14116200  | 2.62264500  |
| C | -4.43705300 | 1.64529100  | -1.75133900 | C | 3.68298100  | 4.36574800  | 3.19894400  |
| C | -6.88625800 | 0.85193400  | -0.65474500 | H | 3.82107800  | 5.90760100  | 1.68493600  |
| H | -6.25832900 | 1.87986700  | 1.14163400  | H | 3.45502000  | 2.62956700  | 4.47222400  |



|                            |             |             |             |   |             |             |             |
|----------------------------|-------------|-------------|-------------|---|-------------|-------------|-------------|
| H                          | 3.99251900  | 5.02534500  | 4.01426000  | H | 4.72115100  | 0.06595200  | 3.24249400  |
| C                          | 1.64053600  | 2.47522900  | -1.56501400 | C | 3.29158600  | 1.40095800  | 2.38063500  |
| C                          | 0.70894200  | 3.48205400  | -1.24663100 | O | 2.83178700  | 2.16187900  | 3.25853800  |
| C                          | 1.85697800  | 2.17012100  | -2.92269000 | H | 3.86637800  | 1.82011900  | 1.52301700  |
| C                          | 0.03305800  | 4.17657100  | -2.25491300 | S | 5.16949700  | -1.34135400 | 0.91600500  |
| H                          | 0.49923900  | 3.72984000  | -0.20372300 | O | 6.25788400  | -1.31855100 | 1.90726500  |
| C                          | 1.17915300  | 2.86597900  | -3.92869800 | O | 4.92676900  | -2.56635100 | 0.13326300  |
| H                          | 2.55436500  | 1.38085300  | -3.21054000 | C | 5.49195700  | -0.01711100 | -0.24814400 |
| C                          | 0.26735100  | 3.87407700  | -3.60001400 | C | 6.40650000  | 0.98551000  | 0.08486100  |
| H                          | -0.68655100 | 4.95267900  | -1.98248900 | C | 4.82236200  | -0.00111900 | -1.47896000 |
| H                          | 1.36757200  | 2.61589100  | -4.97642900 | C | 6.64044100  | 2.02157400  | -0.82298400 |
| H                          | -0.26060200 | 4.41828200  | -4.38767000 | H | 6.93689700  | 0.95516700  | 1.03796700  |
| <b>TS-L3-endo(Y-shape)</b> |             |             |             |   |             |             |             |
| P                          | -1.18445500 | -2.12310700 | -0.17113900 | C | 5.06810800  | 1.04151500  | -2.37009300 |
| P                          | -1.95334600 | 1.92681700  | -0.02672700 | H | 4.12591400  | -0.79766100 | -1.74613400 |
| C                          | -3.75041300 | 1.60138800  | -0.38860300 | C | 5.97686100  | 2.07158100  | -2.05935000 |
| C                          | -4.41400800 | 0.64336400  | 0.40140600  | H | 7.35801700  | 2.80460000  | -0.56373400 |
| C                          | -4.48575000 | 2.23280500  | -1.40924100 | H | 4.54849500  | 1.05359500  | -3.33237600 |
| C                          | -5.76464300 | 0.34448700  | 0.20043900  | H | 1.27632800  | 1.88837000  | 0.87131000  |
| H                          | -3.86436400 | 0.11361300  | 1.18053100  | C | 6.22972900  | 3.18525900  | -3.04042700 |
| C                          | -5.83525600 | 1.92613500  | -1.61992500 | H | 6.94134900  | 3.92331300  | -2.64260500 |
| H                          | -4.02052100 | 2.97166500  | -2.06129100 | H | 6.63715400  | 2.79104600  | -3.98695100 |
| C                          | -6.48265200 | 0.98620100  | -0.81365400 | H | 5.29283900  | 3.71018100  | -3.29197100 |
| H                          | -6.25347100 | -0.40132000 | 0.83338300  | C | 0.08757900  | -3.24780200 | -0.99927900 |
| H                          | -6.38113200 | 2.43042800  | -2.42226600 | C | -0.40777900 | -4.65968000 | -1.36181200 |
| H                          | -7.53741300 | 0.74990600  | -0.97861900 | C | 0.74074100  | -2.57220100 | -2.21951200 |
| C                          | -2.59388600 | -2.17242800 | -1.37675200 | H | 0.86349000  | -3.35034600 | -0.22231000 |
| C                          | -3.61734600 | -3.13780000 | -1.34275400 | C | 0.72843400  | -5.51708100 | -1.94337800 |
| C                          | -2.61097000 | -1.21974500 | -2.41176100 | H | -1.21963100 | -4.58504700 | -2.10615900 |
| C                          | -4.62603400 | -3.14457200 | -2.31232600 | H | -0.83235800 | -5.16557000 | -0.48021100 |
| H                          | -3.63946600 | -3.89923900 | -0.56117400 | C | 1.87589400  | -3.43090600 | -2.79709000 |
| C                          | -3.60965600 | -1.23617000 | -3.39034300 | H | -0.02202100 | -2.41247600 | -3.00254100 |
| H                          | -1.83466200 | -0.45114000 | -2.44842400 | H | 1.12021800  | -1.57464500 | -1.94336100 |
| C                          | -4.62398900 | -2.19752300 | -3.34109800 | C | 1.39581500  | -4.84379000 | -3.14710300 |
| H                          | -5.41558700 | -3.89967400 | -2.26320000 | H | 0.33487600  | -6.50862000 | -2.22664300 |
| H                          | -3.59898200 | -0.48872500 | -4.18830200 | H | 1.48663100  | -5.69468900 | -1.15834300 |
| H                          | -5.41189200 | -2.20667100 | -4.09922500 | H | 2.29827700  | -2.93653800 | -3.68892000 |
| Pd                         | -0.37155700 | 0.02103500  | 0.35082400  | H | 2.69593300  | -3.49647400 | -2.05814300 |
| C                          | 1.56242800  | -0.35147100 | 0.91419800  | H | 2.23883600  | -5.45659200 | -3.51021200 |
| C                          | 1.73005800  | 0.92066600  | 1.07300600  | H | 0.66982200  | -4.78498200 | -3.97948300 |
| C                          | 2.46477300  | -1.49825900 | 1.22704400  | C | -1.78064200 | -3.13125800 | 1.30109700  |
| H                          | 1.99991600  | -2.15082200 | 1.98555500  | C | -0.63595300 | -3.47251900 | 2.27541800  |
| H                          | 2.63570300  | -2.12761300 | 0.34482300  | C | -2.92674600 | -2.43108300 | 2.05618900  |
| N                          | 3.75908900  | -1.03464700 | 1.74751700  | H | -2.16571000 | -4.08100400 | 0.89346900  |
| C                          | 3.71965900  | -0.01637700 | 2.79019600  | C | -1.13616100 | -4.31969600 | 3.45524600  |
| H                          | 3.03567500  | -0.35650600 | 3.58582300  | H | -0.20005900 | -2.53447600 | 2.66247400  |
|                            |             |             |             | H | 0.17363100  | -4.00988800 | 1.75792900  |

|                            |             |             |             |    |             |             |             |
|----------------------------|-------------|-------------|-------------|----|-------------|-------------|-------------|
| C                          | -3.42731800 | -3.27588700 | 3.23680500  | P  | -1.87862900 | -2.21541100 | 0.00807800  |
| H                          | -2.56330100 | -1.45784700 | 2.43189400  | Pd | -1.12160800 | 0.08765700  | 0.21018300  |
| H                          | -3.76340000 | -2.21445600 | 1.37491600  | C  | -0.86193100 | 2.77368100  | -2.14225300 |
| C                          | -2.29156500 | -3.64109000 | 4.19790800  | C  | 0.54166900  | 2.30078800  | -2.57050200 |
| H                          | -0.29899000 | -4.51919100 | 4.14605500  | C  | -1.94121500 | 2.13260300  | -3.03832500 |
| H                          | -1.47143700 | -5.30377600 | 3.07858400  | H  | -0.91874900 | 3.86680100  | -2.27891400 |
| H                          | -4.22338200 | -2.72919700 | 3.77100200  | C  | 0.80568200  | 2.57149500  | -4.05843100 |
| H                          | -3.89072100 | -4.20222700 | 2.84943600  | H  | 0.62518000  | 1.21621300  | -2.37847200 |
| H                          | -2.66559600 | -4.29428600 | 5.00506900  | H  | 1.31852800  | 2.78754900  | -1.95953900 |
| H                          | -1.91903000 | -2.72131700 | 4.68608800  | C  | -1.67123400 | 2.39555900  | -4.52751600 |
| C                          | -1.39691400 | 2.94839200  | -1.52274400 | H  | -1.96215800 | 1.04251200  | -2.85566400 |
| C                          | -1.78645800 | 4.44106400  | -1.53716300 | H  | -2.94092900 | 2.51382700  | -2.77728900 |
| C                          | 0.10900400  | 2.79302000  | -1.81963400 | C  | -0.27022000 | 1.94019000  | -4.94789500 |
| H                          | -1.92931000 | 2.44867400  | -2.35179000 | H  | 1.80460400  | 2.19049300  | -4.33241400 |
| C                          | -1.41621800 | 5.09930200  | -2.87570500 | H  | 0.82934700  | 3.66337400  | -4.23207300 |
| H                          | -1.25286200 | 4.96609100  | -0.72747900 | H  | -2.43985100 | 1.88878400  | -5.13617500 |
| H                          | -2.86022100 | 4.57906300  | -1.33889300 | H  | -1.77796700 | 3.47767500  | -4.72866200 |
| C                          | 0.48730300  | 3.45544100  | -3.15248400 | H  | -0.08815700 | 2.18885800  | -6.00764700 |
| H                          | 0.69836900  | 3.25168100  | -1.00634300 | H  | -0.20649300 | 0.83882300  | -4.86911000 |
| H                          | 0.38139100  | 1.72474600  | -1.83768200 | C  | -2.89719100 | 3.12467500  | -0.00290700 |
| C                          | 0.07230400  | 4.93018700  | -3.19855200 | C  | -3.32384100 | 2.94241500  | 1.46632600  |
| H                          | -1.68389000 | 6.16977700  | -2.84839600 | C  | -3.10380300 | 4.58137000  | -0.45392800 |
| H                          | -2.02020600 | 4.64661300  | -3.68392800 | H  | -3.54625400 | 2.47476100  | -0.61686600 |
| H                          | 1.57360500  | 3.35624500  | -3.32121200 | C  | -4.77146300 | 3.40239500  | 1.69309300  |
| H                          | -0.00834000 | 2.91171900  | -3.97829500 | H  | -2.65580600 | 3.53094000  | 2.11972400  |
| H                          | 0.30247000  | 5.36294700  | -4.18747200 | H  | -3.20760000 | 1.88732300  | 1.76594900  |
| H                          | 0.66955100  | 5.49885100  | -2.46155500 | C  | -4.55142700 | 5.04236300  | -0.21957100 |
| C                          | -2.07235400 | 3.16512000  | 1.40887800  | H  | -2.41940900 | 5.23861600  | 0.11106400  |
| C                          | -2.80010600 | 2.59287600  | 2.64052900  | H  | -2.84994100 | 4.70174400  | -1.51883600 |
| C                          | -0.69079500 | 3.70293600  | 1.82906300  | C  | -4.98481800 | 4.85017600  | 1.23743100  |
| H                          | -2.67389800 | 4.00475700  | 1.02000800  | H  | -5.03292400 | 3.29199100  | 2.75962200  |
| C                          | -2.91038900 | 3.63452600  | 3.76533400  | H  | -5.45577000 | 2.73878700  | 1.13249500  |
| H                          | -2.24794900 | 1.70930200  | 3.01078100  | H  | -4.65526000 | 6.10055000  | -0.51579600 |
| H                          | -3.80948100 | 2.24741100  | 2.37303700  | H  | -5.22604800 | 4.46585400  | -0.87942900 |
| C                          | -0.80461900 | 4.75870800  | 2.93868500  | H  | -6.04192200 | 5.14080600  | 1.36472300  |
| H                          | -0.07747000 | 2.86777100  | 2.20621500  | H  | -4.39426100 | 5.52521500  | 1.88462200  |
| H                          | -0.15081600 | 4.12510200  | 0.96780700  | C  | -3.57064800 | -2.40458800 | 0.80171900  |
| C                          | -1.54663600 | 4.20905200  | 4.16076300  | C  | -3.51423500 | -2.02426200 | 2.29559400  |
| H                          | -3.40523100 | 3.17959000  | 4.64083100  | C  | -4.63627600 | -1.56243400 | 0.07156900  |
| H                          | -3.56819700 | 4.45724300  | 3.42852800  | H  | -3.86651000 | -3.46406700 | 0.72066800  |
| H                          | 0.20562000  | 5.09963600  | 3.22375400  | C  | -4.88904200 | -2.14587700 | 2.96722100  |
| H                          | -1.33865700 | 5.64567300  | 2.55023000  | H  | -3.15574800 | -0.98219700 | 2.38264800  |
| H                          | -1.66849400 | 4.99593500  | 4.92514300  | H  | -2.78024500 | -2.65067400 | 2.82750600  |
| H                          | -0.93649100 | 3.41232900  | 4.62539500  | C  | -6.00998800 | -1.67656200 | 0.74957400  |
| <b>TS-L3-endo(T-shape)</b> |             |             |             | H  | -4.31743100 | -0.50366000 | 0.06237200  |
| P                          | -1.17452500 | 2.41549600  | -0.32302800 | H  | -4.72272200 | -1.87285500 | -0.98165900 |

|   |             |             |             |                            |             |             |             |
|---|-------------|-------------|-------------|----------------------------|-------------|-------------|-------------|
| C | -5.95051600 | -1.31592700 | 2.23759000  | H                          | 3.15090200  | 1.42492800  | 2.45826500  |
| H | -4.81476500 | -1.83378700 | 4.02318500  | H                          | 4.47234000  | 0.26535600  | 2.63392600  |
| H | -5.19755800 | -3.20781800 | 2.97637600  | H                          | 1.79250200  | -0.27085900 | -0.54200200 |
| H | -6.73504100 | -1.03025800 | 0.22546300  | H                          | 1.89694900  | 1.32926900  | 0.20555600  |
| H | -6.38085300 | -2.71267100 | 0.64086600  | C                          | 9.24016200  | 1.24568400  | -1.44921300 |
| H | -6.93961300 | -1.45902200 | 2.70588600  | H                          | 10.06954800 | 1.09513800  | -0.74296900 |
| H | -5.70706000 | -0.24220400 | 2.34248200  | H                          | 9.54411400  | 0.83726200  | -2.42807000 |
| C | -2.12884100 | -2.76813600 | -1.77943300 | H                          | 9.09739900  | 2.33050500  | -1.58835300 |
| C | -0.82326800 | -2.66111700 | -2.59023600 | C                          | -0.06625000 | 3.59536500  | 0.58424600  |
| C | -2.77491700 | -4.15202500 | -1.96591600 | C                          | 0.51101900  | 4.73811500  | -0.00090800 |
| H | -2.82303400 | -2.00350100 | -2.17258800 | C                          | 0.19034100  | 3.34353800  | 1.94585000  |
| C | -1.05499300 | -2.97754300 | -4.07484800 | C                          | 1.32052900  | 5.59661300  | 0.75104800  |
| H | -0.07853000 | -3.36909300 | -2.18515600 | H                          | 0.33437600  | 4.97355700  | -1.05180500 |
| H | -0.39165200 | -1.65240600 | -2.47847500 | C                          | 0.99211800  | 4.20693200  | 2.69984800  |
| C | -3.00121100 | -4.46991900 | -3.45289200 | H                          | -0.23293600 | 2.45654000  | 2.42081400  |
| H | -2.11717900 | -4.92344600 | -1.52783800 | C                          | 1.56323800  | 5.33551500  | 2.10329700  |
| H | -3.73416900 | -4.21243200 | -1.42740300 | H                          | 1.76159400  | 6.47654400  | 0.27444700  |
| C | -1.70836600 | -4.35082100 | -4.26689700 | H                          | 1.17682800  | 3.98819500  | 3.75521200  |
| H | -0.09622900 | -2.92834800 | -4.61933600 | H                          | 2.19654800  | 6.00759500  | 2.68883700  |
| H | -1.70535300 | -2.19877100 | -4.51484100 | C                          | -0.86831700 | -3.58907200 | 0.73896300  |
| H | -3.42766900 | -5.48289800 | -3.55458200 | C                          | 0.53259300  | -3.50266600 | 0.63848400  |
| H | -3.75484400 | -3.77151900 | -3.86179400 | C                          | -1.41935200 | -4.72085200 | 1.36926400  |
| H | -1.91058900 | -4.53349800 | -5.33643600 | C                          | 1.35870300  | -4.51133900 | 1.14434200  |
| H | -1.00132700 | -5.13735000 | -3.94321700 | H                          | 0.99132100  | -2.63692100 | 0.16039900  |
| C | 0.70430200  | -0.06110300 | 1.31402700  | C                          | -0.59353500 | -5.72703100 | 1.88297600  |
| C | 0.59810100  | -0.34688300 | 2.55015600  | H                          | -2.50065700 | -4.83386400 | 1.46536300  |
| C | 1.87291500  | 0.24760200  | 0.41991300  | C                          | 0.79719500  | -5.62683900 | 1.77278500  |
| N | 3.14065200  | -0.13186400 | 1.05812100  | H                          | 2.44332100  | -4.40806100 | 1.05674900  |
| C | 3.39439500  | 0.35170700  | 2.40729900  | H                          | -1.04378300 | -6.59580900 | 2.37140300  |
| C | 2.65342000  | -0.37679600 | 3.52919100  | H                          | 1.43976700  | -6.41339400 | 2.17794100  |
| O | 2.54333800  | 0.14986700  | 4.64230500  | <b>TS-L4-endo(Y-shape)</b> |             |             |             |
| H | 2.59363600  | -1.48156600 | 3.40262700  | P                          | -0.86628700 | 2.30220600  | 0.08732000  |
| S | 4.07709100  | -1.37455300 | 0.46314000  | P                          | -2.00968100 | -1.81475000 | -0.07102900 |
| O | 4.42644900  | -2.28989400 | 1.56735000  | Pd                         | -0.26026500 | 0.02959000  | -0.29214900 |
| O | 3.38349200  | -1.91503100 | -0.72105900 | C                          | -1.48053800 | 3.10242100  | -1.51020200 |
| C | 5.59878200  | -0.61435800 | -0.08905600 | C                          | -0.34868000 | 3.30328400  | -2.53986300 |
| C | 6.76111400  | -0.75245900 | 0.67212700  | C                          | -2.62154100 | 2.29192400  | -2.15776200 |
| C | 5.60053300  | 0.11058700  | -1.28899800 | H                          | -1.87086100 | 4.09662900  | -1.23208200 |
| C | 7.93896000  | -0.14439700 | 0.22732900  | C                          | -0.86243800 | 3.97033300  | -3.82534900 |
| H | 6.75082500  | -1.33399800 | 1.59519300  | H                          | 0.08711400  | 2.31952300  | -2.79084400 |
| C | 6.78412700  | 0.70693900  | -1.71476800 | H                          | 0.46640400  | 3.91200600  | -2.12149600 |
| H | 4.69097000  | 0.20371400  | -1.88636700 | C                          | -3.14397400 | 2.96060400  | -3.43755600 |
| C | 7.97253500  | 0.59324900  | -0.96576900 | H                          | -2.24089100 | 1.28389800  | -2.40248500 |
| H | 8.85016900  | -0.25162600 | 0.82180800  | H                          | -3.45028000 | 2.14753200  | -1.45132500 |
| H | 6.79029300  | 1.27174900  | -2.65128200 | C                          | -2.02248200 | 3.19293700  | -4.45437000 |
| H | -0.09222500 | -0.58973600 | 3.35084600  | H                          | -0.03145800 | 4.07064500  | -4.54484200 |

|   |             |             |             |   |             |             |             |
|---|-------------|-------------|-------------|---|-------------|-------------|-------------|
| H | -1.19655600 | 4.99794700  | -3.59012500 | C | -0.05296600 | -5.53959200 | -0.93388200 |
| H | -3.94203700 | 2.33985300  | -3.88028900 | H | 0.54507300  | -3.61798900 | -0.14587500 |
| H | -3.61022000 | 3.92939700  | -3.17816000 | H | -0.64308000 | -4.45901300 | 0.84248500  |
| H | -2.40804500 | 3.72725600  | -5.33990100 | C | 0.27098500  | -5.31011100 | -2.41324800 |
| H | -1.65163200 | 2.21540000  | -4.81484800 | H | -0.59337300 | -4.33444100 | -4.15856800 |
| C | -2.10576100 | 2.78562200  | 1.45746800  | H | -1.76805200 | -5.17393000 | -3.13473000 |
| C | -3.50749100 | 3.25755700  | 1.02810800  | H | 0.78650100  | -6.04879400 | -0.42940700 |
| C | -2.21004400 | 1.69843400  | 2.54321000  | H | -0.92239000 | -6.21852800 | -0.85333500 |
| H | -1.62178900 | 3.65774200  | 1.92548400  | H | 0.45159900  | -6.27410300 | -2.91986600 |
| C | -4.31404800 | 3.75235700  | 2.23976300  | H | 1.20599300  | -4.72743800 | -2.49944100 |
| H | -4.05777200 | 2.43052800  | 0.55160900  | C | -2.41460500 | -2.23118100 | 1.72574000  |
| H | -3.43717800 | 4.06485100  | 0.28303700  | C | -3.21757800 | -3.51722500 | 2.00286300  |
| C | -3.02595700 | 2.18454300  | 3.75045400  | C | -1.16081800 | -2.15512000 | 2.62503100  |
| H | -2.68874400 | 0.80286900  | 2.11470100  | H | -3.05336500 | -1.37868900 | 2.01547700  |
| H | -1.20588700 | 1.38680300  | 2.87216400  | C | -3.56314200 | -3.65375700 | 3.49494300  |
| C | -4.41348500 | 2.68585200  | 3.33563300  | H | -2.63522000 | -4.40037100 | 1.68969200  |
| H | -5.32171200 | 4.06143700  | 1.91176500  | H | -4.14495600 | -3.52824600 | 1.41129100  |
| H | -3.82973800 | 4.65635600  | 2.65362500  | C | -1.52056000 | -2.29717800 | 4.11085000  |
| H | -3.11710300 | 1.37141700  | 4.49130000  | H | -0.45161300 | -2.95461500 | 2.35224800  |
| H | -2.47808400 | 3.00335200  | 4.25302000  | H | -0.63493500 | -1.20174400 | 2.45023100  |
| H | -4.95524100 | 3.08459200  | 4.21076900  | C | -2.31699100 | -3.57796800 | 4.38322900  |
| H | -5.01087600 | 1.83420900  | 2.96029300  | H | -4.10042500 | -4.60284100 | 3.66582400  |
| C | 0.59393400  | 3.40084300  | 0.57770600  | H | -4.26132300 | -2.84473900 | 3.78014600  |
| C | 0.31992900  | 4.91833600  | 0.62368700  | H | -0.60055700 | -2.27891500 | 4.72054700  |
| C | 1.24859600  | 2.93081500  | 1.89225500  | H | -2.12086200 | -1.42314000 | 4.42497300  |
| H | 1.32146100  | 3.22946600  | -0.22922800 | H | -2.60133700 | -3.63427200 | 5.44830300  |
| C | 1.60373200  | 5.70626800  | 0.93301800  | H | -1.67395200 | -4.45582700 | 4.18450900  |
| H | -0.42790400 | 5.14617500  | 1.40291100  | C | -3.68732600 | -1.47601300 | -0.91187200 |
| H | -0.10413800 | 5.27026200  | -0.32966200 | C | -4.55053800 | -2.67346300 | -1.36176700 |
| C | 2.52683700  | 3.72425100  | 2.20393500  | C | -4.54326300 | -0.49440900 | -0.09062400 |
| H | 0.53769900  | 3.06212800  | 2.72733500  | H | -3.37260400 | -0.94254700 | -1.82716400 |
| H | 1.47384000  | 1.85264000  | 1.84001500  | C | -5.79249300 | -2.20481200 | -2.13836700 |
| C | 2.26513400  | 5.23411900  | 2.23193300  | H | -4.87608900 | -3.25435700 | -0.48247000 |
| H | 1.37163700  | 6.78395300  | 0.98936700  | H | -3.97667100 | -3.36168400 | -1.99864700 |
| H | 2.31564100  | 5.58375900  | 0.09586100  | C | -5.78336600 | -0.02537400 | -0.86495400 |
| H | 2.94606000  | 3.38913600  | 3.16852600  | H | -4.87651700 | -0.98581000 | 0.84029200  |
| H | 3.29147800  | 3.50162400  | 1.43752600  | H | -3.93943700 | 0.37330000  | 0.21180600  |
| H | 3.20668600  | 5.78344700  | 2.40475400  | C | -6.63468800 | -1.20838700 | -1.33629300 |
| H | 1.60233700  | 5.47308900  | 3.08470400  | H | -6.40053300 | -3.08084900 | -2.42367000 |
| C | -1.50545500 | -3.44831000 | -0.89335200 | H | -5.46864800 | -1.72971100 | -3.08315300 |
| C | -1.17317200 | -3.22561500 | -2.38509400 | H | -6.38241000 | 0.65205400  | -0.23186800 |
| C | -0.37197300 | -4.22815300 | -0.19738700 | H | -5.46423000 | 0.56630700  | -1.74231400 |
| H | -2.40286400 | -4.08634200 | -0.83792500 | H | -7.48851000 | -0.85318900 | -1.93892300 |
| C | -0.85939900 | -4.54387600 | -3.10798100 | H | -7.06484700 | -1.72108600 | -0.45562000 |
| H | -0.29730300 | -2.55969100 | -2.46791200 | C | 1.71656800  | 0.20698200  | -0.84903400 |
| H | -2.00192700 | -2.71081300 | -2.89719600 | C | 1.74523600  | -1.07737800 | -0.97289900 |

|                            |             |             |             |   |             |             |             |
|----------------------------|-------------|-------------|-------------|---|-------------|-------------|-------------|
| C                          | 2.74060000  | 1.23713700  | -1.19676000 | H | -0.89642000 | -4.20422300 | -3.55623600 |
| H                          | 2.34694700  | 1.91560700  | -1.97322800 | H | -3.11442900 | -4.80263600 | -2.61855300 |
| H                          | 2.98378200  | 1.86693700  | -0.33270900 | H | -3.09069100 | -3.38023800 | -1.56664900 |
| N                          | 3.97735200  | 0.62321900  | -1.70308400 | C | 3.16302100  | -2.72510700 | -1.32791800 |
| C                          | 3.83690600  | -0.41602000 | -2.71457300 | C | 2.99432400  | -2.24132000 | -2.78284000 |
| H                          | 3.18342000  | -0.03728900 | -3.51819600 | C | 4.46399400  | -2.16123100 | -0.72356300 |
| H                          | 4.82409600  | -0.60398600 | -3.16672900 | H | 3.24147300  | -3.82670700 | -1.34830000 |
| C                          | 3.28538200  | -1.77222200 | -2.26019500 | C | 4.23260100  | -2.53469400 | -3.64380300 |
| O                          | 2.76305200  | -2.51971200 | -3.11288000 | H | 2.79642400  | -1.15346400 | -2.78515200 |
| H                          | 3.79734900  | -2.20545000 | -1.37212100 | H | 2.12228300  | -2.72120900 | -3.24955400 |
| S                          | 5.41198100  | 0.81884300  | -0.87870700 | C | 5.69273700  | -2.45924900 | -1.59583500 |
| O                          | 6.49167100  | 0.57463000  | -1.84947700 | H | 4.36250600  | -1.06857500 | -0.60085200 |
| O                          | 5.32557900  | 2.12625200  | -0.20519700 | H | 4.63217600  | -2.57394600 | 0.28078500  |
| C                          | 5.55734000  | -0.43123700 | 0.39768000  | C | 5.51162500  | -1.95984200 | -3.03107300 |
| C                          | 6.28203700  | -1.60072200 | 0.13661900  | H | 4.07523500  | -2.13414800 | -4.66026900 |
| C                          | 4.94066600  | -0.22932400 | 1.63638300  | H | 4.34444700  | -3.62941700 | -3.75455500 |
| C                          | 6.37307300  | -2.57756400 | 1.12697600  | H | 6.58768200  | -2.00441000 | -1.13693800 |
| H                          | 6.77577600  | -1.74081800 | -0.82647000 | H | 5.87125300  | -3.55066800 | -1.61088500 |
| C                          | 5.04178300  | -1.22095400 | 2.61471300  | H | 6.38810000  | -2.22641000 | -3.64675500 |
| H                          | 4.39634000  | 0.69300200  | 1.84608800  | H | 5.45324600  | -0.85536700 | -3.02970100 |
| C                          | 5.75321300  | -2.40939000 | 2.37920000  | C | 1.96551100  | -3.29156900 | 1.35887300  |
| H                          | 6.94153800  | -3.48988100 | 0.92488600  | C | 2.55483500  | -4.70870200 | 1.22281900  |
| H                          | 4.56164300  | -1.06309200 | 3.58415400  | C | 2.76174400  | -2.47793000 | 2.40186400  |
| H                          | 1.19053100  | -1.98707500 | -0.76102500 | H | 0.94525000  | -3.38779100 | 1.76948900  |
| C                          | 5.86727500  | -3.47623500 | 3.43549200  | C | 2.58536000  | -5.43038100 | 2.57990200  |
| H                          | 6.91942700  | -3.62375600 | 3.73345700  | H | 3.58495600  | -4.64169100 | 0.83199000  |
| H                          | 5.29025700  | -3.21970400 | 4.33580700  | H | 1.98335300  | -5.30765500 | 0.49549200  |
| H                          | 5.50497000  | -4.44691000 | 3.05764300  | C | 2.77884200  | -3.19555100 | 3.75972700  |
| <b>TS-L4-endo(T-shape)</b> |             |             |             | H | 3.80144600  | -2.33811400 | 2.06388700  |
| P                          | 1.64170300  | -2.35958900 | -0.25194500 | H | 2.33047800  | -1.46973000 | 2.50609900  |
| P                          | 1.13041700  | 2.37845000  | -0.10581200 | C | 3.33709600  | -4.61910000 | 3.64168000  |
| Pd                         | 1.09989900  | -0.03667600 | 0.12849800  | H | 3.04543600  | -6.42699600 | 2.46237300  |
| C                          | 0.31531800  | -3.41119600 | -1.12300600 | H | 1.54779900  | -5.60378200 | 2.92075300  |
| C                          | -0.70222200 | -4.08401000 | -0.17831900 | H | 3.37178400  | -2.61085100 | 4.48437200  |
| C                          | -0.44654500 | -2.58636700 | -2.18442000 | H | 1.74916500  | -3.23974600 | 4.16086700  |
| H                          | 0.87144200  | -4.21307500 | -1.64195300 | H | 3.29093300  | -5.13180300 | 4.61809900  |
| C                          | -1.71776100 | -4.93835900 | -0.95459600 | H | 4.40736500  | -4.56640900 | 3.36718800  |
| H                          | -1.23934800 | -3.30797300 | 0.39607600  | C | 0.81614600  | 3.43914300  | 1.41999000  |
| H                          | -0.19626400 | -4.72558400 | 0.55681700  | C | -0.65981600 | 3.44337400  | 1.86519600  |
| C                          | -1.44739400 | -3.44409700 | -2.97145900 | C | 1.72892400  | 2.99787900  | 2.58346300  |
| H                          | -0.98954700 | -1.77356400 | -1.67317200 | H | 1.08387900  | 4.47381000  | 1.14730700  |
| H                          | 0.24769700  | -2.09487000 | -2.88054200 | C | -0.86878900 | 4.30156800  | 3.12220800  |
| C                          | -2.44462000 | -4.14155300 | -2.04168600 | H | -0.98626200 | 2.41195000  | 2.07736200  |
| H                          | -2.44394800 | -5.37755600 | -0.24877100 | H | -1.31015200 | 3.81707800  | 1.06038900  |
| H                          | -1.18594600 | -5.78788100 | -1.42218000 | C | 1.51209100  | 3.85401200  | 3.83961300  |
| H                          | -1.98013500 | -2.81357800 | -3.70431800 | H | 1.51970800  | 1.93968600  | 2.82173500  |

H 2.78745000 3.04442300 2.28212000  
C 0.04272600 3.86432200 4.27348800  
H -1.92795500 4.25157900 3.42908600  
H -0.66400700 5.36081300 2.87818200  
H 2.15325800 3.48224300 4.65766900  
H 1.83857600 4.89057600 3.63405300  
H -0.09605600 4.52540600 5.14653100  
H -0.24718900 2.84824100 4.60015000  
C 2.80059600 2.97750900 -0.77978100  
C 3.20878100 4.43151200 -0.46791300  
C 3.95163300 2.02026800 -0.41222300  
H 2.65307400 2.89717200 -1.87242800  
C 4.50869200 4.81313500 -1.19492100  
H 3.36753500 4.54370200 0.61828500  
H 2.41174500 5.13699300 -0.74342800  
C 5.25623900 2.39782700 -1.12745200  
H 4.11543500 2.04257900 0.68029800  
H 3.66631800 0.98487600 -0.65957500  
C 5.65448100 3.85310100 -0.85743200  
H 4.78762800 5.84930100 -0.93569400  
H 4.33119100 4.80149900 -2.28648100  
H 6.06484000 1.71363100 -0.81667600  
H 5.12528900 2.25276000 -2.21620200  
H 6.55941000 4.11736100 -1.43164800  
H 5.91829800 3.96520700 0.21086100  
C -0.13093200 2.99134400 -1.36691900  
C -0.15121300 4.50099800 -1.67086500  
C -0.05993300 2.18170800 -2.67768900  
H -1.09198300 2.73830900 -0.88606200  
C -1.31302900 4.86232600 -2.61010800  
H 0.79667900 4.79255700 -2.15476900  
H -0.22800700 5.08759700 -0.74176500  
C -1.20495100 2.55061300 -3.63281500  
H 0.90527800 2.37425700 -3.18103100  
H -0.08450000 1.10194600 -2.45455400  
C -1.25752300 4.05667100 -3.91262200  
H -1.29494900 5.94459700 -2.82677300  
H -2.27112600 4.66121700 -2.09593400  
H -1.09942100 1.98788700 -4.57655200  
H -2.16401900 2.23203900 -3.18404500  
H -2.12485700 4.29749300 -4.55147000  
H -0.35730200 4.35228400 -4.48349700  
C -0.64058300 -0.28422800 1.42473000  
C -0.42400100 -0.55682500 2.64511400  
C -1.88191700 -0.07173600 0.60695000  
N -3.03722800 0.16861200 1.49008600

C -3.35192900 -0.86949800 2.46412900  
C -2.55958900 -0.75188500 3.75859200  
O -2.46329800 -1.69616200 4.53768000  
H -2.35367700 0.29662900 4.07546200  
S -4.27711500 1.15141000 0.94534300  
O -5.10030400 1.47197000 2.12195900  
O -3.64595000 2.24333500 0.18372100  
C -5.29504800 0.21687100 -0.19304200  
C -6.45313500 -0.41263300 0.27308300  
C -4.90954800 0.11299700 -1.53687400  
C -7.22438000 -1.16258800 -0.61832300  
H -6.76006500 -0.30788000 1.31496700  
C -5.69240900 -0.64058700 -2.40931200  
H -4.01761700 0.62508300 -1.90219800  
C -6.85997000 -1.29257300 -1.96811200  
H -8.13247000 -1.65121400 -0.25512300  
H -5.39615900 -0.71840100 -3.45918300  
H 0.29849000 -0.74372300 3.42963100  
H -3.21691700 -1.87982200 2.04130300  
H -4.40914900 -0.77964700 2.76477600  
H -1.76810700 0.78943300 -0.05993900  
H -2.06363500 -0.95875200 -0.02594000  
C -7.69316000 -2.09496200 -2.93168100  
H -8.55348400 -2.56400300 -2.43264200  
H -8.07505000 -1.45695200 -3.74677300  
H -7.09299600 -2.88998400 -3.40517300

**TS-endo-1d**

P 2.14974700 0.68701300 -0.03867900  
P -0.98037700 -1.56719300 0.12457900  
C -0.40012200 -2.41194300 -1.41310300  
C -0.71473500 -1.79487400 -2.63995500  
C 0.35655800 -3.59449300 -1.42525800  
C -0.30723800 -2.36354900 -3.84871700  
H -1.28308100 -0.86056500 -2.65092500  
C 0.77435600 -4.15528300 -2.63833800  
H 0.63178000 -4.08722000 -0.49190900  
C 0.43965600 -3.54734300 -3.85108700  
H -0.56735800 -1.87506100 -4.79164400  
H 1.36618200 -5.07447400 -2.62987900  
H 0.76551300 -3.98959300 -4.79638100  
C -0.30751500 -2.52803000 1.55858200  
C -0.66489000 -3.87307900 1.77404100  
C 0.51526500 -1.88667000 2.49741600  
C -0.18495000 -4.56287300 2.88996200  
H -1.32797200 -4.38668700 1.07391700  
C 0.98763100 -2.57645000 3.62031600

H 0.77946100 -0.83668400 2.35369200  
C 0.64321700 -3.91636200 3.81557500  
H -0.46621500 -5.60850400 3.04183300  
H 1.62325100 -2.05989400 4.34450200  
H 1.01124200 -4.45628500 4.69228900  
C -2.77009100 -2.03857000 0.24974700  
C -3.43757600 -2.81733100 -0.70804100  
C -3.48264500 -1.58497300 1.37541200  
C -4.79177900 -3.13533800 -0.54225200  
H -2.90908700 -3.18468900 -1.58970700  
C -4.82942000 -1.91144300 1.54288400  
H -2.98214200 -0.97012700 2.12934600  
C -5.49023900 -2.68618000 0.58139000  
H -5.29824900 -3.74331500 -1.29701600  
H -5.36776200 -1.55416100 2.42498600  
H -6.54654200 -2.93757100 0.70949900  
C 2.57535000 2.01747200 -1.25988600  
C 3.75030500 2.78532700 -1.18852500  
C 1.66646100 2.26446300 -2.30484600  
C 4.00836100 3.77550000 -2.14191700  
H 4.47164500 2.62007200 -0.38588900  
C 1.93101200 3.24806900 -3.26323900  
H 0.74248400 1.68227700 -2.36604900  
C 3.10193400 4.00832800 -3.18175500  
H 4.92420600 4.36853200 -2.06972200  
H 1.21517500 3.42446400 -4.07064000  
H 3.30610100 4.78404200 -3.92478300  
C 3.10485100 -0.77320300 -0.66285900  
C 3.48575900 -0.88197700 -2.01121300  
C 3.39445100 -1.84119500 0.20794600  
C 4.14965900 -2.02386700 -2.47371600  
H 3.27084900 -0.07305100 -2.71235000  
C 4.06574300 -2.97592600 -0.25489700  
H 3.10654700 -1.78739900 1.25983400  
C 4.44644700 -3.07190300 -1.59806000  
H 4.44074500 -2.08775600 -3.52577200  
H 4.29124800 -3.78969900 0.43981900  
H 4.97178400 -3.96002800 -1.95944700  
C 3.05430500 1.17605200 1.49968500  
C 4.42802700 0.94473300 1.69811700  
C 2.32529600 1.82993300 2.50867100  
C 5.05443200 1.36456600 2.87551700  
H 5.01774200 0.43362100 0.93427700  
C 2.95474100 2.25395800 3.68365500  
H 1.25423800 2.00517800 2.37503700  
C 4.32065200 2.02103000 3.86982100

H 6.12274400 1.17784500 3.01521000  
H 2.37246500 2.76150400 4.45738400  
H 4.81319400 2.34653900 4.79013800  
Pd -0.32032800 0.67473300 0.13298800  
C -1.96333200 1.90559400 0.11877200  
C -1.16016400 2.88604400 0.42986700  
C -3.39222300 4.19473500 1.01865500  
C -2.06075100 4.66471700 0.40755800  
O -1.36618400 5.50706400 1.02924800  
H -2.08830800 4.70058400 -0.71200600  
H -0.11906600 3.04228300 0.72659200  
H -3.17852200 3.87246400 2.05445700  
H -4.03569500 5.08884400 1.08915600  
C -4.10254300 3.11834500 0.24075600  
C -3.38775100 1.96700100 -0.19457800  
C -4.04817700 0.98478800 -0.95167200  
C -5.40279400 1.11353400 -1.26484900  
C -6.11277700 2.23528300 -0.82574900  
C -5.46044000 3.22828800 -0.08635600  
H -3.48590500 0.11837200 -1.30112700  
H -5.90191300 0.33973800 -1.85404400  
H -7.17403500 2.34433600 -1.06579900  
H -6.01665700 4.11110000 0.24232700

**TS-exo-1d**

P -2.24137700 -0.46323200 0.09058200  
P 1.33179200 1.63424800 -0.18367500  
C 0.48107300 3.21361400 -0.62513600  
C -0.37068300 3.20016600 -1.74523800  
C 0.63362400 4.40632300 0.09957300  
C -1.04126900 4.35969400 -2.14120600  
H -0.51193600 2.27495500 -2.31169800  
C -0.04773200 5.56456100 -0.29327200  
H 1.28585800 4.44104100 0.97463500  
C -0.88283200 5.54552600 -1.41394500  
H -1.69656900 4.33526300 -3.01601900  
H 0.07911600 6.48632900 0.28115700  
H -1.41348900 6.45147900 -1.71906900  
C 2.11560100 1.96716800 1.45765600  
C 3.36271000 2.60020200 1.59978600  
C 1.42881600 1.55063500 2.61253000  
C 3.90486700 2.81838800 2.87048200  
H 3.91864600 2.92593000 0.71778800  
C 1.96876600 1.77729000 3.88242600  
H 0.46762200 1.03772200 2.51728100  
C 3.20903100 2.41064600 4.01362200  
H 4.87689700 3.30988200 2.96647100

|   |             |             |             |                  |             |             |             |
|---|-------------|-------------|-------------|------------------|-------------|-------------|-------------|
| H | 1.42174800  | 1.44992800  | 4.77067400  | Pd               | 0.04787500  | -0.49624700 | -0.31406200 |
| H | 3.63594900  | 2.58137800  | 5.00565300  | C                | 1.09864000  | -3.04418600 | -0.48096800 |
| C | 2.76620800  | 1.59071900  | -1.35542200 | C                | -0.01156100 | -2.45298900 | -0.81152600 |
| C | 3.21914200  | 2.71532000  | -2.06570800 | C                | 3.04336000  | -4.49331100 | -1.42178500 |
| C | 3.42042300  | 0.35953100  | -1.54257400 | C                | 1.52754500  | -4.70013800 | -1.58229900 |
| C | 4.30691000  | 2.60943700  | -2.93974500 | O                | 0.99472400  | -4.74881400 | -2.71832400 |
| H | 2.72566700  | 3.68153900  | -1.94121000 | H                | 1.10840400  | -5.33679300 | -0.75876200 |
| C | 4.51218900  | 0.25803300  | -2.40903300 | H                | -0.81595000 | -2.83206600 | -1.45051900 |
| H | 3.07043400  | -0.52875200 | -1.00881100 | H                | 3.55973700  | -5.46271700 | -1.53958700 |
| C | 4.95653300  | 1.38324600  | -3.11230900 | H                | 3.37686800  | -3.84367500 | -2.25214900 |
| H | 4.64701000  | 3.49243500  | -3.48784600 | C                | 4.48005200  | -4.01650900 | 0.67758600  |
| H | 5.01066600  | -0.70603000 | -2.54139400 | C                | 3.31771100  | -3.86696800 | -0.08453600 |
| H | 5.80500100  | 1.30310800  | -3.79729700 | C                | 2.25620900  | -3.05863500 | 0.39276800  |
| C | -3.24071200 | -1.32101300 | -1.20259200 | C                | 2.37700800  | -2.42345700 | 1.64612200  |
| C | -4.36625600 | -2.10600300 | -0.90197400 | C                | 3.54263600  | -2.58084700 | 2.39794000  |
| C | -2.84313800 | -1.18356300 | -2.54526300 | C                | 4.59458700  | -3.37284800 | 1.91537100  |
| C | -5.08440300 | -2.73220600 | -1.92642200 | H                | 5.29850600  | -4.64076300 | 0.30717800  |
| H | -4.69121400 | -2.23265600 | 0.13268100  | H                | 1.55643700  | -1.80681300 | 2.02126800  |
| C | -3.56826300 | -1.80255800 | -3.56715900 | H                | 3.63440300  | -2.08174100 | 3.36660400  |
| H | -1.95632800 | -0.59265100 | -2.79181200 | H                | 5.50468700  | -3.49242100 | 2.50972000  |
| C | -4.69010500 | -2.58001800 | -3.25935000 | <b>TS-L4-exo</b> |             |             |             |
| H | -5.95735200 | -3.34210700 | -1.67841000 | P                | -0.25593600 | 2.52692900  | -0.24265900 |
| H | -3.24939500 | -1.68424500 | -4.60618900 | P                | -2.80478900 | -1.49976600 | 0.21559400  |
| H | -5.25245900 | -3.07185200 | -4.05764300 | Pd               | -1.29821800 | 0.34932200  | -0.13568700 |
| C | -3.00373100 | 1.21587200  | 0.20895000  | C                | 0.46618900  | 3.07937100  | -1.91715500 |
| C | -4.04166000 | 1.64079800  | -0.63640000 | C                | 1.95975100  | 2.74711200  | -2.11855100 |
| C | -2.50696800 | 2.10767700  | 1.17848900  | C                | -0.35335400 | 2.50564200  | -3.09506600 |
| C | -4.57451400 | 2.92921100  | -0.51026300 | H                | 0.36437400  | 4.17986900  | -1.92699800 |
| H | -4.44607100 | 0.96973800  | -1.39621300 | C                | 2.47373800  | 3.22904800  | -3.48462800 |
| C | -3.04911500 | 3.38754600  | 1.30940900  | H                | 2.10613700  | 1.65535700  | -2.04419800 |
| H | -1.69253600 | 1.80121500  | 1.84001900  | H                | 2.57349900  | 3.20610300  | -1.33040600 |
| C | -4.08373800 | 3.80375400  | 0.46262900  | C                | 0.16088900  | 2.99716500  | -4.45558500 |
| H | -5.38247000 | 3.24507100  | -1.17585900 | H                | -0.28427700 | 1.40683900  | -3.06876900 |
| H | -2.65679100 | 4.06592700  | 2.07157800  | H                | -1.42084500 | 2.74972900  | -2.98895600 |
| H | -4.50361100 | 4.80832100  | 0.56153200  | C                | 1.64504500  | 2.66891500  | -4.64367900 |
| C | -2.74157300 | -1.26685000 | 1.68055800  | H                | 3.53482500  | 2.94605800  | -3.59658400 |
| C | -3.84871000 | -0.82426500 | 2.42683300  | H                | 2.44111600  | 4.33431900  | -3.51331800 |
| C | -2.00280200 | -2.36780700 | 2.14858700  | H                | -0.44037400 | 2.54305200  | -5.26226800 |
| C | -4.20612900 | -1.47110500 | 3.61418700  | H                | 0.01407100  | 4.09078100  | -4.53381300 |
| H | -4.44091500 | 0.02685100  | 2.08491900  | H                | 2.01113600  | 3.06595100  | -5.60641400 |
| C | -2.36674800 | -3.01617100 | 3.33245700  | H                | 1.77586300  | 1.57151500  | -4.68350400 |
| H | -1.13767300 | -2.72156500 | 1.58290300  | C                | -1.37813900 | 3.99146800  | 0.18501800  |
| C | -3.46721500 | -2.56760300 | 4.06991000  | C                | -2.50336100 | 4.19497700  | -0.85011500 |
| H | -5.06862600 | -1.11491900 | 4.18409100  | C                | -1.97178800 | 3.87870600  | 1.60277400  |
| H | -1.78208100 | -3.87134800 | 3.68194000  | H                | -0.72495800 | 4.88141000  | 0.15063600  |
| H | -3.74716000 | -3.07019400 | 4.99971900  | C                | -3.41381300 | 5.37932800  | -0.49127100 |



|   |             |             |             |   |             |             |             |
|---|-------------|-------------|-------------|---|-------------|-------------|-------------|
| H | -3.11039300 | 3.27276300  | -0.91324500 | C | -4.22435200 | -1.04564200 | 1.38695000  |
| H | -2.08124300 | 4.36436800  | -1.85146000 | C | -4.91269100 | -2.20143400 | 2.14012000  |
| C | -2.88029700 | 5.06686100  | 1.95081600  | C | -3.81771300 | 0.06183100  | 2.38009100  |
| H | -2.55464500 | 2.94324700  | 1.67530100  | H | -4.96683200 | -0.60367000 | 0.69740600  |
| H | -1.17065700 | 3.80530600  | 2.35244200  | C | -6.12152800 | -1.69920900 | 2.94636100  |
| C | -3.99568600 | 5.25376800  | 0.91904500  | H | -4.19315000 | -2.66531500 | 2.83661800  |
| H | -4.22260200 | 5.46006200  | -1.23805600 | H | -5.23433300 | -2.99225000 | 1.44659300  |
| H | -2.83108600 | 6.31671300  | -0.56096200 | C | -5.01720600 | 0.56265600  | 3.19655300  |
| H | -3.30572300 | 4.92226200  | 2.95899800  | H | -3.04437800 | -0.32668900 | 3.06734700  |
| H | -2.27092600 | 5.98857800  | 1.99899800  | H | -3.35220900 | 0.89894500  | 1.83414900  |
| H | -4.60491300 | 6.14070000  | 1.16497300  | C | -5.73280000 | -0.58270100 | 3.92134100  |
| H | -4.67803000 | 4.38406200  | 0.95707900  | H | -6.57928000 | -2.54274500 | 3.49175300  |
| C | 1.20034100  | 2.66004300  | 0.95351500  | H | -6.89270100 | -1.32339900 | 2.24840600  |
| C | 1.70684500  | 4.08505100  | 1.24764700  | H | -4.68401700 | 1.32712900  | 3.91977000  |
| C | 0.98832900  | 1.87013700  | 2.26277500  | H | -5.73076100 | 1.06514100  | 2.51702200  |
| H | 1.99599400  | 2.12617200  | 0.40603400  | H | -6.62566800 | -0.20534800 | 4.44932100  |
| C | 2.98249200  | 4.06106200  | 2.10441200  | H | -5.06220800 | -0.99673300 | 4.69741800  |
| H | 0.92853300  | 4.64875800  | 1.78969700  | C | -3.64229700 | -1.97476100 | -1.40161600 |
| H | 1.89627400  | 4.63462300  | 0.31115000  | C | -4.71587100 | -3.07693000 | -1.33732400 |
| C | 2.26356800  | 1.85686700  | 3.11877700  | C | -4.18760600 | -0.73394600 | -2.13863400 |
| H | 0.16800000  | 2.31661600  | 2.84960600  | H | -2.79771100 | -2.35812200 | -2.00283700 |
| H | 0.67550700  | 0.83890200  | 2.02771300  | C | -5.22884800 | -3.43997500 | -2.73989300 |
| C | 2.77816300  | 3.27275100  | 3.40284400  | H | -5.56739400 | -2.72318100 | -0.73073500 |
| H | 3.30043700  | 5.09425800  | 2.32791600  | H | -4.32436800 | -3.97802200 | -0.83903300 |
| H | 3.80274100  | 3.60015900  | 1.52336800  | C | -4.71376400 | -1.09334300 | -3.53611600 |
| H | 2.07161100  | 1.32086700  | 4.06441700  | H | -5.00753300 | -0.28386400 | -1.54958000 |
| H | 3.04934200  | 1.28618900  | 2.59025600  | H | -3.39967000 | 0.03445100  | -2.21472900 |
| H | 3.71936400  | 3.23027900  | 3.97793000  | C | -5.76176600 | -2.21079200 | -3.48426600 |
| H | 2.04690600  | 3.80505400  | 4.03960700  | H | -6.01434100 | -4.21150700 | -2.66093000 |
| C | -2.10762700 | -3.11749700 | 0.88629600  | H | -4.40449100 | -3.89164400 | -3.32243300 |
| C | -1.31085300 | -3.93476100 | -0.15071000 | H | -5.13447300 | -0.19412900 | -4.01856200 |
| C | -1.24457500 | -2.85511700 | 2.13770100  | H | -3.86586300 | -1.41867900 | -4.16704700 |
| H | -2.97562900 | -3.72628700 | 1.18960000  | H | -6.07806500 | -2.48696600 | -4.50504100 |
| C | -0.77260900 | -5.23896200 | 0.45888400  | H | -6.66574000 | -1.83784800 | -2.96718100 |
| H | -0.46631700 | -3.33370100 | -0.52758600 | C | 1.17094200  | -1.10544400 | -1.19399700 |
| H | -1.93923100 | -4.17671100 | -1.02183200 | C | -0.00040400 | -0.69351100 | -1.45805800 |
| C | -0.69896600 | -4.15709400 | 2.74229100  | C | 2.28879300  | -1.26363100 | -0.25729800 |
| H | -0.40039900 | -2.19980000 | 1.85624800  | N | 3.25390300  | -2.23004700 | -0.84655800 |
| H | -1.82342800 | -2.30592600 | 2.89776900  | C | 3.61040000  | -1.92667500 | -2.22707700 |
| C | 0.07401100  | -4.98639300 | 1.71097000  | C | 2.38695900  | -2.01641600 | -3.12636200 |
| H | -0.18376800 | -5.78471000 | -0.29867200 | O | 2.25197300  | -1.31903400 | -4.12822700 |
| H | -1.62423300 | -5.89380900 | 0.72233900  | H | 1.77029800  | -2.92923700 | -2.96472700 |
| H | -0.05592600 | -3.92314600 | 3.60840300  | S | 4.40387500  | -2.91848700 | 0.15271800  |
| H | -1.54253800 | -4.75613200 | 3.13312200  | O | 3.69933400  | -3.29342200 | 1.39156300  |
| H | 0.39449400  | -5.94507700 | 2.15473800  | O | 5.07720900  | -3.95939700 | -0.64042200 |
| H | 0.99949400  | -4.45212400 | 1.42789700  | C | 5.62281300  | -1.67848200 | 0.57705900  |

|                      |             |             |             |   |             |             |             |
|----------------------|-------------|-------------|-------------|---|-------------|-------------|-------------|
| C                    | 5.45756300  | -0.91562500 | 1.74047100  | C | 1.20214500  | 5.14316300  | 0.05427500  |
| C                    | 6.71637300  | -1.47111900 | -0.27040200 | H | 0.15557400  | 3.26275800  | -0.20919800 |
| C                    | 6.39745300  | 0.06811900  | 2.04452400  | H | 1.06974300  | 3.37115500  | 1.29560600  |
| H                    | 4.61320100  | -1.09999200 | 2.40682300  | C | 1.27601000  | 5.54402300  | -1.42189300 |
| C                    | 7.64524200  | -0.47908600 | 0.05120700  | H | 2.41703100  | 5.05149800  | -3.21039200 |
| H                    | 6.85179700  | -2.08376700 | -1.16358000 | H | 3.38155300  | 5.14977600  | -1.73072900 |
| C                    | 7.50352600  | 0.30659800  | 1.20728700  | H | 0.33767600  | 5.62587500  | 0.54217400  |
| H                    | 6.27360500  | 0.66011100  | 2.95572100  | H | 2.10268900  | 5.51264500  | 0.57934000  |
| H                    | 8.50173400  | -0.31775100 | -0.60880200 | H | 1.40646200  | 6.63568000  | -1.52019800 |
| H                    | -0.64517500 | -0.73815700 | -2.34120000 | H | 0.31653600  | 5.29764800  | -1.91382800 |
| H                    | 4.31911300  | -2.68981000 | -2.58737800 | C | 3.19862400  | 0.84768600  | 1.48705800  |
| H                    | 4.07288400  | -0.92917100 | -2.34729900 | C | 4.61420600  | 1.45717600  | 1.48972500  |
| H                    | 2.78604800  | -0.28843700 | -0.07971700 | C | 2.42522600  | 1.31440800  | 2.73713100  |
| H                    | 1.95969200  | -1.65743800 | 0.71619900  | H | 3.30045300  | -0.24862100 | 1.57638700  |
| C                    | 8.50998700  | 1.36910200  | 1.56049900  | C | 5.37454800  | 1.09276700  | 2.77547900  |
| H                    | 9.27014200  | 1.48700700  | 0.77460100  | H | 4.54178500  | 2.55683300  | 1.42276700  |
| H                    | 8.01839000  | 2.34375500  | 1.71621800  | H | 5.19346400  | 1.12971200  | 0.61218600  |
| H                    | 9.02836300  | 1.12030600  | 2.50241100  | C | 3.17588700  | 0.94279600  | 4.02466000  |
| <b>TS-L4-endo-1d</b> |             |             |             | H | 2.29633300  | 2.41019200  | 2.70705400  |
| P                    | 2.20442100  | 1.01497300  | -0.11270100 | H | 1.41297200  | 0.87799700  | 2.74486100  |
| P                    | -2.46237900 | 0.12975300  | 0.03062600  | C | 4.60141700  | 1.50700700  | 4.03259300  |
| Pd                   | -0.02299600 | 0.11158300  | 0.13160800  | H | 6.37162800  | 1.56645600  | 2.76547600  |
| C                    | 3.35571800  | 0.25544100  | -1.41281300 | H | 5.54800800  | 0.00090800  | 2.79626000  |
| C                    | 4.04035000  | -1.04988600 | -0.95502300 | H | 2.61506900  | 1.30709500  | 4.90291600  |
| C                    | 2.60814900  | -0.00315400 | -2.73933100 | H | 3.21749700  | -0.15855900 | 4.11467700  |
| H                    | 4.14685500  | 1.00458900  | -1.59619600 | H | 5.13942700  | 1.17915800  | 4.93892700  |
| C                    | 4.97617900  | -1.60700500 | -2.03991400 | H | 4.55325000  | 2.61110500  | 4.08042900  |
| H                    | 3.26910900  | -1.80248800 | -0.71679100 | C | -3.50982400 | -1.22227600 | 0.82676500  |
| H                    | 4.62184800  | -0.89312000 | -0.03560200 | C | -3.38137300 | -2.58181600 | 0.11093000  |
| C                    | 3.54396200  | -0.54564400 | -3.82897400 | C | -3.18912200 | -1.38068600 | 2.32766300  |
| H                    | 1.80734800  | -0.73859500 | -2.55181000 | H | -4.55972200 | -0.89536500 | 0.73562900  |
| H                    | 2.10975600  | 0.90747700  | -3.09942100 | C | -4.26274500 | -3.65306700 | 0.77153200  |
| C                    | 4.25796200  | -1.82254600 | -3.37536900 | H | -2.32920100 | -2.91286400 | 0.13851600  |
| H                    | 5.42520200  | -2.55210600 | -1.68827000 | H | -3.65477800 | -2.49220600 | -0.95198900 |
| H                    | 5.81437400  | -0.90052000 | -2.18737000 | C | -4.06994900 | -2.45234200 | 2.98701900  |
| H                    | 2.96821400  | -0.73421800 | -4.75176600 | H | -2.12775400 | -1.66109000 | 2.44270200  |
| H                    | 4.29543100  | 0.22541000  | -4.08259900 | H | -3.31831700 | -0.42366500 | 2.85586000  |
| H                    | 4.97308200  | -2.16028000 | -4.14554400 | C | -3.96241000 | -3.80016300 | 2.26672200  |
| H                    | 3.51422100  | -2.63262400 | -3.26172600 | H | -4.12247900 | -4.61819100 | 0.25448100  |
| C                    | 2.26951600  | 2.88352300  | -0.47146400 | H | -5.32625100 | -3.37989800 | 0.63876000  |
| C                    | 2.31041400  | 3.28024400  | -1.96006300 | H | -3.79035500 | -2.56048900 | 4.04937200  |
| C                    | 1.10679700  | 3.62010900  | 0.22490700  | H | -5.12326900 | -2.11510000 | 2.97453200  |
| H                    | 3.21556100  | 3.22742900  | -0.01941100 | H | -4.64427100 | -4.53739000 | 2.72501400  |
| C                    | 2.41175200  | 4.80415400  | -2.13458900 | H | -2.93883000 | -4.19902700 | 2.39391600  |
| H                    | 1.39505300  | 2.92206200  | -2.46453400 | C | -3.12144100 | 1.75005700  | 0.76614500  |
| H                    | 3.16303800  | 2.80711000  | -2.46920000 | C | -4.60976000 | 1.79408600  | 1.16976000  |

C -2.24795800 2.25502300 1.93424900  
H -2.97952700 2.45922600 -0.07022200  
C -5.02609300 3.20723800 1.61005300  
H -4.78463000 1.09897100 2.00851300  
H -5.25664000 1.46019700 0.34619100  
C -2.66143900 3.66347700 2.38367500  
H -2.33842500 1.56150100 2.78899600  
H -1.18675600 2.24494600 1.63895200  
C -4.14795000 3.73219500 2.75084200  
H -6.08737800 3.20290600 1.91394100  
H -4.95174600 3.89351400 0.74595300  
H -2.03936800 3.98070300 3.23866100  
H -2.45550200 4.37836900 1.56511000  
H -4.43281200 4.76652900 3.01064600  
H -4.32688000 3.12207400 3.65592300  
C -3.04129700 0.13596300 -1.76888800  
C -4.55412400 0.23742800 -2.04060000  
C -2.27842300 1.17896900 -2.61026800  
H -2.70765500 -0.85829900 -2.11739300  
C -4.86261400 0.07589200 -3.53789300  
H -4.92124300 1.22451600 -1.71199900  
H -5.11141900 -0.51737600 -1.46356800  
C -2.59200800 1.03729600 -4.10716500  
H -2.55468300 2.19653500 -2.27838200  
H -1.19366600 1.07838600 -2.43832600  
C -4.09787000 1.09724100 -4.38680500  
H -5.94916300 0.17312400 -3.70686200  
H -4.58707700 -0.94631800 -3.85776900  
H -2.06453700 1.82358000 -4.67461400  
H -2.19320600 0.07102900 -4.46810900  
H -4.29567600 0.93091100 -5.45993800  
H -4.47049000 2.11242800 -4.15410200  
C 0.49010000 -1.93211600 0.70736300  
C 0.64975500 -2.03792100 1.96837600  
C 2.08410500 -4.33292900 1.11521700  
C 1.23976900 -4.26106300 2.37849800  
O 1.75384000 -4.27870800 3.50028200  
H 0.16301000 -4.52286300 2.24629800  
H 0.63334600 -1.53551000 2.92841300  
H 2.93179500 -3.63738600 1.24722400  
H 2.51559400 -5.35056500 1.09907900  
C 1.36085000 -4.08248300 -0.18429800  
C 0.60941500 -2.89204600 -0.39941800  
C -0.00915100 -2.69083700 -1.64686200  
C 0.08830800 -3.63883100 -2.66738900  
C 0.81722500 -4.81202600 -2.45570500

C 1.44402600 -5.02155500 -1.22302100  
H -0.57386600 -1.77054200 -1.80513700  
H -0.40619800 -3.45911700 -3.62584000  
H 0.90040200 -5.56356600 -3.24551400  
H 2.01867000 -5.93792400 -1.05987000

**TS-L4-exo-1d**

P -2.64127200 0.16988000 -0.26146300  
P 1.90372700 -1.35340700 0.07474400  
Pd -0.28246200 -0.29732500 -0.03427500  
C -3.09684000 1.61370500 -1.40803900  
C -3.20639700 2.98687400 -0.71293400  
C -2.10100700 1.71470600 -2.58423200  
H -4.09344400 1.36183700 -1.81400800  
C -3.59457000 4.09372100 -1.70647900  
H -2.23884400 3.23977800 -0.24387000  
H -3.95266400 2.96186900 0.09385200  
C -2.49495100 2.81238200 -3.58216500  
H -1.10198600 1.93824300 -2.17405800  
H -2.00664300 0.75287200 -3.10901700  
C -2.63288300 4.17427700 -2.89541200  
H -3.63606400 5.06212300 -1.17846200  
H -4.61745500 3.89834600 -2.07907800  
H -1.74593800 2.86292600 -4.39140800  
H -3.45466300 2.54336300 -4.06172600  
H -2.97549600 4.93774100 -3.61524200  
H -1.63903500 4.50267900 -2.53895600  
C -3.70229000 -1.23296100 -0.96152600  
C -3.34520400 -1.57257100 -2.42340800  
C -3.65355000 -2.50089000 -0.08631300  
H -4.73584300 -0.84334600 -0.95022400  
C -4.20612000 -2.71643000 -2.98062900  
H -2.27815700 -1.85639200 -2.48315200  
H -3.47340300 -0.68955200 -3.06601500  
C -4.51414900 -3.63750500 -0.65796600  
H -2.60722100 -2.84356400 -0.00290400  
H -3.99134200 -2.27570600 0.93504000  
C -4.13805300 -3.96926100 -2.10409400  
H -3.88681500 -2.94645300 -4.01182200  
H -5.25671300 -2.37769100 -3.04802100  
H -4.41555900 -4.53055000 -0.01689300  
H -5.57902300 -3.34155500 -0.61842500  
H -4.80014200 -4.75631300 -2.50457600  
H -3.11118500 -4.37943100 -2.13029400  
C -3.43498200 0.61748200 1.38967100  
C -4.97502800 0.66692600 1.40393400  
C -2.91224800 -0.20872900 2.58441400

|   |             |             |             |
|---|-------------|-------------|-------------|
| H | -3.06207200 | 1.64456800  | 1.54610900  |
| C | -5.50043700 | 1.22747200  | 2.73525800  |
| H | -5.37565200 | -0.35187700 | 1.26315400  |
| H | -5.35872300 | 1.27248300  | 0.56707900  |
| C | -3.43151000 | 0.36039800  | 3.91314300  |
| H | -3.24010900 | -1.25734700 | 2.49458900  |
| H | -1.81110400 | -0.22822100 | 2.58307900  |
| C | -4.96243500 | 0.44207300  | 3.93682100  |
| H | -6.60428100 | 1.21794600  | 2.73371600  |
| H | -5.19714600 | 2.28686000  | 2.82651100  |
| H | -3.06788900 | -0.25886100 | 4.75133500  |
| H | -3.00834900 | 1.37084800  | 4.06427500  |
| H | -5.30767300 | 0.90099000  | 4.87940200  |
| H | -5.37993800 | -0.58206400 | 3.91687100  |
| C | 2.87032800  | -1.15039200 | 1.67935800  |
| C | 3.56566500  | 0.22039600  | 1.80300900  |
| C | 1.94605200  | -1.40538400 | 2.88905900  |
| H | 3.65657600  | -1.92321300 | 1.67492100  |
| C | 4.29849300  | 0.36481300  | 3.14526000  |
| H | 2.81403100  | 1.02101900  | 1.71782500  |
| H | 4.28220400  | 0.36611600  | 0.98002800  |
| C | 2.67744400  | -1.23415000 | 4.22819100  |
| H | 1.10180100  | -0.69543000 | 2.84755400  |
| H | 1.50644000  | -2.41448000 | 2.82909900  |
| C | 3.35662800  | 0.13546100  | 4.33123800  |
| H | 4.75867200  | 1.36628300  | 3.20708500  |
| H | 5.12977800  | -0.36361400 | 3.19059800  |
| H | 1.96402900  | -1.37629700 | 5.05838600  |
| H | 3.44110500  | -2.02732100 | 4.33326700  |
| H | 3.90739000  | 0.22054700  | 5.28409800  |
| H | 2.58917900  | 0.93156900  | 4.33623500  |
| C | 1.75229900  | -3.22601000 | -0.19473500 |
| C | 2.80095800  | -4.11717200 | 0.49964000  |
| C | 0.33156900  | -3.73909100 | 0.11227200  |
| H | 1.89971000  | -3.32352200 | -1.28555600 |
| C | 2.63424900  | -5.59158800 | 0.09852400  |
| H | 2.68653500  | -4.03444400 | 1.59409200  |
| H | 3.82257000  | -3.78418000 | 0.26347200  |
| C | 0.16226400  | -5.21480900 | -0.27520200 |
| H | 0.11983200  | -3.61614200 | 1.18996800  |
| H | -0.40915000 | -3.11970000 | -0.42003600 |
| C | 1.21955800  | -6.10462500 | 0.38747700  |
| H | 3.38172900  | -6.20605900 | 0.62972700  |
| H | 2.84963600  | -5.70128700 | -0.98063700 |
| H | -0.85228100 | -5.55707500 | -0.00714400 |
| H | 0.24418600  | -5.31010100 | -1.37409500 |

|                      |             |             |             |
|----------------------|-------------|-------------|-------------|
| H                    | 1.11196000  | -7.14867700 | 0.04591500  |
| H                    | 1.05339900  | -6.11431600 | 1.48093500  |
| C                    | 3.07250700  | -0.78320100 | -1.28426600 |
| C                    | 4.43848200  | -1.49136900 | -1.35791800 |
| C                    | 2.37803500  | -0.80247900 | -2.66164700 |
| H                    | 3.24919800  | 0.27639400  | -1.02783200 |
| C                    | 5.33083500  | -0.87358600 | -2.44600000 |
| H                    | 4.28597500  | -2.55925500 | -1.59170400 |
| H                    | 4.95390900  | -1.44997700 | -0.38519900 |
| C                    | 3.27313600  | -0.20085900 | -3.75522800 |
| H                    | 2.12643600  | -1.84322300 | -2.93604000 |
| H                    | 1.42271600  | -0.25376800 | -2.60751200 |
| C                    | 4.64337300  | -0.88519200 | -3.81553800 |
| H                    | 6.29039400  | -1.41719300 | -2.49293700 |
| H                    | 5.57464900  | 0.16846300  | -2.16781500 |
| H                    | 2.76481400  | -0.27129200 | -4.73246500 |
| H                    | 3.41426900  | 0.87655300  | -3.55236500 |
| H                    | 5.28261900  | -0.39596900 | -4.57071100 |
| H                    | 4.51343700  | -1.93247200 | -4.14719900 |
| C                    | 0.82165500  | 2.51701500  | 0.64169200  |
| C                    | 0.11019300  | 1.49344400  | 0.95452900  |
| C                    | 2.50569900  | 4.20850500  | 1.86392200  |
| C                    | 1.12202400  | 3.84582100  | 2.39901800  |
| O                    | 0.96262500  | 3.26670100  | 3.49109800  |
| H                    | 0.30791700  | 4.49583400  | 1.99685000  |
| H                    | -0.45049100 | 1.32213800  | 1.88211300  |
| H                    | 2.77628700  | 5.20759700  | 2.25274600  |
| H                    | 3.22912000  | 3.49285800  | 2.29446700  |
| C                    | 3.37810600  | 4.98663700  | -0.42483200 |
| C                    | 2.54290400  | 4.18553300  | 0.35851300  |
| C                    | 1.66622900  | 3.25434700  | -0.26064800 |
| C                    | 1.65624900  | 3.15745000  | -1.66916300 |
| C                    | 2.49652200  | 3.96587800  | -2.43948800 |
| C                    | 3.35848300  | 4.88033400  | -1.82123700 |
| H                    | 4.04809800  | 5.70429400  | 0.05812000  |
| H                    | 0.98525300  | 2.44651600  | -2.15478300 |
| H                    | 2.47707700  | 3.88315400  | -3.52992300 |
| H                    | 4.01127300  | 5.51501500  | -2.42683300 |
| <b>TS-L4-endo-1e</b> |             |             |             |
| P                    | 0.82828400  | 2.53106000  | -0.24652700 |
| P                    | 1.92540900  | -2.07701500 | 0.01195000  |
| Pd                   | 0.99746000  | 0.16170900  | 0.16455000  |
| C                    | 0.40906200  | 3.70175800  | 1.19420100  |
| C                    | -1.09153200 | 4.01765400  | 1.36463200  |
| C                    | 0.97124500  | 3.15759600  | 2.52572200  |
| H                    | 0.92380900  | 4.65134500  | 0.95949800  |

|   |             |            |             |   |             |             |             |
|---|-------------|------------|-------------|---|-------------|-------------|-------------|
| C | -1.33777700 | 4.98022300 | 2.53795700  | H | -0.84460700 | 3.70048600  | -4.86912700 |
| H | -1.65402800 | 3.08287300 | 1.53563600  | C | 0.86873500  | -3.62440200 | 0.21705500  |
| H | -1.50524700 | 4.46891600 | 0.45148500  | C | 0.36996900  | -3.83546300 | 1.66106000  |
| C | 0.74099800  | 4.13137300 | 3.68968100  | C | -0.31825900 | -3.62028400 | -0.76763400 |
| H | 0.46788100  | 2.20382000 | 2.74967400  | H | 1.51885100  | -4.47830600 | -0.03818200 |
| H | 2.04298400  | 2.92650700 | 2.43926400  | C | -0.48523900 | -5.10652700 | 1.78179500  |
| C | -0.74478300 | 4.46537300 | 3.85250300  | H | -0.22867800 | -2.96414900 | 1.97649500  |
| H | -2.42216500 | 5.15535600 | 2.64696100  | H | 1.21847000  | -3.90326100 | 2.35953300  |
| H | -0.88691500 | 5.96101500 | 2.29681800  | C | -1.17262900 | -4.88983700 | -0.64081100 |
| H | 1.14244400  | 3.69684700 | 4.62173600  | H | -0.94903700 | -2.73653600 | -0.56745500 |
| H | 1.30983800  | 5.06274200 | 3.50903900  | H | 0.03856800  | -3.51672800 | -1.80414300 |
| H | -0.89001900 | 5.20808700 | 4.65614000  | C | -1.65808200 | -5.10628600 | 0.79600700  |
| H | -1.28860400 | 3.55452200 | 4.16517500  | H | -0.85416300 | -5.20578300 | 2.81731800  |
| C | 2.44883800  | 3.28153300 | -0.88375700 | H | 0.15010800  | -5.99141500 | 1.59031800  |
| C | 3.54888600  | 3.37342200 | 0.19274600  | H | -2.03057600 | -4.83049300 | -1.33279100 |
| C | 2.98167200  | 2.53230500 | -2.12084600 | H | -0.57453700 | -5.76382200 | -0.95950300 |
| H | 2.19352300  | 4.31282700 | -1.18345900 | H | -2.22461200 | -6.05048000 | 0.87274600  |
| C | 4.84282900  | 3.99201000 | -0.35899600 | H | -2.36107500 | -4.29686900 | 1.06779200  |
| H | 3.76587900  | 2.36240800 | 0.58328200  | C | 2.82803100  | -2.32166500 | -1.64080400 |
| H | 3.20665500  | 3.97660200 | 1.04611400  | C | 3.10350900  | -3.77268000 | -2.08579000 |
| C | 4.27335200  | 3.15703700 | -2.66798100 | C | 2.16664200  | -1.53858000 | -2.79391500 |
| H | 3.17598400  | 1.48058000 | -1.84259600 | H | 3.80347600  | -1.83962500 | -1.44442700 |
| H | 2.22320300  | 2.50793500 | -2.91720600 | C | 3.96980100  | -3.81127200 | -3.35536200 |
| C | 5.35985400  | 3.24806300 | -1.59318800 | H | 2.14685100  | -4.28006200 | -2.29749600 |
| H | 5.61060600  | 4.00561400 | 0.43393700  | H | 3.59396100  | -4.34820600 | -1.28792600 |
| H | 4.65208800  | 5.04826600 | -0.62560000 | C | 3.02060500  | -1.57812400 | -4.06912300 |
| H | 4.63112000  | 2.56914700 | -3.53100000 | H | 1.17225400  | -1.96946900 | -3.00916800 |
| H | 4.05340300  | 4.17090000 | -3.05123800 | H | 1.99136700  | -0.49564200 | -2.48505400 |
| H | 6.25976400  | 3.74582700 | -1.99409000 | C | 3.33833200  | -3.01388500 | -4.50132000 |
| H | 5.66992200  | 2.22730300 | -1.30107600 | H | 4.13231500  | -4.85944600 | -3.66125600 |
| C | -0.45208400 | 2.98242300 | -1.56346800 | H | 4.96834900  | -3.39462100 | -3.12636400 |
| C | -0.32384200 | 4.39180800 | -2.17257700 | H | 2.50427200  | -1.03769400 | -4.88149700 |
| C | -0.61229600 | 1.92549700 | -2.67581900 | H | 3.96688600  | -1.03554000 | -3.88557800 |
| H | -1.39036000 | 2.95340800 | -0.98476000 | H | 4.00436100  | -3.01221200 | -5.38158400 |
| C | -1.51917400 | 4.71914100 | -3.08161200 | H | 2.40347200  | -3.51325700 | -4.81776000 |
| H | 0.60195200  | 4.45200200 | -2.77061200 | C | 3.26928500  | -2.27055400 | 1.32505000  |
| H | -0.23673500 | 5.15486900 | -1.38193700 | C | 4.08057500  | -3.57941600 | 1.32780800  |
| C | -1.81112300 | 2.25457500 | -3.57882600 | C | 4.21665800  | -1.05387000 | 1.34993000  |
| H | 0.30042300  | 1.88087000 | -3.29373500 | H | 2.68227900  | -2.23593000 | 2.26059100  |
| H | -0.73515900 | 0.92481300 | -2.22980800 | C | 5.03492800  | -3.64096700 | 2.53127600  |
| C | -1.70616900 | 3.66263600 | -4.17632900 | H | 4.67791900  | -3.64268800 | 0.40233300  |
| H | -1.38284200 | 5.71814800 | -3.53116000 | H | 3.41443600  | -4.45669300 | 1.33688200  |
| H | -2.43734600 | 4.77473500 | -2.46818300 | C | 5.18507000  | -1.11500000 | 2.54055400  |
| H | -1.89171600 | 1.50178600 | -4.38221000 | H | 4.79997200  | -1.01831800 | 0.41160800  |
| H | -2.74012000 | 2.18197000 | -2.98431700 | H | 3.62694800  | -0.12226900 | 1.38727000  |
| H | -2.60174000 | 3.89093600 | -4.77983200 | C | 5.97267700  | -2.42951100 | 2.57295200  |

|                     |             |             |             |   |             |            |             |
|---------------------|-------------|-------------|-------------|---|-------------|------------|-------------|
| H                   | 5.61863500  | -4.57723800 | 2.49613200  | H | -0.93330300 | 4.22789900 | 1.60254400  |
| H                   | 4.44184700  | -3.67724500 | 3.46396100  | C | -3.37606400 | 3.35376900 | 2.63117100  |
| H                   | 5.87528000  | -0.25439400 | 2.50416500  | H | -2.66685600 | 1.70198500 | 1.41849800  |
| H                   | 4.60867800  | -1.01339100 | 3.47878200  | H | -2.92975300 | 3.20781300 | 0.52854800  |
| H                   | 6.61401100  | -2.47007000 | 3.47040800  | C | -1.37960500 | 3.22110700 | 4.16228500  |
| H                   | 6.65254200  | -2.46756600 | 1.70118200  | H | -0.65462300 | 1.53401100 | 3.03833500  |
| C                   | -0.76459000 | -0.11934600 | 1.46410500  | H | 0.51226600  | 2.84973000 | 3.16254200  |
| C                   | -0.57426700 | -0.31482700 | 2.70569600  | C | -2.86621100 | 2.89167200 | 3.99919100  |
| C                   | -1.96382000 | -0.05052600 | 0.56877500  | H | -4.43080200 | 3.05895700 | 2.49222600  |
| N                   | -3.18298500 | 0.17936400  | 1.36819500  | H | -3.35459700 | 4.45893700 | 2.59128000  |
| C                   | -3.44731600 | -0.79034200 | 2.42518300  | H | -1.00236200 | 2.83363300 | 5.12456500  |
| C                   | -2.61837500 | -0.54814100 | 3.67884400  | H | -1.24396200 | 4.31862800 | 4.19150700  |
| O                   | -2.48627700 | -1.44140200 | 4.52614200  | H | -3.45919500 | 3.35633000 | 4.80609400  |
| H                   | -2.51925500 | 0.52929200  | 3.94882700  | H | -3.00406100 | 1.79876100 | 4.09396200  |
| S                   | -4.50046100 | 0.87325800  | 0.59634100  | C | 1.30871000  | 3.92174900 | 0.04977400  |
| O                   | -5.44978900 | 1.26017500  | 1.65161400  | C | 2.08636300  | 4.22150800 | 1.34698500  |
| O                   | -3.95810300 | 1.91095600  | -0.29875900 | C | 2.29142200  | 3.69458800 | -1.11504400 |
| C                   | -5.29077000 | -0.37058700 | -0.42063000 | H | 0.69170000  | 4.80780500 | -0.18058700 |
| C                   | -6.41765100 | -1.04095100 | 0.06457700  | C | 3.07427200  | 5.38537900 | 1.17108600  |
| C                   | -4.76188000 | -0.67162100 | -1.68391800 | H | 2.63968800  | 3.31643800 | 1.65876600  |
| C                   | -7.01334700 | -2.02840800 | -0.72401900 | H | 1.39435900  | 4.46759100 | 2.16551500  |
| H                   | -6.83518500 | -0.78659600 | 1.04014100  | C | 3.27237300  | 4.86352600 | -1.28671700 |
| C                   | -5.36995100 | -1.66135800 | -2.45354700 | H | 2.86178800  | 2.76796900 | -0.92196700 |
| H                   | -3.89324300 | -0.13525800 | -2.06996400 | H | 1.74593500  | 3.53411600 | -2.05675100 |
| C                   | -6.50267400 | -2.35750100 | -1.98991300 | C | 4.03991300  | 5.15434500 | 0.00571200  |
| H                   | -7.89778200 | -2.54889000 | -0.34693300 | H | 3.63229700  | 5.53882500 | 2.11102600  |
| H                   | -4.96102800 | -1.89490100 | -3.44061300 | H | 2.50549800  | 6.31668800 | 0.99135800  |
| H                   | -3.29661400 | -1.82985500 | 2.08248200  | H | 3.97241400  | 4.64014600 | -2.11040400 |
| H                   | -4.49733700 | -0.69220500 | 2.74578500  | H | 2.71255500  | 5.76783600 | -1.59008600 |
| H                   | -1.87014300 | 0.76705100  | -0.15261200 | H | 4.70143800  | 6.02814700 | -0.12537400 |
| H                   | -2.05175700 | -0.99161500 | -0.00671200 | H | 4.69674400  | 4.29593300 | 0.24038800  |
| C                   | -7.14389800 | -3.41955600 | -2.84272000 | C | -1.02294400 | 2.60642300 | -1.29870400 |
| H                   | -8.01341200 | -3.87172900 | -2.34400500 | C | -1.39122400 | 4.03015700 | -1.75631900 |
| H                   | -7.47912900 | -3.00126900 | -3.80687500 | C | -0.53402700 | 1.75974700 | -2.49157800 |
| H                   | -6.42543800 | -4.22298500 | -3.07758400 | H | -1.94680400 | 2.11761300 | -0.94561200 |
| C                   | 0.34855400  | -0.47973400 | 3.83728200  | C | -2.43078800 | 4.00402300 | -2.88829300 |
| H                   | 0.03815200  | -1.32846500 | 4.47083300  | H | -0.48545400 | 4.54507000 | -2.12032400 |
| H                   | 1.38640900  | -0.65433900 | 3.50417600  | H | -1.77342300 | 4.62741200 | -0.91237500 |
| H                   | 0.35003300  | 0.41364900  | 4.48653700  | C | -1.57521100 | 1.73728200 | -3.62070100 |
| <b>TS-L4-exo-1e</b> |             |             |             | H | 0.41274300  | 2.16631100 | -2.88548100 |
| P                   | 0.08657200  | 2.48424300  | 0.23115800  | H | -0.31602700 | 0.73309400 | -2.15272600 |
| P                   | 2.77561600  | -1.42830900 | -0.19826600 | C | -1.96038700 | 3.15094600 | -4.07166600 |
| Pd                  | 1.15970400  | 0.28595500  | 0.30558500  | H | -2.64702900 | 5.03461500 | -3.21952600 |
| C                   | -1.03757300 | 3.12789100  | 1.63220300  | H | -3.38173200 | 3.59509700 | -2.49922200 |
| C                   | -2.53580500 | 2.79763500  | 1.46934100  | H | -1.18780400 | 1.15415600 | -4.47410500 |
| C                   | -0.55458800 | 2.62954300  | 3.01124700  | H | -2.48070400 | 1.20972300 | -3.26723700 |

H -2.74404900 3.10623700 -4.84772300  
H -1.08309400 3.63399700 -4.54135100  
C 2.14671200 -3.17238900 -0.53871500  
C 1.64010500 -3.89078300 0.72842400  
C 1.04632000 -3.14975200 -1.61946100  
H 3.00274900 -3.74733000 -0.93025900  
C 1.11070400 -5.29747200 0.40855800  
H 0.83093500 -3.29752500 1.18757500  
H 2.44287600 -3.96810000 1.47830200  
C 0.50790200 -4.55391700 -1.93007100  
H 0.21757900 -2.51052000 -1.26799900  
H 1.42284200 -2.68532700 -2.54437600  
C 0.02010900 -5.27155900 -0.66723600  
H 0.72877700 -5.76664100 1.33186600  
H 1.94863800 -5.93041200 0.06110700  
H -0.30950300 -4.48063500 -2.66813800  
H 1.30694200 -5.15286800 -2.40552500  
H -0.30111100 -6.29915200 -0.91122000  
H -0.87364200 -4.75123800 -0.27753200  
C 3.81146800 -0.97312700 -1.72275300  
C 4.46834000 -2.13220500 -2.50011500  
C 3.04659400 -0.05759100 -2.69999900  
H 4.62099500 -0.36414600 -1.27985600  
C 5.39206100 -1.60520700 -3.61052800  
H 3.68384100 -2.75569200 -2.96192200  
H 5.03824600 -2.79081100 -1.82947600  
C 3.95976000 0.46910900 -3.81612900  
H 2.20920300 -0.61911900 -3.15127900  
H 2.59523000 0.78291800 -2.14973700  
C 4.65229600 -0.66976800 -4.57273300  
H 5.82987100 -2.45515200 -4.16239300  
H 6.23880400 -1.06211200 -3.15094900  
H 3.37509700 1.09403400 -4.51343100  
H 4.72690700 1.13071000 -3.37196700  
H 5.34925400 -0.26356300 -5.32618800  
H 3.89292300 -1.24986100 -5.12974800  
C 4.04305200 -1.65193900 1.18072400  
C 5.19058200 -2.64875400 0.93318700  
C 4.60364100 -0.29737100 1.65967300  
H 3.42736900 -2.05214800 2.00535400  
C 6.06052700 -2.81913700 2.18895800  
H 5.82832500 -2.27934600 0.11213700  
H 4.79896800 -3.62824900 0.61566700  
C 5.48767300 -0.46016800 2.90522200  
H 5.20067200 0.16276700 0.85117700  
H 3.77536600 0.39935400 1.87047900

C 6.61260200 -1.47696300 2.68151200  
H 6.88700700 -3.51959500 1.97721700  
H 5.45557200 -3.28263900 2.99030000  
H 5.90692300 0.51881800 3.19541000  
H 4.85881100 -0.79364700 3.75148500  
H 7.19248100 -1.61724200 3.61017500  
H 7.31891800 -1.07803600 1.92946800  
C -1.12063400 -1.15084100 1.48816200  
C 0.01911800 -0.72776000 1.85729400  
C -2.12563200 -1.37206300 0.43981800  
N -3.14825700 -2.29791200 0.99226100  
C -3.61405300 -1.89651100 2.31438900  
C -2.44187100 -1.85197200 3.28606300  
O -2.40464300 -1.04914300 4.22472900  
H -1.82629800 -2.77890700 3.29626600  
S -4.22352500 -3.01906000 -0.06478000  
O -3.42214500 -3.48413900 -1.21074400  
O -4.99260000 -3.99487000 0.72368200  
C -5.36208200 -1.77616500 -0.66554300  
C -5.06737700 -1.08006300 -1.84526900  
C -6.52287400 -1.49741100 0.06379000  
C -5.94610100 -0.09173300 -2.28603900  
H -4.17008200 -1.31902900 -2.41888900  
C -7.38887200 -0.50204000 -0.39414400  
H -6.75847800 -2.05805800 0.97019300  
C -7.11798400 0.21717900 -1.57010300  
H -5.72071200 0.44797100 -3.21022900  
H -8.29818500 -0.28534600 0.17281100  
H -4.31874100 -2.65400500 2.69254700  
H -4.11671400 -0.91122200 2.31453000  
H -2.59629300 -0.41320100 0.14208400  
H -1.69505800 -1.83144800 -0.46166100  
C -8.05591000 1.28435500 -2.06835300  
H -8.89472800 1.44382300 -1.37537400  
H -7.52874100 2.24397100 -2.20027200  
H -8.47233700 1.01238600 -3.05332100  
C 0.83314900 -0.70917400 3.10941600  
H 0.16009800 -0.80518600 3.97978000  
H 1.54186900 -1.55270100 3.13394100  
H 1.41513900 0.21601500 3.22673300  
**TS-L4-endo-1f**  
P -0.83770600 -2.53958900 -0.51104100  
P -1.54710300 2.18436200 -0.39251100  
Pd -0.93922100 -0.17765000 -0.02274200  
C -0.66700000 -3.81571100 0.89335700  
C 0.78221000 -4.21953600 1.23852100

|   |             |             |             |   |             |             |             |
|---|-------------|-------------|-------------|---|-------------|-------------|-------------|
| C | -1.37779500 | -3.33370500 | 2.17532700  | H | 3.08154800  | -2.33503500 | -2.74349000 |
| H | -1.18604600 | -4.71962600 | 0.52549900  | H | 3.07072300  | -3.95518500 | -4.62580800 |
| C | 0.82544600  | -5.27011200 | 2.36051800  | H | 1.35749600  | -3.63427300 | -4.93212400 |
| H | 1.35523200  | -3.32786500 | 1.54981500  | C | -0.69446200 | 3.62989000  | 0.47408400  |
| H | 1.29786100  | -4.63159600 | 0.35970700  | C | -1.00514700 | 3.70926700  | 1.98208600  |
| C | -1.35355700 | -4.39570600 | 3.28328200  | C | 0.83064500  | 3.60766300  | 0.24849400  |
| H | -0.86370300 | -2.42914400 | 2.53582900  | H | -1.09590700 | 4.54365900  | 0.00493500  |
| H | -2.41559900 | -3.03694600 | 1.96663300  | C | -0.31468900 | 4.91614900  | 2.63603800  |
| C | 0.07969100  | -4.81772900 | 3.61891800  | H | -0.65841700 | 2.78688700  | 2.47643300  |
| H | 1.87670900  | -5.50685100 | 2.59965600  | H | -2.09008500 | 3.77474500  | 2.15544300  |
| H | 0.37230100  | -6.20808900 | 1.98873600  | C | 1.52622300  | 4.80649200  | 0.91084000  |
| H | -1.86071600 | -4.00469900 | 4.18243000  | H | 1.24043100  | 2.67841900  | 0.67577800  |
| H | -1.93200800 | -5.28077500 | 2.95831200  | H | 1.06544400  | 3.58852500  | -0.82757200 |
| H | 0.08109600  | -5.62143400 | 4.37558200  | C | 1.19971300  | 4.89932800  | 2.40550500  |
| H | 0.61299900  | -3.96066400 | 4.07060100  | H | -0.53839400 | 4.92803700  | 3.71687200  |
| C | -2.39648900 | -3.15366000 | -1.39731800 | H | -0.73938700 | 5.84839700  | 2.21873200  |
| C | -3.63831300 | -3.21622500 | -0.48571000 | H | 2.61709200  | 4.73113900  | 0.75882700  |
| C | -2.70264000 | -2.32385400 | -2.66013400 | H | 1.20499700  | 5.73818400  | 0.40874900  |
| H | -2.16458500 | -4.18682800 | -1.70896100 | H | 1.66587300  | 5.79844300  | 2.84477900  |
| C | -4.87833800 | -3.72314200 | -1.23866400 | H | 1.63212300  | 4.03022600  | 2.93428000  |
| H | -3.84501900 | -2.21099600 | -0.07553400 | C | -1.48456700 | 2.62490900  | -2.23999000 |
| H | -3.45402500 | -3.87768500 | 0.37320300  | C | -1.40038100 | 4.12096600  | -2.60601100 |
| C | -3.94338200 | -2.83704800 | -3.40560200 | C | -0.39163800 | 1.83855800  | -2.99153500 |
| H | -2.86220300 | -1.27017400 | -2.36706600 | H | -2.45792700 | 2.24567900  | -2.60202700 |
| H | -1.84149700 | -2.32882400 | -3.34421800 | C | -1.50119900 | 4.33136800  | -4.12560400 |
| C | -5.17206000 | -2.89779600 | -2.49427300 | H | -0.43685700 | 4.53128400  | -2.25891500 |
| H | -5.74850900 | -3.71693700 | -0.55960100 | H | -2.18728200 | 4.69973900  | -2.10186700 |
| H | -4.71711500 | -4.77828200 | -1.52819200 | C | -0.47550300 | 2.05354700  | -4.50956100 |
| H | -4.14156800 | -2.19297400 | -4.27984300 | H | 0.60413700  | 2.15626900  | -2.63213100 |
| H | -3.73523200 | -3.84756000 | -3.80398700 | H | -0.47757500 | 0.76652300  | -2.75591200 |
| H | -6.03564200 | -3.31846000 | -3.03792900 | C | -0.43030600 | 3.53914000  | -4.88251600 |
| H | -5.45806700 | -1.87124300 | -2.19869800 | H | -1.41746600 | 5.40768100  | -4.35618200 |
| C | 0.57758100  | -3.01755800 | -1.67587200 | H | -2.50308700 | 4.01518100  | -4.47124600 |
| C | 0.43918500  | -4.39062700 | -2.36221700 | H | 0.34204700  | 1.50594000  | -5.00996000 |
| C | 0.95428200  | -1.93448400 | -2.70581300 | H | -1.41943100 | 1.61412000  | -4.88291200 |
| H | 1.43196800  | -3.07820800 | -0.98136000 | H | -0.55513000 | 3.66651000  | -5.97183600 |
| C | 1.72010800  | -4.76785200 | -3.12353600 | H | 0.56687200  | 3.94706500  | -4.63210700 |
| H | -0.40095700 | -4.36131000 | -3.07733000 | C | -3.36304300 | 2.40547500  | 0.07682300  |
| H | 0.19839500  | -5.17606800 | -1.62757500 | C | -4.01123500 | 3.77157200  | -0.21514900 |
| C | 2.23872300  | -2.31476600 | -3.45850100 | C | -4.23452500 | 1.26552500  | -0.48634300 |
| H | 0.13832000  | -1.79828900 | -3.43520800 | H | -3.33770400 | 2.27230800  | 1.17281500  |
| H | 1.08408000  | -0.96493600 | -2.20040000 | C | -5.44435400 | 3.83841600  | 0.33646500  |
| C | 2.12042400  | -3.68632700 | -4.13287200 | H | -4.04754100 | 3.93573300  | -1.30574200 |
| H | 1.57762600  | -5.73629800 | -3.63389200 | H | -3.41148400 | 4.59200900  | 0.20975400  |
| H | 2.54323400  | -4.91382900 | -2.39993700 | C | -5.67408300 | 1.33594600  | 0.04494600  |
| H | 2.47776800  | -1.53811000 | -4.20558900 | H | -4.25383900 | 1.32228700  | -1.59012500 |



|   |             |             |             |
|---|-------------|-------------|-------------|
| H | -3.78303100 | 0.29199800  | -0.22990100 |
| C | -6.31544000 | 2.70381000  | -0.21325000 |
| H | -5.89133900 | 4.81806600  | 0.09346800  |
| H | -5.41299400 | 3.77450800  | 1.44006200  |
| H | -6.28045200 | 0.53536200  | -0.41296400 |
| H | -5.66582600 | 1.13764000  | 1.13258000  |
| H | -7.32508800 | 2.74375200  | 0.23101300  |
| H | -6.44762300 | 2.84409800  | -1.30250100 |
| C | 0.64227400  | -0.05778200 | 1.46506500  |
| C | 0.36225300  | 0.09404900  | 2.70188400  |
| C | 1.92387400  | -0.16165600 | 0.68928600  |
| N | 3.06416600  | -0.31331200 | 1.61185300  |
| C | 3.21300800  | 0.75565700  | 2.59132600  |
| C | 2.24837000  | 0.62630900  | 3.76137800  |
| O | 1.98082500  | 1.62337300  | 4.45746400  |
| H | 2.21173200  | -0.40040200 | 4.19376600  |
| S | 4.45111400  | -1.05318100 | 1.03424300  |
| O | 5.29143400  | -1.33850700 | 2.20822700  |
| O | 4.00316100  | -2.16834500 | 0.18080700  |
| C | 5.34157700  | 0.10799200  | 0.00123400  |
| C | 6.37263500  | 0.87504300  | 0.55953300  |
| C | 4.98727200  | 0.25196200  | -1.34464800 |
| C | 7.04203400  | 1.79807400  | -0.24233200 |
| H | 6.65838200  | 0.74077700  | 1.60411000  |
| C | 5.67002800  | 1.18309800  | -2.13039200 |
| H | 4.19832000  | -0.36027900 | -1.78463300 |
| C | 6.70354100  | 1.97120000  | -1.59718100 |
| H | 7.85052800  | 2.39316000  | 0.19169500  |
| H | 5.39694200  | 1.29279800  | -3.18328300 |
| H | 3.09808500  | 1.75094500  | 2.12651500  |
| H | 4.22129800  | 0.70452600  | 3.03293000  |
| H | 1.90231200  | -1.03651500 | 0.03241000  |
| H | 2.05919700  | 0.72961800  | 0.04849700  |
| C | 7.44131700  | 2.97308800  | -2.44476000 |
| H | 8.52205500  | 2.75325500  | -2.46452400 |
| H | 7.07273200  | 2.97856000  | -3.48078700 |
| H | 7.33184900  | 3.99161600  | -2.03526800 |
| C | -0.61645500 | 0.11193400  | 3.81075100  |
| H | -0.34082400 | 0.93132300  | 4.49909700  |
| H | -0.46820500 | -0.81288900 | 4.40261200  |
| C | -2.10864500 | 0.23507100  | 3.45576800  |
| C | -3.00763400 | 0.12932400  | 4.69193800  |
| H | -2.38352000 | -0.54491100 | 2.72626800  |
| H | -2.28430300 | 1.20025600  | 2.95445000  |
| C | -4.49581400 | 0.29132800  | 4.38376400  |
| H | -2.83769800 | -0.84746700 | 5.18134100  |

|   |             |             |            |
|---|-------------|-------------|------------|
| H | -2.70001800 | 0.89263500  | 5.43038800 |
| H | -5.10936800 | 0.19585700  | 5.29521600 |
| H | -4.71072200 | 1.27998400  | 3.94335900 |
| H | -4.84517300 | -0.47307300 | 3.66845300 |

#### TS-L4-exo-1f

|    |             |             |             |
|----|-------------|-------------|-------------|
| P  | 2.39717700  | -1.56617500 | -0.85547900 |
| P  | 0.30388100  | 2.55373000  | 0.25564600  |
| Pd | 1.10425200  | 0.26595500  | 0.03153100  |
| C  | 1.59790200  | -3.26351700 | -1.17224500 |
| C  | 1.68967000  | -4.26135700 | 0.00112900  |
| C  | 0.11809600  | -3.11229200 | -1.58566000 |
| H  | 2.15905500  | -3.69364200 | -2.02190800 |
| C  | 1.05198500  | -5.61357600 | -0.36062200 |
| H  | 1.17186000  | -3.84266100 | 0.88237600  |
| H  | 2.73476700  | -4.43478600 | 0.29554000  |
| C  | -0.51761300 | -4.45704600 | -1.96604300 |
| H  | -0.43565000 | -2.69254800 | -0.73283800 |
| H  | 0.00288000  | -2.39760800 | -2.41298500 |
| C  | -0.40130400 | -5.46975700 | -0.82295500 |
| H  | 1.11313400  | -6.29105300 | 0.50888600  |
| H  | 1.64660900  | -6.08564700 | -1.16523600 |
| H  | -1.57697100 | -4.29649400 | -2.22792500 |
| H  | -0.02400400 | -4.85780000 | -2.87146800 |
| H  | -0.80429200 | -6.45043800 | -1.13099200 |
| H  | -1.01923000 | -5.12426900 | 0.02451900  |
| C  | 3.11521900  | -1.14915900 | -2.56084000 |
| C  | 2.08022600  | -1.20674300 | -3.70233200 |
| C  | 3.82463400  | 0.21990800  | -2.55843400 |
| H  | 3.86788400  | -1.93157900 | -2.75985900 |
| C  | 2.70680500  | -0.86315400 | -5.06296100 |
| H  | 1.25846800  | -0.49859400 | -3.49098300 |
| H  | 1.62877200  | -2.20728300 | -3.76605200 |
| C  | 4.44762000  | 0.55670700  | -3.92091700 |
| H  | 3.08873700  | 1.00043000  | -2.29193400 |
| H  | 4.60461600  | 0.25173000  | -1.78365800 |
| C  | 3.41440900  | 0.49434600  | -5.04886600 |
| H  | 1.92543800  | -0.88383000 | -5.84230400 |
| H  | 3.43630300  | -1.64947100 | -5.33265700 |
| H  | 4.91289700  | 1.55671800  | -3.87686100 |
| H  | 5.26434400  | -0.15788200 | -4.13434700 |
| H  | 3.89399700  | 0.68892500  | -6.02379300 |
| H  | 2.66563100  | 1.29515100  | -4.90234400 |
| C  | 3.90886100  | -1.98588800 | 0.20217200  |
| C  | 4.99778600  | -2.83664600 | -0.47929100 |
| C  | 4.54237900  | -0.77007800 | 0.90893300  |
| H  | 3.45805800  | -2.59923600 | 1.00106000  |

|   |             |             |             |   |             |             |             |
|---|-------------|-------------|-------------|---|-------------|-------------|-------------|
| C | 6.07132300  | -3.27904800 | 0.52820800  | H | 4.12375400  | 5.66263700  | 1.38900700  |
| H | 5.48218100  | -2.24501200 | -1.27540900 | C | -0.97999100 | 2.86364900  | -1.09471800 |
| H | 4.55927000  | -3.72132100 | -0.96895700 | C | -1.54737400 | 4.28899200  | -1.22954900 |
| C | 5.61063400  | -1.21357300 | 1.91967800  | C | -0.49540400 | 2.34977900  | -2.46567200 |
| H | 5.01108400  | -0.10260200 | 0.16647400  | H | -1.80675900 | 2.20062000  | -0.78150100 |
| H | 3.76297000  | -0.17735700 | 1.41353900  | C | -2.67334700 | 4.34319200  | -2.27463400 |
| C | 6.68863000  | -2.08426900 | 1.26387200  | H | -0.74294400 | 4.97586100  | -1.54351300 |
| H | 6.85555200  | -3.85582100 | 0.00771100  | H | -1.92145800 | 4.65914500  | -0.26190400 |
| H | 5.61590400  | -3.96599600 | 1.26535300  | C | -1.60883900 | 2.41551600  | -3.52131200 |
| H | 6.06879700  | -0.32716300 | 2.39179300  | H | 0.36174300  | 2.95754200  | -2.80857400 |
| H | 5.12492600  | -1.78469900 | 2.73282700  | H | -0.12616900 | 1.31491500  | -2.36763400 |
| H | 7.41333900  | -2.43295700 | 2.01989900  | C | -2.20686500 | 3.82186600  | -3.63819600 |
| H | 7.26066000  | -1.47073400 | 0.54278300  | H | -3.04671900 | 5.37792800  | -2.36635700 |
| C | -0.51491200 | 3.22576100  | 1.81530400  | H | -3.52602900 | 3.73357900  | -1.92165800 |
| C | -1.91157100 | 2.62833000  | 2.07941200  | H | -1.21663700 | 2.08213300  | -4.49763800 |
| C | 0.38566300  | 3.04037000  | 3.05341200  | H | -2.40711600 | 1.70131700  | -3.24655600 |
| H | -0.64394300 | 4.30847200  | 1.64836200  | H | -3.04380200 | 3.82420400  | -4.35782700 |
| C | -2.54949700 | 3.23103400  | 3.34088800  | H | -1.44226700 | 4.50931200  | -4.04606100 |
| H | -1.82430300 | 1.53553000  | 2.20429800  | C | -1.16363900 | -1.06353000 | 1.39360900  |
| H | -2.57863700 | 2.79802100  | 1.22010100  | C | 0.05607100  | -0.79004500 | 1.65724600  |
| C | -0.25240000 | 3.64073000  | 4.31485200  | C | -2.19194600 | -0.88579400 | 0.34312500  |
| H | 0.56124900  | 1.96268400  | 3.21355200  | N | -3.01523300 | -2.11365500 | 0.29651100  |
| H | 1.37456400  | 3.49517700  | 2.88704800  | C | -3.45790600 | -2.53252200 | 1.62567800  |
| C | -1.65090900 | 3.06994100  | 4.57148600  | C | -2.24028800 | -2.82096000 | 2.50611700  |
| H | -3.53248000 | 2.76152800  | 3.51906200  | O | -1.54403700 | -3.83026400 | 2.34459100  |
| H | -2.74402800 | 4.30630200  | 3.17019200  | H | -2.23178900 | -2.27502500 | 3.47237000  |
| H | 0.40266700  | 3.45983500  | 5.18463400  | S | -4.03806900 | -2.34390200 | -1.00504300 |
| H | -0.32159000 | 4.73840500  | 4.19927900  | O | -3.27772400 | -1.94657100 | -2.20362600 |
| H | -2.11026900 | 3.55731900  | 5.44888700  | O | -4.54412900 | -3.72246900 | -0.89809900 |
| H | -1.56477600 | 1.99574200  | 4.81988000  | C | -5.43108800 | -1.23246800 | -0.84559900 |
| C | 1.70908700  | 3.77413700  | -0.12038200 | C | -5.35598300 | 0.05086600  | -1.39692200 |
| C | 1.52528300  | 5.23127500  | 0.35139900  | C | -6.56979400 | -1.64958000 | -0.14312300 |
| C | 3.08177700  | 3.24161600  | 0.34139000  | C | -6.43320100 | 0.92455800  | -1.23217300 |
| H | 1.72267000  | 3.77922600  | -1.22572400 | H | -4.47483400 | 0.36184200  | -1.96072100 |
| C | 2.67130400  | 6.12736900  | -0.14607900 | C | -7.63359600 | -0.76223400 | 0.00984600  |
| H | 1.50886700  | 5.26225000  | 1.45416500  | H | -6.62934300 | -2.65983000 | 0.26574600  |
| H | 0.56346000  | 5.64149600  | 0.01171500  | C | -7.58505400 | 0.53810300  | -0.52715700 |
| C | 4.23091100  | 4.13695400  | -0.14295300 | H | -6.37747900 | 1.92606600  | -1.66711100 |
| H | 3.10324700  | 3.18678800  | 1.44469000  | H | -8.52530400 | -1.08756900 | 0.55314600  |
| H | 3.22289700  | 2.21097500  | -0.02174500 | H | -4.03594800 | -3.46411500 | 1.54086800  |
| C | 4.04114200  | 5.59532500  | 0.28804700  | H | -4.08295100 | -1.75755600 | 2.10814200  |
| H | 2.52410200  | 7.15656900  | 0.22498800  | H | -2.82547200 | -0.00789300 | 0.58384300  |
| H | 2.63451500  | 6.18513600  | -1.24990300 | H | -1.74840400 | -0.72387900 | -0.64988500 |
| H | 5.19249200  | 3.74666300  | 0.23333100  | C | -8.74722300 | 1.47855800  | -0.34940600 |
| H | 4.28471100  | 4.08814500  | -1.24670600 | H | -9.66978300 | 1.04994600  | -0.77595500 |
| H | 4.84720500  | 6.22658100  | -0.12449500 | H | -8.94647100 | 1.66023500  | 0.72032000  |

|                      |             |             |             |   |             |             |             |
|----------------------|-------------|-------------|-------------|---|-------------|-------------|-------------|
| H                    | -8.56334300 | 2.44859000  | -0.83380900 | H | 5.46329200  | 3.06500500  | -0.49412100 |
| C                    | 1.07850700  | -0.97775500 | 2.73782600  | H | 4.62122200  | 4.60581300  | -0.27796900 |
| H                    | 1.85785300  | -1.66715300 | 2.37253400  | H | 3.27496500  | 4.65091900  | -3.87432800 |
| H                    | 1.59645900  | -0.01987800 | 2.91411300  | H | 3.26065200  | 5.58468800  | -2.37231900 |
| C                    | 0.53507400  | -1.50631900 | 4.07709800  | H | 5.45722900  | 4.46490600  | -2.60838200 |
| C                    | 1.62376300  | -1.60210500 | 5.15053000  | H | 4.67384500  | 2.89402000  | -2.83124300 |
| H                    | 0.08711100  | -2.50100800 | 3.92104500  | C | -1.04373800 | 3.34817100  | -0.98821600 |
| H                    | -0.27569400 | -0.84561700 | 4.43124900  | C | -1.21621200 | 4.87147900  | -1.16328800 |
| C                    | 1.11164900  | -2.14716500 | 6.48362600  | C | -1.29107600 | 2.60628600  | -2.31820700 |
| H                    | 2.44334100  | -2.24568500 | 4.78120900  | H | -1.84070600 | 3.01716300  | -0.29992500 |
| H                    | 2.07146200  | -0.60365700 | 5.30807200  | C | -2.59286600 | 5.20880900  | -1.75889500 |
| H                    | 1.91824400  | -2.20482800 | 7.23342200  | H | -0.43273100 | 5.26821100  | -1.83024200 |
| H                    | 0.31562000  | -1.50680400 | 6.90131400  | H | -1.10207400 | 5.39377700  | -0.20091900 |
| H                    | 0.69192900  | -3.16133200 | 6.36865100  | C | -2.66728700 | 2.95673700  | -2.90399000 |
| <b>TS-L4-endo-1g</b> |             |             |             | H | -0.51113600 | 2.87062400  | -3.05107200 |
| P                    | 0.49370500  | 2.74747600  | -0.06500900 | H | -1.21311800 | 1.51780000  | -2.15855900 |
| P                    | 1.63756300  | -1.75959500 | -1.23587300 | C | -2.84422900 | 4.46921300  | -3.07714600 |
| Pd                   | 0.81813000  | 0.32654200  | -0.28795300 | H | -2.67401300 | 6.29954500  | -1.90765600 |
| C                    | 0.25442200  | 3.63656200  | 1.59227400  | H | -3.37888100 | 4.93232100  | -1.03208000 |
| C                    | -0.91895200 | 3.04161600  | 2.39649900  | H | -2.80365700 | 2.43984800  | -3.86972100 |
| C                    | 1.51479400  | 3.72767900  | 2.47344500  | H | -3.45479900 | 2.57638900  | -2.22803800 |
| H                    | -0.01289000 | 4.66983200  | 1.31006300  | H | -3.85556300 | 4.69617000  | -3.45661800 |
| C                    | -1.18835700 | 3.83213800  | 3.68514500  | H | -2.13360900 | 4.83487300  | -3.84193800 |
| H                    | -0.68035400 | 1.99752800  | 2.65843600  | C | 0.51649000  | -3.24150400 | -1.53121500 |
| H                    | -1.83907000 | 3.00632600  | 1.79397800  | C | 0.10046100  | -3.96302900 | -0.23434000 |
| C                    | 1.24165600  | 4.50639300  | 3.77087900  | C | -0.72825700 | -2.85380700 | -2.35511000 |
| H                    | 1.86879300  | 2.71251500  | 2.72367600  | H | 1.11174300  | -3.95167900 | -2.12949600 |
| H                    | 2.33256100  | 4.22462200  | 1.93140300  | C | -0.78958900 | -5.17972100 | -0.53087900 |
| C                    | 0.06387200  | 3.92892500  | 4.56118800  | H | -0.44533800 | -3.26116900 | 0.41838800  |
| H                    | -2.01420200 | 3.35676500  | 4.24207900  | H | 0.98716600  | -4.29055000 | 0.32966400  |
| H                    | -1.53236500 | 4.85044100  | 3.42443500  | C | -1.61882400 | -4.07049900 | -2.64624100 |
| H                    | 2.15459000  | 4.51721900  | 4.39120800  | H | -1.31072800 | -2.10178800 | -1.79514200 |
| H                    | 1.02546700  | 5.56100600  | 3.51733600  | H | -0.43470900 | -2.37560100 | -3.30221900 |
| H                    | -0.13641900 | 4.54447200  | 5.45525700  | C | -2.02052800 | -4.80306600 | -1.36189500 |
| H                    | 0.32928000  | 2.92040500  | 4.92866900  | H | -1.09649100 | -5.65265600 | 0.41787800  |
| C                    | 2.01527900  | 3.62415300  | -0.78021400 | H | -0.19785400 | -5.93601800 | -1.07954600 |
| C                    | 3.30434700  | 2.88693100  | -0.35189700 | H | -2.51604700 | -3.74846400 | -3.20259900 |
| C                    | 2.02866800  | 3.80469600  | -2.31138000 | H | -1.07399400 | -4.76805600 | -3.30920200 |
| H                    | 2.01456100  | 4.63086600  | -0.32437500 | H | -2.61149700 | -5.70372700 | -1.60231800 |
| C                    | 4.56811000  | 3.63293400  | -0.80127400 | H | -2.67891600 | -4.14871200 | -0.76090100 |
| H                    | 3.29323200  | 1.87942000  | -0.80682700 | C | 2.40775700  | -1.38378800 | -2.92915700 |
| H                    | 3.33205800  | 2.72781800  | 0.73557100  | C | 2.56745600  | -2.56615200 | -3.90713700 |
| C                    | 3.28792200  | 4.55498100  | -2.77479200 | C | 1.71144600  | -0.20518800 | -3.63952800 |
| H                    | 1.99642100  | 2.81502800  | -2.79880600 | H | 3.42054200  | -1.03801400 | -2.65332300 |
| H                    | 1.14114200  | 4.35336800  | -2.65306500 | C | 3.33419600  | -2.14239200 | -5.17033100 |
| C                    | 4.57695200  | 3.86719100  | -2.31495100 | H | 1.57157500  | -2.93305500 | -4.20795100 |

|   |             |             |             |                     |             |             |             |
|---|-------------|-------------|-------------|---------------------|-------------|-------------|-------------|
| H | 3.08254600  | -3.41173600 | -3.42972000 | C                   | -6.91071800 | -2.16537600 | -1.47387400 |
| C | 2.46417200  | 0.21761300  | -4.90878700 | H                   | -7.90062600 | -2.82171300 | 0.33489200  |
| H | 0.67871800  | -0.49164300 | -3.90672200 | H                   | -5.73946200 | -1.27868100 | -3.06690700 |
| H | 1.62462400  | 0.64843000  | -2.94757200 | H                   | -2.93316400 | -2.37860500 | 1.75994900  |
| C | 2.66422400  | -0.95688800 | -5.87296300 | H                   | -3.95704300 | -1.52881500 | 2.94551000  |
| H | 3.41463500  | -3.00118000 | -5.85911700 | H                   | -2.00572800 | 0.78239500  | 0.07237900  |
| H | 4.36853300  | -1.86665300 | -4.89267400 | H                   | -2.13538400 | -0.96173900 | -0.21054400 |
| H | 1.92118300  | 1.03815600  | -5.40899100 | C                   | -7.71019900 | -3.04501100 | -2.39774900 |
| H | 3.45181600  | 0.62507000  | -4.62288000 | H                   | -7.04933800 | -3.70814700 | -2.98093800 |
| H | 3.26059600  | -0.63999500 | -6.74597300 | H                   | -8.42534000 | -3.67145800 | -1.84512100 |
| H | 1.68084200  | -1.27675600 | -6.26536300 | H                   | -8.27547300 | -2.43927300 | -3.12627400 |
| C | 3.05792800  | -2.43856600 | -0.19891600 | C                   | 0.94349600  | -1.26257100 | 3.09121700  |
| C | 3.79231200  | -3.67833500 | -0.74337300 | C                   | 1.27575000  | -2.60615200 | 3.38023100  |
| C | 4.06735800  | -1.33073600 | 0.16660400  | C                   | 1.70481300  | -0.25812000 | 3.73634400  |
| H | 2.54871000  | -2.72877100 | 0.73683800  | C                   | 2.32425100  | -2.92080100 | 4.24907300  |
| C | 4.84504000  | -4.18626900 | 0.25451000  | H                   | 0.69803400  | -3.40929400 | 2.91983400  |
| H | 4.30183400  | -3.41946800 | -1.68699100 | C                   | 2.74580600  | -0.58329600 | 4.60478700  |
| H | 3.08082000  | -4.48615200 | -0.97695600 | H                   | 1.46399100  | 0.79033100  | 3.55260900  |
| C | 5.13825700  | -1.83782100 | 1.14430400  | C                   | 3.08090400  | -1.92185600 | 4.88261800  |
| H | 4.56377600  | -0.96290500 | -0.74980200 | H                   | 2.55522300  | -3.97265500 | 4.44483300  |
| H | 3.53570600  | -0.46974300 | 0.60467000  | H                   | 3.31230200  | 0.22264600  | 5.08274000  |
| C | 5.85056600  | -3.08944800 | 0.62040200  | C                   | 4.21036900  | -2.25781900 | 5.82414200  |
| H | 5.36735700  | -5.06105300 | -0.17024500 | H                   | 5.17712000  | -1.88510400 | 5.44264800  |
| H | 4.33776100  | -4.53868100 | 1.17152000  | H                   | 4.06165900  | -1.79364000 | 6.81425600  |
| H | 5.86852800  | -1.03431900 | 1.34293100  | H                   | 4.30495000  | -3.34441300 | 5.97146000  |
| H | 4.65875200  | -2.07096500 | 2.11183400  |                     |             |             |             |
| H | 6.57052700  | -3.46191900 | 1.36955500  | <b>TS-L4-exo-1g</b> |             |             |             |
| H | 6.44139700  | -2.82544900 | -0.27679200 | P                   | 0.34702100  | 2.70833300  | -0.15467800 |
| C | -0.56231000 | -0.41001800 | 1.13832800  | P                   | 2.14184300  | -1.64333800 | -0.86948100 |
| C | -0.19067800 | -0.93771800 | 2.25864500  | Pd                  | 0.93310200  | 0.34060900  | -0.13262600 |
| C | -1.93835300 | -0.19389000 | 0.56160500  | C                   | 1.91010800  | 3.76583600  | -0.33285100 |
| N | -2.96882900 | -0.25066700 | 1.61282300  | C                   | 2.66036400  | 3.94361700  | 1.00492600  |
| C | -3.00211600 | -1.47907500 | 2.39814100  | C                   | 2.88785300  | 3.19103800  | -1.37998300 |
| C | -1.91545200 | -1.53520600 | 3.46423100  | H                   | 1.57671800  | 4.76132000  | -0.67477300 |
| O | -1.66178000 | -2.62512800 | 4.01372100  | C                   | 3.90244800  | 4.83416000  | 0.84526400  |
| H | -1.79746700 | -0.57428900 | 4.01808600  | H                   | 2.97339800  | 2.95161400  | 1.37563500  |
| S | -4.43089800 | 0.51592300  | 1.31974200  | H                   | 2.00783700  | 4.37496900  | 1.77751800  |
| O | -5.13187300 | 0.59302100  | 2.61083500  | C                   | 4.12854000  | 4.07961400  | -1.55327700 |
| O | -4.11580900 | 1.76341600  | 0.59879200  | H                   | 3.20256800  | 2.18527600  | -1.04873500 |
| C | -5.41096800 | -0.51159300 | 0.22827800  | H                   | 2.39618800  | 3.05522800  | -2.35232400 |
| C | -6.39089100 | -1.34992800 | 0.76816500  | C                   | 4.85895100  | 4.30172900  | -0.22573600 |
| C | -5.17265600 | -0.47933600 | -1.15315700 | H                   | 4.42110500  | 4.92019200  | 1.81584100  |
| C | -7.13138000 | -2.16955000 | -0.08725800 | H                   | 3.58068800  | 5.85644300  | 0.57237800  |
| H | -6.58464000 | -1.35417300 | 1.84200700  | H                   | 4.80798100  | 3.62503300  | -2.29501000 |
| C | -5.92141200 | -1.30579400 | -1.98884000 | H                   | 3.82089500  | 5.05662700  | -1.97057400 |
| H | -4.42074100 | 0.18930000  | -1.57580900 | H                   | 5.70782300  | 4.99394100  | -0.36230400 |
|   |             |             |             | H                   | 5.28902600  | 3.34203400  | 0.11646700  |

|   |             |             |             |   |             |             |             |
|---|-------------|-------------|-------------|---|-------------|-------------|-------------|
| C | -0.78610300 | 3.19428500  | -1.60719100 | H | 1.00102700  | -6.04194900 | -0.28648800 |
| C | -0.09855700 | 3.68101100  | -2.89681500 | H | -1.63894000 | -4.44619100 | -2.57159300 |
| C | -1.76842200 | 2.05228000  | -1.93991200 | H | -0.06389600 | -5.25523000 | -2.62035400 |
| H | -1.37658000 | 4.04294800  | -1.22261300 | H | -1.41518700 | -6.23757300 | -0.79805000 |
| C | -1.13212500 | 4.11782300  | -3.94708900 | H | -1.72795900 | -4.64040100 | -0.10757300 |
| H | 0.51538900  | 2.86785000  | -3.32137100 | C | 2.86358000  | -1.29652400 | -2.58978300 |
| H | 0.58045100  | 4.52143100  | -2.68724600 | C | 3.23931200  | -2.51497500 | -3.45761100 |
| C | -2.79967900 | 2.47481100  | -2.99631900 | C | 1.98284500  | -0.32457200 | -3.40218900 |
| H | -1.19351900 | 1.18507900  | -2.31200100 | H | 3.79711400  | -0.75671400 | -2.34733400 |
| H | -2.28673100 | 1.70984500  | -1.03192200 | C | 3.93567700  | -2.07964600 | -4.75731800 |
| C | -2.12890900 | 3.00012600  | -4.26947800 | H | 2.32623000  | -3.07628000 | -3.71913600 |
| H | -0.61094900 | 4.44429000  | -4.86373400 | H | 3.88893100  | -3.21066100 | -2.90726400 |
| H | -1.68175000 | 5.00008900  | -3.56950600 | C | 2.66681800  | 0.10747900  | -4.70687900 |
| H | -3.45932600 | 1.62219100  | -3.23369100 | H | 1.01938100  | -0.81026000 | -3.63898000 |
| H | -3.44954400 | 3.26379700  | -2.57384800 | H | 1.74044100  | 0.55950100  | -2.78931800 |
| H | -2.88851600 | 3.35702700  | -4.98637200 | C | 3.07911600  | -1.09607900 | -5.56159300 |
| H | -1.59432600 | 2.16980500  | -4.76740200 | H | 4.17230000  | -2.96936500 | -5.36639400 |
| C | -0.53043000 | 3.52576500  | 1.31115400  | H | 4.90319700  | -1.60449400 | -4.50974600 |
| C | -0.68071300 | 5.05942100  | 1.23448200  | H | 1.99620400  | 0.77276700  | -5.27802400 |
| C | -1.89316000 | 2.87705700  | 1.62565700  | H | 3.56507700  | 0.70471500  | -4.46208300 |
| H | 0.13742500  | 3.29506900  | 2.15909500  | H | 3.62207200  | -0.76026300 | -6.46205700 |
| C | -1.29159300 | 5.62829800  | 2.52567200  | H | 2.17070000  | -1.61557000 | -5.91968800 |
| H | -1.33513200 | 5.32617900  | 0.38600500  | C | 3.64157800  | -1.98789600 | 0.22241000  |
| H | 0.28770200  | 5.54678000  | 1.04565800  | C | 4.56338800  | -3.15171200 | -0.18840900 |
| C | -2.50191400 | 3.44392000  | 2.91723400  | C | 4.47049900  | -0.71086700 | 0.46728500  |
| H | -2.59296800 | 3.06445600  | 0.79238100  | H | 3.17139500  | -2.25276600 | 1.18647100  |
| H | -1.78383000 | 1.78607100  | 1.71296500  | C | 5.66077800  | -3.39153900 | 0.86064700  |
| C | -2.63258800 | 4.96945300  | 2.86426600  | H | 5.04574900  | -2.91536600 | -1.15213700 |
| H | -1.41398800 | 6.72091400  | 2.42693500  | H | 3.98664700  | -4.07749800 | -0.34075300 |
| H | -0.58491000 | 5.46812100  | 3.36106600  | C | 5.58245900  | -0.94572500 | 1.50074500  |
| H | -3.48697600 | 2.97981500  | 3.09815000  | H | 4.92829600  | -0.37794400 | -0.48193600 |
| H | -1.86154000 | 3.16082200  | 3.77320200  | H | 3.81044000  | 0.10578900  | 0.80212500  |
| H | -3.01949100 | 5.35648600  | 3.82285000  | C | 6.48370700  | -2.12459200 | 1.11754300  |
| H | -3.37673900 | 5.24360600  | 2.09311800  | H | 6.31699000  | -4.21567000 | 0.53086000  |
| C | 1.29421500  | -3.32099300 | -1.02528400 | H | 5.19352600  | -3.72290900 | 1.80653400  |
| C | 0.99127600  | -3.96549800 | 0.34114000  | H | 6.18152500  | -0.02593700 | 1.61754300  |
| C | 0.00578200  | -3.22284200 | -1.86649600 | H | 5.12179200  | -1.14557700 | 2.48532300  |
| H | 2.00338100  | -3.97629400 | -1.55904600 | H | 7.23356700  | -2.30601200 | 1.90697000  |
| C | 0.30013100  | -5.32901800 | 0.18725500  | H | 7.04936200  | -1.86834500 | 0.20210400  |
| H | 0.33451100  | -3.29825800 | 0.92100800  | C | -1.20971600 | -0.86790600 | 1.49293600  |
| H | 1.91461000  | -4.09181400 | 0.92728400  | C | -0.00687300 | -0.45736100 | 1.66678100  |
| C | -0.69689200 | -4.58117700 | -2.01326500 | C | -2.29830700 | -0.91597200 | 0.49356500  |
| H | -0.68606500 | -2.51416800 | -1.38268300 | N | -3.16681600 | -2.07342000 | 0.80296400  |
| H | 0.22449800  | -2.81104900 | -2.86431100 | C | -3.45170000 | -2.19802600 | 2.23094500  |
| C | -0.97568700 | -5.23481400 | -0.65534100 | C | -2.14085100 | -2.45195000 | 2.97247000  |
| H | 0.06757200  | -5.73506300 | 1.18676200  | O | -1.51765300 | -3.50705100 | 2.81798800  |

|   |             |             |             |   |             |             |             |
|---|-------------|-------------|-------------|---|-------------|-------------|-------------|
| H | -1.95766000 | -1.80084500 | 3.85451000  | H | -9.03611200 | 1.83556800  | 0.96989300  |
| S | -4.31599100 | -2.55013700 | -0.30778300 | H | -8.82118000 | 2.24334500  | -0.75422100 |
| O | -3.68403000 | -2.43209400 | -1.63387000 | H | -9.90661300 | 0.91431200  | -0.26624200 |
| O | -4.81150500 | -3.86139900 | 0.14244000  | C | 0.97164800  | -0.45918800 | 2.77003800  |
| C | -5.68725100 | -1.40157400 | -0.25387100 | C | 1.69116700  | 0.69297400  | 3.14271600  |
| C | -5.69113900 | -0.29237500 | -1.10562600 | C | 1.18514800  | -1.63193500 | 3.52752200  |
| C | -6.72944000 | -1.61268200 | 0.65929500  | C | 2.57336700  | 0.67716600  | 4.22512600  |
| C | -6.74953700 | 0.61637200  | -1.03257300 | H | 1.54745100  | 1.61697300  | 2.58343700  |
| H | -4.88690200 | -0.14722000 | -1.82899200 | C | 2.07061200  | -1.63877200 | 4.60724800  |
| C | -7.77519100 | -0.69344400 | 0.71708700  | H | 0.63314600  | -2.53978900 | 3.28056800  |
| H | -6.73117900 | -2.49203400 | 1.30589000  | C | 2.78698700  | -0.48844900 | 4.97963800  |
| C | -7.80444100 | 0.43586300  | -0.12302700 | H | 3.10527200  | 1.59567800  | 4.49147300  |
| H | -6.75638800 | 1.48058600  | -1.70217600 | H | 2.20583800  | -2.56382100 | 5.17658600  |
| H | -8.59178300 | -0.85885500 | 1.42564400  | C | 3.76427800  | -0.51332400 | 6.12726400  |
| H | -4.10144400 | -3.06986600 | 2.39738700  | H | 3.43157900  | -1.19266800 | 6.92800700  |
| H | -3.94497000 | -1.29295000 | 2.63136300  | H | 4.75667400  | -0.86841000 | 5.79525700  |
| H | -2.88124200 | 0.02637100  | 0.54402200  | H | 3.90635700  | 0.48903300  | 6.56018300  |
| H | -1.92364700 | -1.02373100 | -0.53447300 |   |             |             |             |
| C | -8.94751500 | 1.41255500  | -0.04498000 |   |             |             |             |
